# Supplementary material for: Phylogenetic position of the enigmatic genus Atherospio and description of Atherospio aestuarii sp. nov. (Annelida: Spionidae) from Japan
Source: PeerJ. 2022 Aug 25;10:e13909. doi: 10.7717/peerj.13909 (PMC9420407; doi:10.7717/peerj.13909)
Supplement: Supplemental Information 2 [file peerj-10-13909-s002.xlsx]

## Sheet: Sheet1
		Supplementary file S2. Raw data for morphological measurements.
		Species	Museum registration number	No. of specimen	Condition	Number of chaetiger	Body length (mm)	Body width at chaetiger 5 (mm)	Branchiae			Neuropodial hooded hook
									Start1	End2		Start1
		Atherospio aestuarii sp. nov.	NSMT-Pol P-859	1	Incomplete	24	5	0.8	7	23		19
			NSMT-Pol P-860	1	Incomplete	40	10.1	1.2	7	23		18
			NSMT-Pol P-861	1	Incomplete	40	14.4	1.5	7	19		18
			NSMT-Pol P-862	1	Incomplete	21	3.2	1	7	18		17
			NSMT-Pol P-863	7	Incomplete	11–48	2.4–8.6	1.0–1.1	7	18–19		17–19
			NSMT-Pol P-864	1	Incomplete	23	3.4	0.9	7	19		18
			NSMT-Pol H-858	1	Complete	64	9.5	1.2	7	19		19
			NSMT-Pol P-865	1	Incomplete	38	8.4	1.3	7	20		19
			NSMT-Pol P-866	2	Incomplete	18–19	2.3–3.2	1.0–1.2	7	18		16–17
		1Numbers refer to the chaetigers
