# Supplementary material for: Phylogenetic position of the enigmatic genus Atherospio and description of Atherospio aestuarii sp. nov. (Annelida: Spionidae) from Japan
Source: PeerJ journal article supplement (doi:10.7717/peerj.13909), 2022-08-25
Supplement: Supplementary_file_S1_20220224.pdf [file Supplementary_file_S1_20220224.pdf]

Supplementary file S1

Multiple sequence alignment of concatenated 16S, 18S, and 28S rRNA gene sequences used for molecular phylogenetic analysis.

Data partitions

16S: 1-434

18S: 435-2137

28S: 2138-2800

>Atherospio\_aestuarii\_P861

```
CGCCTTTAGATTAAAGGTATATTCTGCCCTATGTAAATGGCCGCGGTACCCTGACCGTGCTAAGGT
AGCATAATAATTTGCCTCCTAATTAGAGGCTGGAATGAAGGAACACGAAAGTTAACTGTTTCA
TTTTTACTAAAACTATCATTCAAGTGAAGAGACTTGTATTTATAAAAAGACAAAAGACCCAT
TGAGCTTTATTCTACTTATTACCCTGATAAAGAATTTTGTGGGGCGACAAGAGAAGACTAAATCT
TCTCAACCTCCTAAAAAGATCCGAAACGATCAAAAATCTAGCTACCCTAGGGATAACAGGCTAATC
TTCTTTGAGAGCCCAAATTGACAAGAAGGATTGGCACCTCGATGTTGGCTTAGGGTACCAAATAAA
TGCAGAAGTAAGTAGGTTTGTTC AACCTTTAATACCCTATATGCTTGTCTCAAAGACTAAGCCATG
CATGTCTAAGTACAAGCTCAACATGGTGAACCGCGAATGGCTCATTAAATCAGTTATGGTTCCCTT
AGATCGTACTATCCTACTTGGATAACTGTAGTAATTCTAGAGCTAATACATGCAATCAAGCTCCGA
CCTCGCGGGAGGAGCGCTTTTATTAGACCAAAACCAATGGGGGCGACTAACTTCTGGTGACTCTGG
ATAACTTTGAGCTGATCGCACGGCCGCGCCGGCGACGTATCTTTCAAATGTCTGCCCTATCAAGTT
TCGACGGTTGGTGACTTGCCAACCGTGCTGATAACGGGTAGCGGGGAATCAGGGTTTCGATTCCGGA
GAGGGAGCATGAGAAACGGCTACCACATCCAAGGAAGGCAGCAGGCGCGCAAATTACCCACTCCTA
GCTCGGGGAGGTAGTGACGAAAATAACAATACGGGACTCTTACGAGGCCCCGTAATTGGAATGAG
TACACTTTAAATCCTTTAACGAGGATCTATTGGAGGGCAAGTCTGGTGCCAGCAGCCGCGGTAATT
CCAGCTCCAATAGCGTATATTTAAAGTTGTTGCAGTTAAAAAGCTCGTAGTTGGATCTCGGGTGCAG
GCTGGCGGTCCGCCTCGCGGCGGTTTACTGCCTCCTGCTCCTCTTGCCGGTTTCCCTTGGTGCTCT
TCGCTGGGGTGGCCGGGACGTTTACTTTGAAAAAATTAGAGTGTTCAAAGCAGGCCCTGAATACTG
GTGCATGGAATAATGGAATAGGACCTCGGATTTTGTGGTTTTTCGGAAGTCGAGGTAATGATTAAT
AGGGACGGCGGGGGCATTGTATTGCGTCTTAGAGGTGAAATTTCTGGATCGACGCAAGACAGAC
TACAGCGAAGGCGTTTGCCAAGCACGTCTTCTTTAATCAAGAGCGACAGTCAGAGGTTCGAAGACG
ATCAGATACCGTCTAGTTCTGACCATAAACGATGCCAGCTAGGGATTCCGCCGGAGTTGTCTGACT
CGGCGAGCACCTTCCGGGAAACCAAAGCTTTTGGGTTCCGGGGGAAGTATGGTTGCAAAGCTGAAA
CTTAAAGGAATTGACGGAAGGGCACCACCAGGAGTGGAGCCTGCGGCTTAATTTGACTCAACACGG
GGAAACTCACCCGGCCCGGACACCGTAAGGATTGACAGATTGAGAGCTCTTTCTTGATTCGGTGGG
TGGTGGTGCATGGCCGTTCTTAGTTGGTGGAGCGATTTGTCTGGTTAATTCCGATAACGAACGAGA
```

CTCTAGCCTATTAATAGTTCGCCGATTTCGTCCGGCAAACCTTCTTAGAGGGACAAGTGGCGTTCAG  
CCACGCGAGATTGAGCAATAACAGGTCTGTGATGCCCTTAGATGTTTCGGGGCCGCACGCGCGCTAC  
ACTGAAGGACTCAGCGTGTCTTCTCCTGGCCAGAAATGGTCCGGCAACCCGTTGAACCTCCTTCGT  
GCTAGGGATTGGGGCTTGCAATTCTTCCCCATGAACGAGGAATCCCAGTAAGCGCGAGTCATCAG  
CTCGCGTTGATTACGTCCCTGCCCTTGTACACACCGCCCGTTCGCTACTACCGATTGGATGGTTTA  
GTGAGACCCTCGGATTGGTCCCGACGGTGGGCGACCGCCGTCGTGGTGGCGAGAAGACGGTCAAAC  
TTGACTATCTAGAGGAAGTAAAAGTTCACTAAGCGGAGGAAAAGAACTAACCCAGGATTCCCCTAG  
TAACGGCGAGTGAAGCGGAAGAGCCCAGCACTGAATCCCCTGCATCGACTGTAGAGGAACTGTA  
GTGTTCCGGGAGAGCCTCTGGGGCGACGGCGGCGTCCGAGTCTCCTGATCGGGGTTACCCAGAGCG  
GGTGTCCAGGCCTCTACGGCGGCTTCCGTCGTCCCTCTGTGCCTCCTAGGAGTCCGGGTTGTTTGA  
ATGCAGCCCAAAGCGGGTGGTAAACTCCATCTAAGGCTAAATACTGGCACGAGACCGATAGCGGAC  
AAGTACCGTGAGGGAAAGTTGAAAAGAAGTTTGAAGAGAGAGTTCAAGAGTACGTGAAACCGTATA  
GAGGCAAACGGATGGGACCGCAGTCGATCCGCGGGATTAGCTTCTGCCGGGCGGGCTGCGGACCT  
TCACGGGGAGTGCACCTTCCGCGGGGAGAGCGCCACGACCGCTTCTCGGGCCGTCAAGCTCCGGCG  
GAAGGTAGCTCGAGTGTATAGCCGCCGGTAGTGTCCGGCCGGGGGAGCGAGGAATGCCCGCCGGA  
GACCGGTCGACTGGCGAGGACTGCTCGCAGTGTCCGCGACTGCGCCGTTCCGGGCCACCCAGGGTC  
TGTGGCGAAGTCGGTTTCCCATCCGACC

>Atherospio\_aestuarii\_P862

CGCCTTTAGATTAAAGGTATATTCTGCCCTATGTAAATGGCCGCGGTACCCTGACCGTGCTAAGGT  
AGCATAATAATTTGCCTCCTAATTAGAGGCTGGAATGAAGGAACTCACGAAAGTTAACTGTTTCA  
TTTTTACTAAAACTATCATTCAAGTGAAGAGACTTGTATTTTATAAAAAGACAAAAGACCCAT  
TGAGCTTTATTCTACTTATTACCCTGATAAAGAATTTTGTGGGGCGACAAGAGAAGACTAAATCT  
TCTCAACCTCCTAAAAAGATCCGAGACGATCAAAAATCTAGCTACCCTAGGGATAACAGGCTAATC  
TTCTTTGAGAGCCCAAATTGACAAGAAGGATTGGCACCTCGATGTTGGCTTAGGGCACCAAATAAA  
TGCAGAAGTAAGTGGGTTTGTTCACCTTTAATACCCTATATGCTTGTCTCAAAGACTAAGCCATG  
CATGTCTAAGTACAAGCTCAACATGGTGAACCCGGAATGGCTCATTAAATCAGTTATGGTTCCTT  
AGATCGTACTATCCTACTTGGATAACTGTAGTAATTCTAGAGCTAATACATGCAATCAAGCTCCGA  
CCTCGCGGGAGGAGCGCTTTTATTAGACCAAACCAATGGGGGCGACTAACTTCTGGTGACTCTGG  
ATAACTTTGAGCTGATCGCACGGCCGCGCCGGCGACGTATCTTTCAAATGTCTGCCCTATCAAGTT  
TCGACGGTTGGTGACTTGCCAACCGTGCTGATAACGGGTAGCGGGGAATCAGGGTTCGATTCCGGA  
GAGGGAGCATGAGAAACGGCTACCACATCCAAGGAAGGCAGCAGGCGCGAAATTACCCACTCCTA  
GCTCGGGGAGGTAGTGACGAAAATAACAATACGGGACTCTTACGAGGCCCCGTAATTGGAATGAG  
TACACTTTAAATCCTTTAACGAGGATCTATTGGAGGGCAAGTCTGGTGCCAGCAGCCGCGGTAATT  
CCAGCTCCAATAGCGTATATTAAGTTGTTGCAGTTAAAAGCTCGTAGTTGGATCTCGGGTGCAG  
GCTGGCGGTCCGCCTCGCGGCGGTTTACTGCCTCCTGCTCCTTTCGGGTTTCCCTTGGTGCTCT

TCGCTGGGGTGGCCGGGACGTTTACTTTGAAAAAATTAGAGTGTTCAAAGCAGGCCCTGAATACTG  
GTGCATGGAATAATGGAATAGGACCTCGGATTTTGTGGTTTTTCGGAAGTCGAGGTAATGATTAAT  
AGGGACGGCGGGGGCATTGTATTGCGTCGTTAGAGGTGAAATTCTTGGATCGACGCAAGACAGAC  
TACAGCGAAGGCGTTTGCCAAGCACGTCTTCTTTAATCAAGAGCGACAGTCAGAGGTTTGAAGACG  
ATCAGATACCGTCGTAGTTCTGACCATAAACGATGCCAGCTAGGGATTTCGCCGGAGTTGTCTGACT  
CGGCGAGCACCTTCCGGGAAACCAAAGCTTTTGGGTTCCGGGGGAAGTATGGTTGCAAAGCTGAAA  
CTTAAAGGAATTGACGGAAGGGCACCACCAGGAGTGGAGCCTGCGGCTTAATTTGACTCAACACGG  
GGAAACTCACCCGGCCCGGACACCGTAAGGATTGACAGATTGAGAGCTCTTTCTTGATTGCGGTGGG  
TGGTGGTGCATGGCCGTTCTTAGTTGGTGGAGCGATTTGTCTGGTTAATTCGATAACGAACGAGA  
CTCTAGCCTATTAATAGTTCGCCGATTTCGTCCGGCAAACCTTCTTAGAGGGACAAGTGGCGTTCAG  
CCACGCGAGATTGAGCAATAACAGGTCTGTGATGCCCTTAGATGTTCCGGGGCCGCACGCGCGCTAC  
ACTGAAGGACTCAGCGTGTCTTCTCCTGGCCAGAAATGGTCCGGCAAACCCGTTGAACCTCCTTCGT  
GCTAGGGATTGGGGCTTGCAATTCTTCCCATGAACGAGGAATTCAGTAAGCGCGAGTCATCAG  
CTCGCGTTGATTACGTCCCTGCCCTTTGTACACACCGCCCGTCCGCTACTACCGATTGGATGGTTTA  
GTGAGACCCTCGGATTGGTCCCGACGGTGGGCGACCGCCGTCGTGGTGGCGAGAAGACGGTCAAAC  
TTGACTATCTAGAGGAAGTAAAAGTTCACTAAGCGGAGGAAAAGAACTAACCCAGGATTCCCCTAG  
TAACGGCGAGTGAAGCGGAAGAGCCCAGCACTGAATCCCCTGCATCGACTGTAGAGGGAAGTGT  
GTGTTCCGGGAGAGCCTCTGGGGCGACGGCGGCGTCCGAGTCCCTCCTGATCGGGGTTACCCAGAGCG  
GGTGTGAGGCTCTACGGCGGCTTCCGTGTCCTCTGTGCCTCCTAGGAGTCGGGTTGTTTGAGA  
ATGCAGCCCAAAGCGGGTGGTAAACTCCATCTAAGGCTAAATACTGGCACGAGACCGATAGCGGAC  
AAGTACCGTGAGGGAAAGTTGAAAAGAACTTTGAAGAGAGAGTTCAAGAGTACGTGAAACCGTATA  
GAGGCAAACGGATGGGACCGCAGTCGATCCGCGGGATTGAGCTTCTGCCGGGCGGGCTGCGGACCT  
TCACGGGGAGTGACTTTCCGCGGGGAGAGCGCCACGACCGCTTCTCGGGCCGTCAAGCTCCGGCG  
GAAGGTAGCTCGAGTGTATAGCCCGCGGTAGTGTGCGCCGGGGGAGCGAGGAATGCCCGCCGGA  
GACCGGTCGACTGGCGAGGACTGCTCGCAGTGTGCGCCGACTGCGCCGTTCCGGGCCACCCAGGGTC  
TGTGGCGAAGTCGGTTTCCCATCCGACC

>Atherospio\_aestuarii\_P863

CGCCTTTAGATTAAAGGTATATTCTGCCCTATGTAAATGGCCGCGGTACCCTGACCGTGCTAAGGT  
AGCATAATAATTTGCCTCCTAATTAGAGGCTGGAATGAAGGAACTCACGAAAGTTAACTGTTTCA  
TTTTTACTAAAACTATCATTCAAGTGAAGAGACTTGTATTTATAAAAAGACAAAAGACCCCTAT  
TGAGCTTTATTCTACTTATTACCCTGATAAAGAATTTTGTGGGGCGACAAGAGAAGACTAAATCT  
TCTCAACCTCCTAAAAAGATCCGAAACGATCAAAAATCTAGCTACCCTAGGGATAACAGGCTAATC  
TTCTTTGAGAGCCCAAATTGACAAGAAGGATTGGCACCTCGATGTTGGCTTAGGGTACCAAATAAA  
TGCAGAAGTAAGTAGGTTTGTTC AACCTTTAATACCCTATATGCTTGTCTCAAAGACTAAGCCATG  
CATGTCTAAGTACAAGCTCAACATGGTGAACCCGCAATGGCTCATTAAATCAGTTATGGTTCCCTT

AGATCGTACTATCCTACTTGGATAACTGTAGTAATTCTAGAGCTAATACATGCAATCAAGCTCCGA  
CCTCGCGGGAGGAGCGCTTTTATTAGACCAAAACCAATGGGGGCGACTAACTTCTGGTGACTCTGG  
ATAACTTTGAGCTGATCGCACGGCCGCGCCGGCGACGTATCTTTCAAATGTCTGCCCTATCAAGTT  
TCGACGGTTGGTGACTTGCCAACCGTGCTGATAACGGGTAGCGGGGAATCAGGGTTTCGATTCCGGA  
GAGGGAGCATGAGAAACGGCTACCACATCCAAGGAAGGCAGCAGGCGCGCAAATTACCCACTCCTA  
GCTCGGGGAGGTAGTGACGAAAAATAACAATACGGGACTCTTACGAGGCCCCGTAATTGGAATGAG  
TACACTTTAAATCCTTTAACGAGGATCTATTGGAGGGCAAGTCTGGTGCCAGCAGCCGCGGTAATT  
CCAGCTCCAATAGCGTATATTTAAAGTTGTTGCAGTTAAAAAGCTCGTAGTTGGATCTCGGGTGCAG  
GCTGGCGGTCCGCCTCGCGGCGGTTTACTGCCTCCTGCTCCTCTTGCCGGTTTCCCTTGGTGCTCT  
TCGCTGGGGTGGCCGGGACGTTTACTTTGAAAAATTAGAGTGTTCAAAGCAGGCCCTGAATACTG  
GTGCATGGAATAATGGAATAGGACCTCGGATTTTGTGGTTTTTCGGAAGTCGAGGTAATGATTAAT  
AGGGACGGCGGGGGCATTGTATTGCGTCTGTAGAGGTGAAATTCTTGGATCGACGCAAGACAGAC  
TACAGCGAAGGCGTTTGCCAAGCACGTCTTCTTTAATCAAGAGCGACAGTCAGAGGTTCGAAGACG  
ATCAGATACCGTCTAGTCTGACCATAAACGATGCCAGCTAGGGATTTCGCCGGAGTTGTCTGACT  
CGGCGAGCACCTTCCGGGAAACCAAAGCTTTTGGGTTCCGGGGGAAGTATGGTTGCAAAGCTGAAA  
CTTAAAGGAATTGACGGAAGGGCACCACCAGGAGTGGAGCCTGCGGCTTAATTTGACTCAACACGG  
GGAAACTCACCCGGCCCCGGACACCGTAAGGATTGACAGATTGAGAGCTCTTTCTTGATTTCGGTGGG  
TGGTGGTGCATGGCCGTTCTTAGTTGGTGGAGCGATTTGTCTGGTTAATTCCGATAACGAACGAGA  
CTCTAGCCTATTTAAATAGTTTCGCCGATTTCGTCCGGCAAACCTTCTTAGAGGGACAAGTGGCGTTCAG  
CCACGCGAGATTGAGCAATAACAGGTCTGTGATGCCCTTAGATGTTTCGGGGCCGCACGCGCGCTAC  
ACTGAAGGACTCAGCGTGTCTTCTCCTGGCCAGAAATGGTCCGGCAACCCGTTGAACCTCCTTCGT  
GCTAGGGATTGGGGCTTGCAATCTTCCCCATGAACGAGGAATTTCCAGTAAGCGCGAGTCATCAG  
CTCGCGTTGATTACGTCCCTGCCCTTGTACACACCGCCCGTCGCTACTACCGATTGGATGGTTTA  
GTGAGACCCTCGGATTGGTCCCGACGGTGGGCGACCGCCGTCGTGGTGGCGAGAAGACGGTCAAAC  
TTGACTATCTAGAGGAAGTAAAAGT-CACTAAGCGGAGGAAAAGAACTAACCAGGATTCCCCTAG  
TAACGGCGAGTGAAGCGGAARAGCCCAGCACTGAATCCCCTGCATCGACTGTAGAGGGAAGTGT  
GTGTTCCGGGAGAGCCTCTGGGGCGACGGCGGCGTCCGAGTCTCCTGATCGGGGTTACCCAGAGCG  
GGTGTACGGCCTCTACGGCGGCTTCCGTGCTCCCTCTGTGCCTCCTAGGAGTCCGGTTGTTTGA  
ATGCAGCCCCAAGCGGGTGGTAAACTCCATCTAAGGCTAAATACTGGCACGAGACCGATAGCGGAC  
AAGTACCGTGAGGGAAAGTTGAAAAGAAGTTTGAAGAGAGAGTTCAAGAGTACGTGAAACCGTATA  
GAGGCAAACGGATGGGACCGCAGTCGATCCGCGGGATTAGCTTCTGCCGGGCGGGCTGCGGACCT  
TCACGGGGAGTGCATTTCCGCGGGGAGAGCGCCACGACCGCTTCTCGGGCCGTCAAGCTCCGGCG  
GAAGGTAGCTCGAGTGTATAGCCGCCGGTAGTGTCCGGCCGGGGGAGCGAGGAATGCCCGCCGGA  
GACCGGTCGACTGGCGAGGACTGCTCGCAGTGTCCGCGACTGCGCCGTTCCGGGCCACCCAGGGTC  
TGTGGCGAAGTCGGTTTCCCATCCGAC-

>Atherospio\_aestuarii\_P864

CGCCTTTAGATTAAAGGTATATTCTGCCCTATGTAAATGGCCGCGGTACCCTGACCGTGCTAAGGT  
AGCATAATAATTTGCCTCCTAATTAGAGGCTGGAATGAAGGAACTCACGAAAGTTTAACTGTTTCA  
TTTTTACTAAAACTATCATTCAAGTGAAGAGACTTGTATTTTATAAAAAGACAAAAGACCCCTAT  
TGAGCTTTATTCTACTTATTACCCTGATAAAGAATTTTGTGGGGCGACAAGAGAAGACTAAATCT  
TCTCAACCTCCTAAAAAGATCCGAGACGATCAAAAATCTAGCTACCCTAGGGATAACAGGCTAATC  
TTCTTTGAGAGCCCAAATTGACAAGAAGGATTGGCACCTCGATGTTGGCTTAGGGCACCAAATAAA  
TGCAGAAGTAAGTGGGTTTGTTCACCTTTAATACCCTATATGCTTGTCTCAAAGACTAAGCCATG  
CATGTCTAAGTACAAGCTCAACATGGTGAACCCGGAATGGCTCATTAAATCAGTTATGGTTCCTT  
AGATCGTACTATCCTACTTGGATAACTGTAGTAATTCTAGAGCTAATACATGCAATCAAGCTCCGA  
CCTCGCGGGAGGAGCGCTTTTATTAGACCAAACCAATGGGGGCGACTAACTTCTGGTGACTCTGG  
ATAACTTTGAGCTGATCGCACGGCCGCGCCGGCGACGTATCTTTCAAATGTCTGCCCTATCAAGTT  
TCGACGGTTGGTGACTTGCCAACCGTGCTGATAACGGGTAGCGGGGAATCAGGGTTCGATTCCGGA  
GAGGGAGCATGAGAAACGGCTACCACATCCAAGGAAGGCAGCAGGCGCGCAAATTACCCACTCCTA  
GCTCGGGGAGGTAGTGACGAAAAATAACAATACGGGACTCTTACGAGGCCCCGTAATTGGAATGAG  
TACACTTTAAATCCTTTAACGAGGATCTATTGGAGGGCAAGTCTGGTGCCAGCAGCCGCGGTAATT  
CCAGCTCCAATAGCGTATATTAAGTTGTTGCAGTTAAAAAGCTCGTAGTTGGATCTCGGGTGCAG  
GCTGGCGGTCCGCCTCGCGGCGGTTTACTGCCTCCTGCTCCTCTTGCCGGTTTCCCTTGGTGCTCT  
TCGCTGGGGTGGCCGGGACGTTTACTTTGAAAAATTAGAGTGTTCAAAGCAGGCCCTGAATACTG  
GTGCATGGAATAATGGAATAGGACCTCGGATTTTGTGGTTTTTCGGAAGTCGAGGTAATGATTAAT  
AGGGACGGCGGGGGCATTGTATTGCGTCGTTAGAGGTGAAATTTCTTGGATCGACGCAAGACAGAC  
TACAGCGAAGGCGTTTGCCAAGCACGTCTTCTTTAATCAAGAGCGACAGTCAGAGGTTTCAAGACG  
ATCAGATACCGTCGTAGTTCTGACCATAAACGATGCCAGCTAGGGATTCGCCGGAGTTGTCTGACT  
CGGCGAGCACCTTCCGGGAAACCAAAGCTTTTGGGTTCCGGGGGAAGTATGGTTGCAAAGCTGAAA  
CTTAAAGGAATTGACGGAAGGGCACCACCAGGAGTGGAGCCTGCGGCTTAATTTGACTCAACACGG  
GGAAACTCACCCGGCCCGGACACCGTAAGGATTGACAGATTGAGAGCTCTTTCTTGATTGCGGTGGG  
TGGTGGTGCATGGCCGTTCTTAGTTGGTGGAGCGATTTGTCTGGTTAATTCGATAACGAACGAGA  
CTCTAGCCTATTAATAGTTCGCCGATTTCGTGCGCGAAACTTCTTAGAGGGACAAGTGGCGTTTCA  
CCACGCGAGATTGAGCAATAACAGGTCTGTGATGCCCTTAGATGTTCCGGGGCCGCACGCGCGCTAC  
ACTGAAGGACTCAGCGTGTCTTCTCCTGGCCAGAAATGGTGGGCAACCCGTTGAACCTCCTTCGT  
GCTAGGGATTGGGGCTTGCAATCTTCCCCATGAACGAGGAATTCAGTAAGCGCGAGTCATCAG  
CTCGGCTTGATTACGTCCCTGCCCTTTGTACACACCGCCCGTTCGCTACTACCGATTGGATGGTTTA  
GTGAGACCCTCGGATTGGTCCCGACGGTGGGCGACCGCCGTCGTGGTGGCGAGAAGACGGTCAAAC  
TTGACTATCTAGAGGAAGTAAAAGTTCACTAAGCGGAGGAAAAGAACTAACCCAGGATTCGCCCTAG  
TAACGGCGAGTGAAGCGGAAAAGCCCAGCACTGAATCCCCTGCATCGACTGTAGAGGGAAGTGTG  
GTGTTCCGGGAGAGCCTCTGGGGCGACGGCGGCGTCCGAGTCTCCTGATCGGGGTTACCCAGAGCG

GGTGT CAGGCCTCTACGGCGGCTTCCGTCGTCCCTCTGTGCCTCCTAGGAGTCGGGTTGTTTGAGA  
ATGCAGCCCAAAGCGGGTGGTAAACTCCATCTAAGGCTAAATACTGGCACGAGACCGATAGCGGAC  
AAGTACCGTGAGGGAAAGTTGAAAAGA ACTTTGAAGAGAGAGTTCAAGAGTACGTGAAACCGTATA  
GAGGCAAACGGATGGGACCGCAGTCGATCCGCGGGATT CAGCTTCTGCCGGGCGGGCTGCGGACCT  
TCACGGGGAGTGCAC TTTCCGCGGGGAGAGCGCCACGACCGCTTCTCGGGCCGTCAAGCKCCGGCG  
GAAGGTAGCTCGAGTGTATAGCCGCCGGTAGTGTCCGGCCGGGGGAGCGAGGAATGCCCGCCGGA  
GACCGGTCGACTGGCGAGGACTGCTCGCAGTGTCTCGCCGACTGCGCCGTTCCGGGCCACCCAGGGTC  
TGTGGCGAAGTCGGTTTCCCATCCGAC-

>Atherospio\_aestuarii\_H858

CGCCTTTAGATTAAAGGTATATTTCTGCCCTATGTAAATGGCCGCGGTACCCTGACCGTGCTAAGGT  
AGCATAATAATTTGCCCTCCTAATTAGAGGCTGGAATGAAGGA ACTCACGAAAGTTAACTGTTTCA  
TTTTTACTAAAACTATCATTCAAGTGAAGAGACTTGTATTTTATAAAAAGACAAAAGACCCCTAT  
TGAGCTTTTATTCTACTTATTACCCTGATAAAGAATTTTGTGGGGCGACAAGAGAAGACTAAATCT  
TCTCAACCTCCTAAAAAGATCCGAAGCGATCAAAAATCTAGCTACCCTAGGGATAACAGGCTAATC  
TTCTTTGAGAGCCCAAATTGACAAGAAGGATTGGCACCTCGATGTTGGCTTAGGGTACCAAATAAA  
TGCAGAAGTAAGTAGGTTTGTTC AACCTTTAATACCCTATATGCTTGTCTCAAAGACTAAGCCATG  
CATGTCTAAGTACAAGCTCAACATGGTGAACCGCGAATGGCTCATTAAATCAGTTATGGTTCCCTT  
AGATCGTACTATCCTACTTGGATAACTGTAGTAATTTCTAGAGCTAATACATGCAATCAAGCTCCGA  
CCTCGCGGGAGGAGCGCTTTTATTAGACCAAAACCAATGGGGGCGACTAACTTCTGGTGACTCTGG  
ATAACTTTGAGCTGATCGCACGGCCGCGCCGGCGACGTATCTTTCAAATGTCTGCCCTATCAAGTT  
TCGACGGTTGGTGACTTGCCAACCGTGCTGATAACGGGTAGCGGGGAATCAGGGTTTCGATTCCGGA  
GAGGGAGCATGAGAAACGGCTACCACATCCAAGGAAGGCAGCAGGCGCGCAAATTACCCACTCCTA  
GCTCGGGGAGGTAGTGACGAAAATAACAATACGGGACTCTTACGAGGCCCCGTAATTGGAATGAG  
TACACTTTAAATCCTTTAACGAGGATCTATTGGAGGGCAAGTCTGGTGCCAGCAGCCGCGGTAATT  
CCAGCTCCAATAGCGTATATTTAAAGTTGTTGCAGTTAAAAAGCTCGTAGTTGGATCTCGGGTGCAG  
GCTGGCGGTCCGCCTCGCGGCGGTTTACTGCCTCCTGCTCCTCTTGCCGGTTTCCCTTGGTGCTCT  
TCGCTGGGGTGGCCGGGACGTTTACTTTGAAAAAATTAGAGTGTTC AAAGCAGGCCCTGAATACTG  
GTGCATGGAATAATGGAATAGGACCTCGGATTTTGTGGTTTTTCGGAAGTCGAGGTAATGATTAAT  
AGGGACGGCGGGGGCATTGTATTGCGTCTTAGAGGTGAAATTTCTGGATCGACGCAAGACAGAC  
TACAGCGAAGGCGTTTGCCAAGCACGTCTTCTTTAATCAAGAGCGACAGTCAGAGGTTCGAAGACG  
ATCAGATACCGTCGTAGTTCTGACCATAAACGATGCCAGCTAGGGATTCCGCCGGAGTTGTCTGACT  
CGGCGAGCACCTTCCGGGAAACCAAAGCTTTTGGGTTCCGGGGGAAGTATGGTTGCAAAGCTGAAA  
CTTAAAGGAATTGACGGAAGGGCACCACCAGGAGTGGAGCCTGCGGCTTAATTTGACTCAACACGG  
GGAAACTCACCCGGCCCGGACACCGTAAGGATTGACAGATTGAGAGCTCTTTCTTGATTCCGGTGGG  
TGGTGGTGCATGGCCGTTCTTAGTTGGTGGAGCGATTTGTCTGGTTAATTCGATAACGAACGAGA

CTCTAGCCTATTAATAGTTCGCCGATTTCGTGCGCGAAACTTCTTAGAGGGACAAGTGGCGTTCAG  
CCACGCGAGATTGAGCAATAACAGGTCTGTGATGCCCTTAGATGTTTCGGGGCCGCACGCGCGCTAC  
ACTGAAGGACTCAGCGTGTCTTCTCCTGGCCAGAAATGGTTCGGGCAACCCGTTGAACCTCCTTCGT  
GCTAGGGATTGGGGCTTGCAATTCTTCCCCATGAACGAGGAATCCCAGTAAGCGCGAGTCATCAG  
CTCGCGTTGATTACGTCCCTGCCCTTGTACACACCGCCCGTTCGCTACTACCGATTGGATGGTTTA  
GTGAGACCCTCGGATTGGTCCCGACGGTGGGCGACCGCCGTCGTGGTGGCGAGAAGACGGTCAAAC  
TTGACTATCTAGAGGAAGTAAAAGTTCACTAAGCGGAGGAAAAGAACTAACCCAGGATTCCCCTAG  
TAACGGCGAGTGAAGCGGAAGAGCCCAGCACTGAATCCCCTGCATCGACTGTAGAGGAACTGTA  
GTGTTTCGGGAGAGCCTCTGGGGCGACGGCGGCGTCCGAGTCTCCTGATCGGGGTTACCCAGAGCG  
GGTGTTCAGGCCTCTACGGCGGCTTCCGTCGTCCCTCTGTGCCTCCTAGGAGTTCGGGTTGTTTGA  
ATGCAGCCCAAAGCGGGTGGTAAACTCCATCTAAGGCTAAATACTGGCACGAGACCGATAGCGGAC  
AAGTACCGTGAGGGAAAGTTGAAAAGAAGTTTGAAGAGAGAGTTCAAGAGTACGTGAAACCGTATA  
GAGGCAAACGGATGGGACCGCAGTCGATCCGCGGGATTTCAGCTTCTGCCGGGCGGGCTGCGGACCT  
TCACGGGGAGTGCACCTTCCGCGGGGAGAGCGCCACGACCGCTTCTCGGGCCGTCAAGCTCCGGCG  
GAAGGTAGCTCGAGTGTATAGCCGCCGGTAGTGTGCGCCGGGGGAGCGAGGAATGCCCGCCGGA  
GACCGGTTCGACTGGCGAGGACTGCTCGCAGTGTGCGCGACTGCGCCGTTTCGGGCCACCCAGGGTC  
TGTGGCGAAGTCGGTTTCCCATCCGACC

>Atherospio\_aestuarii\_P865

CGCCTTTAGATTAAAGGTATATTCTGCCCTATGTAAATGGCCGCGGTACCCTGACCGTGCTAAGGT  
AGCATAATAATTTGCCTCCTAATTAGAGGCTGGAATGAAGGAACTCACGAAAGTTTAACTGTTTCA  
TTTTTACTAAAACTATCATTCAAGTGAAGAGACTTGTATTTTATAAAAAGACAAAAGACCCCTAT  
TGAGCTTTATTCTACTTATTACCCTGATAAAGAATTTTGTGGGGCGACAAGAGAAGACTAAATCT  
TCTCAACCTCCTAAAAAGATCCGAAGCGATCAAAAATCTAGCTACCCTAGGGATAACAGGCTAATC  
TTCTTTGAGAGCCCAAATTGACAAGAAGGATTGGCACCTCGATGTTGGCTTAGGGTACCAAATAAA  
TGCAGAAGTAAGTAGGTTTGTTCACCTTTAATACCCTATATGCTTGTCTCAAAGACTAAGCCATG  
CATGTCTAAGTACAAGCTCAACATGGTGAACCGCGAATGGCTCATTAAATCAGTTATGGTTCCTT  
AGATCGTACTATCCTACTTGGATAACTGTAGTAATTCTAGAGCTAATACATGCAATCAAGCTCCGA  
CCTCGCGGGAGGAGCGCTTTTATTAGACCAAACCAATGGGGGCGACTAACTTCTGGTGACTCTGG  
ATAACTTTGAGCTGATCGCACGGCCGCGCCGGCGACGTATCTTTCAAATGTCTGCCCTATCAAGTT  
TCGACGGTTGGTGACTTGCCAACCGTGCTGATAACGGGTAGCGGGGAATCAGGGTTCGATTCCGGA  
GAGGGAGCATGAGAAACGGCTACCACATCCAAGGAAGGCAGCAGGCGCGAAATTACCCACTCCTA  
GCTCGGGGAGGTAGTGACGAAAATAACAATACGGGACTCTTACGAGGCCCCGTAATTGGAATGAG  
TACACTTTAAATCCTTTAACGAGGATCTATTGGAGGGCAAGTCTGGTGCCAGCAGCCGCGGTAATT  
CCAGCTCCAATAGCGTATATTAAGTTGTTGCAGTTAAAAGCTCGTAGTTGGATCTCGGGTGCAG  
GCTGGCGGTCCGCCTCGCGGCGGTTTACTGCCTCCTGCTCCTCTTGC CGGTTTCCCTTGGTGCTCT

TCGCTGGGGTGGCCGGGACGTTTACTTTGAAAAAATTAGAGTGTTCAAAGCAGGCCCTGAATACTG  
GTGCATGGAATAATGGAATAGGACCTCGGATTTTGTGGTTTTTCGGAAGTCGAGGTAATGATTAAT  
AGGGACGGCGGGGGCATTGTATTGCGTCGTTAGAGGTGAAATTCTTGGATCGACGCAAGACAGAC  
TACAGCGAAGGCGTTTGCCAAGCACGTCTTCTTTAATCAAGAGCGACAGTCAGAGGTTTGAAGACG  
ATCAGATACCGTCGTAGTTCTGACCATAAACGATGCCAGCTAGGGATTTCGCCGGAGTTGTCTGACT  
CGGCGAGCACCTTCCGGGAAACCAAAGCTTTTGGGTTCCGGGGGAAGTATGGTTGCAAAGCTGAAA  
CTTAAAGGAATTGACGGAAGGGCACCACCAGGAGTGGAGCCTGCGGCTTAATTTGACTCAACACGG  
GGAAACTCACCCGGCCCGGACACCGTAAGGATTGACAGATTGAGAGCTCTTTCTTGATTGCGGTGGG  
TGGTGGTGCATGGCCGTTCTTAGTTGGTGGAGCGATTTGTCTGGTTAATTCGATAACGAACGAGA  
CTCTAGCCTATTAATAGTTCGCCGATTTCGTCCGGCAAACCTTCTTAGAGGGACAAGTGGCGTTCAG  
CCACGCGAGATTGAGCAATAACAGGTCTGTGATGCCCTTAGATGTTCCGGGGCCGCACGCGCGCTAC  
ACTGAAGGACTCAGCGTGTCTTCTCCTGGCCAGAAATGGTCCGGCAAACCCGTTGAACCTCCTTCGT  
GCTAGGGATTGGGGCTTGCAATTCTTCCCATGAACGAGGAATTCAGTAAGCGCGAGTCATCAG  
CTCGCGTTGATTACGTCCCTGCCCTTTGTACACACCGCCCGTCGCTACTACCGATTGGATGGTTTA  
GTGAGACCCTCGGATTGGTCCCGACGGTGGGCGACCGCCGTCGTGGTGGCGAGAAGACGGTCAAAC  
TTGACTATCTAGAGGAAGTAAAAGT---CTAAGCGGAGGAAAAGAACTAACCCAGGATTCCCCTAG  
TAACGGCGAGTGAAGCGGAAGAGCCCAGCACTGAATCCCCTGCATCGACTGTAGAGGGAAGTGT  
GTGTTCCGGGAGAGCCTCTGGGGCGACGGCGGCGTCCGAGTCCTCCTGATCGGGGTTACCCAGAGCG  
GGTGTGAGCCCTCTACGGCGGCTTCCGTGTCCTCTGTGCCTCCTAGGAGTCGGGTTGTTTGAGA  
ATGCAGCCCAAAGCGGGTGGTAAACTCCATCTAAGGCTAAATACTGGCACGAGACCGATAGCGGAC  
AAGTACCGTGAGGGAAAGTTGAAAAGAAGTTTGAAGAGAGAGTTCAAGAGTACGTGAAACCGTATA  
GAGGCAAACGGATGGGACCGCAGTCGATCCGCGGGATTAGCTTCTGCCGGGCGGGCTGCGGACCT  
TCACGGGGAGTGCACCTTCCGCGGGGAGAGCGCCACGACCGCTTCTCGGGCCGTCAAGCTCCGGCG  
GAAGGTAGCTCGAGTGTATAGCCCGCGGTAGTGTGCGCCGGGGGAGCGAGGAATGCCCGCCGGA  
GACCGGTCGACTGGCGAGGACTGCTCGCAGTGTGCGCCGACTGCGCCGTTCCGGGCCACCCAGGGTC  
TGTGGCGAAGTCGGTTTCCCATCCGACC

>Atherospio\_aestuarii\_P866

CGCCTTTAGATTAAAGGTATATTCTGCCCTATGTAAATGGCCGCGGTACCCTGACCGTGCTAAGGT  
AGCATAATAATTTGCCTCCTAATTAGAGGCTGGAATGAAGGAACTCACGAAAGTTAACTGTTTCA  
TTTTTACTAAAACTATCATTCAAGTGAAGAGACTTGTATTTATAAAAAGACAAAAGACCCCTAT  
TGAGCTTTATTCTACTTATTACCCTGATAAAGAATTTTGTGGGGCGACAAGAGAAGACTAAATCT  
TCTCAACCTCCTAAAAAGATCCGAAGCGATCAAAAATCTAGCTACCCTAGGGATAACAGGCTAATC  
TTCTTTGAGAGCCCAAATTGACAAGAAGGATTGGCACCTCGATGTTGGCTTAGGGTACCAAATAAA  
TGCAGAAGTAAGTAGGTTTGTTC AACCTTTAATACCCTATATGCTTGTCTCAAAGACTAAGCCATG  
CATGTCTAAGTACAAGCTCAACATGGTGAACCCGCAATGGCTCATTAAATCAGTTATGGTTCCCTT



AGATCGTACTATCCTACTTGGATAACTGTAGTAATTCTAGAGCTAATACATGCAATCAAGCTCCGA  
CCTCGCGGGAGGAGCGCTTTTATTAGACCAAACCAATGGGGGCGACTAACTTCTGGTGACTCTGG  
ATAACTTTGAGCTGATCGCACGGCCGCGCCGGCGACGTATCTTTCAAATGTCTGCCCTATCAAGTT  
TCGACGGTTGGTGACTTGCCAACCGTGCTGATAACGGGTAGCGGGGAATCAGGGTTTCGATTCCGGA  
GAGGGAGCATGAGAAACGGCTACCACATCCAAGGAAGGCAGCAGGCGCGCAAATTACCCACTCCTA  
GCTCGGGGAGGTAGTGACGAAAAATAACAATACGGGACTCTTACGAGGCCCCGTAATTGGAATGAG  
TACACTTTAAATCCTTTAACGAGGATCTATTGGAGGGCAAGTCTGGTGCCAGCAGCCGCGGTAATT  
CCAGCTCCAATAGCGTATATTAAGTTGTTGCAGTTAAAAAGCTCGTAGTTGGATCTCGGGTGCAG  
GCTGGCGGTCCGCCTCGCGGCGGTTTACTGCCTCCTGCTCCTCTTGCCGGTTTCCCTTGGTGCTCT  
TCGCTGGGGTGGCCGGGACGTTTACTTTGAAAAATTAGAGTGTTCAAAGCAGGCCCTGAATACTG  
GTGCATGGAATAATGGAATAGGACCTCGGATTTTGTGGTTTTTCGGAAGTCGAGGTAATGATTAAT  
AGGGACGGCGGGGGCATTGTATTGCGTCTGTAGAGGTGAAATTTCTGGATCGACGCAAGACAGAC  
TACAGCGAAGGCGTTTGCCAAGCACGTCTTCTTTAATCAAGAGCGACAGTCAGAGGTTTCAAGACG  
ATCAGATACCGTCTAGTTCTGACCATAAACGATGCCAGCTAGGGATTTCGCCGGAGTTGTCTGACT  
CGGCGAGCACCTTCCGGGAAACCAAAGCTTTTGGGTTCCGGGGGAAGTATGGTTGCAAAGCTGAAA  
CTTAAAGGAATTGACGGAAGGGCACCACCAGGAGTGGAGCCTGCGGCTTAATTTGACTCAACACGG  
GGAAACTCACCCGGCCCCGGACACCGTAAGGATTGACAGATTGAGAGCTCTTTCTTGATTTCGGTGGG  
TGGTGGTGCATGGCCGTTCTTAGTTGGTGGAGCGATTTGTCTGGTTAATTTCCGATAACGAACGAGA  
CTCTAGCCTATTAATAGTTTCGCCGATTTCGTGCGCGAAACTTCTTAGAGGGACAAGTGGCGTTCAG  
CCACGCGAGATTGAGCAATAACAGGTCTGTGATGCCCTTAGATGTTTCGGGGCCGCACGCGCGCTAC  
ACTGAAGGACTCAGCGTGTCTTCTCCTGGCCAGAAATGGTTCGGGCAACCCGTTGAACCTCCTTCGT  
GCTAGGGATTGGGGCTTGCAATTTCTCCCATGAACGAGGAATTTCCAGTAAGCGCGAGTCATCAG  
CTCGGTTGATTACGTCCCTGCCCTTTGTACACACCGCCCGTCGCTACTACCGATTGGATGGTTTA  
GTGAGACCCTCGGATTGGTCCCGACGGTGGGCGACCGCCGTCGTGGTGGCGAGAAGACGGTCAAAC  
TTGACTATCTAGAGGAAGTAAAAGT-CACTAAGCGGAGGAAAAGAACTAACCAGGATTCCCCTAG  
TAACGGCGAGTGAAGCGGAAGAGCCCAGCACTGAATCCCCTGCATCGACTGTAGAGGGAAGTGA  
GTGTTTCGGGAGAGCCTCTGGGGCGACGGCGGCGTCCGAGTCTCCTGATCGGGGTTACCCAGAGCG  
GGTGTGAGGCCCTTACGGCGGCTTCCGTGCTCCCTCTGTGCCTCCTAGGAGTTCGGGTTGTTTGA  
ATGCAGCCCCAAGCGGGTGGTAAACTCCATCTAAGGCTAAATACTGGCACGAGACCGATAGCGGAC  
AAGTACCGTGAGGGAAAGTTGAAAAGAAGTTTGAAGAGAGAGTTCAAGAGTACGTGAAACCGTATA  
GAGGCAAACGGATGGGACCGCAGTCGATCCGCGGGATTAGCTTCTGCCGGGCGGGCTGCGGACCT  
TCACGGGGAGTGCATTTCCGCGGGGAGAGCGCCACGACCGCTTCTCGGGCCGTCAAGCTCCGGCG  
GAAGGTAGCTCGAGTGTATAGCCGCCGGTAGTGTGCGCCGGGGGGAGCGAGGAATGCCCGCCGGA  
GACCGGTCGACTGGCGAGGACTGCTCGCAGTGTGCGCGACTGCGCCGTTTCGGGCCACCCAGGGTC  
TGTGGCGAAGTCGGTTTCCCATCCGACC

>Amphicorina\_mobilis

TGCTTTCTGATAAAAAGTAATTCCTGCCCAGTGTAAACGGCCGCAGTACCCTGACTGTGCAAAGGT  
AGCATAATCGTTTGCCTCTTAATTGGAGGCTTGTATGAACGGATTCACGAGCGTCTAGCTATATTT  
ACCTT-ACGAAACCTAATATACCGGTGAAAAGCCGGTATTAAACTGAAAGACAAGAAGACCCTAT  
TGAGCTTTAACCAAACATTTTTTATAGTTCAAAGTTTAGTTGGGGCAACTAAAATTAATCAAATCC  
TACGCCTTCTAATACCTGATCCT--AAGATATCAGAAATAGCTACCTTAGGGATAACAGGCTAATT  
TCTTTTAAGAGTACAAATTAACAAAGAAGTTTGGCACCTCGATGTTGGCTTAGGGACCCTGTTTAG  
TGCAGCTGCAGGTGGGCTTGTTCATCCCTTAATACCCT-----  
-----ATTCATTAGACCGTCAC  
AGCCTCGGTTGTCTGACGTGGATAACTGTGGTAATTCTAGAGCTAATACATGCATACAAGCTCCGA  
CCTTCGGGGAAGAGCGCTTTTATTAGACCAAACCCGCGGCGTCGGCCCCCTTTTGGTGACTCTGG  
ATAACCTTGGGCTGATCGCACGGCCGCGCCGGCGACGAGTCTTTCAAGCGTATGCCCTATCAACTG  
TCGATGGTACGTGCTATGCCTACCATGGTTTTTACGGGTAACGGGGAATCAGGGTTCGATTCCGGA  
GAGGGAGCATGAGAAACGGCTACCACATCCAAGGAAGGCAGCAGGCGCGCAAATTACCCACTCCCC  
ACACGGGGAGGTAGTGACGAAAAATAACAATACGGGACTCTTTTCGAGGCCCCGTAATTGGAATGAG  
TACTCTTAAATCCTTTAACGAGGATCTATTGGAGGGCAAGTCTGGTGCCAGCAGCCGCGGTAATT  
CCAGCTCCAATAGCGTATATTAAGTTGTTGCAGTTAAAAAGCTCGTAGTTGGATCTCGGGTCCGG  
GCTGGCGGTCCCGTTCGCGCGGGC--ACTGCCTCCCG-----CCTACCGGCTCCCTTGGTGCTCT  
TCGCTGGGGTGGCCGGCGGCTTTACTTTGAAAAATTAGAGTGTTCAAAGCAGGCCCTGAATACCG  
ATGCATGGAATAATGGAATAGGACCTCGGATTTTGCTGGTTTCTGGATCTCGAGGTAATGATTAAG  
AGGGACGGCGGGGGCGTTAGTATTACGGTGTAGAGGTGAAATTCTTGGATCGCCGTAAGACTCAC  
GGTTGCGAAAGCGTTCGCCAAGAACGTTTTTATTGATCAAGAACGAAAGTCAGAGGTTTCAAGACG  
ATCAGATACCGTCGTAGTTCTGACCATAAACGATGCCAGCTAGGGATCGGCGGGCGTTGTGTGACT  
CCGCCGGCACCTTCGGGAAACCAAAGCTTTTGGGTTCCGGGGGAAGTATGGTTGCAAAGCTGAAA  
CTTAAAGGAATTGACGGAAGGGCACCACCAGGAGTGGAGCCTGCGGCTTAATTTGACTCAACACGG  
GAAAACCTCACCCGGCCCGGACACCGTAAGGATTGACAGATTGAGAGCTCTTTCTTGATTCCGGTGGG  
TGGTGGTGCATGGCCGTTCTTAGTTGGTGGAGCGATTTGTCTGGTTAATTCGATAACGAACGAGA  
CTCTAGCCTATTAATAGTTTCGCGGTTGCGTCGGCGTAACCTTCTTAGAGGGACAAGTGGCGTTTAG  
CCACGCGAGATTGAGCAATAACAGGTCTGTGATGCCCTTAGATGTTCCGGGGCCGCACGCGCGCTAC  
ACTGAAGGAATCAACGTGTC-TCTCCCGGTCCGGCAGGTCCGGGTAACCCGTTGAACCTCCTTCGT  
GCTAGGGATTGGGGCTTGTAACGTTCCCATGAACGAGGAATTCAGTAAGCGCGAGTCATAAG  
CTCGCGTTGATTACGTCCCTGCCCTTTGTACACACCGCCCGTCGCTACTACCGATTGGATGATTTA  
GTGAGGCCCTCGGATTGGTCCGCGCCGGGGTCTTCGGAGGCACTGTGCCGAGAAGACGGCCAAAC  
TTGATTATCTAGAGGAAGTAAAAGT-----CCACAG  
TAACGGCGAGTGAAGAGGGAAGAGCCCAGCACCGAATCCCCGCCTTGGCGGCTGGGGAAGTGTG  
GTGTTTGGGAGAGCCTCTGGTGCCTGCGCTCCGAGTCCCTCCTGATTGGGGTCCGCCGTAGCG





TCACTGGGGTGGCCGGAACGTTTACTTTGAAAAAATTAGAGTGTTCAAAGCAGGCCCTGAATAATG  
GTGCATGGAATAATGGAATAGGACCTCGGATTTTGTGGTTTTTCGGAACCTTGAGGTAATGATTAAG  
AGGGACAGCGGGGGCATTTCGTATTGCGGTGTTAGAGGTGAAATTCTTGGATCGCCGCAAGACGAAC  
TACTGCGAAAGCATTTCGCAAGCATGTTTTTCATTAATCAAGAACGAAAGTCAGAGGTTCGAAGACG  
ATCAGATACCGTCGTAGTTCTGACCATAAACGATGCCAGCTAGGGATTTCGCCGGAGTTGTATGACT  
CGGCGAGCACCTTCCGGGAAACCAAAGCTTTTGGGTTCCGGGGGAAGTATGGTTGCAAAGCTGAAA  
CTTAAAGGAATTGACGGAAGGGCACCACCAGGAGTGGAGCCTGCGGCTTAATTTGACTCAACACGG  
GAAACTCACCCGGCCCGGACACTGTAAGGATTGACAGATTGAGAGCTCTTTCTTGATTGCGGTGGG  
TGGTGGTGCATGGCCGTTCTTAGTTGGTGGAGCGATTTGTCTGGTTAATTCGATAACGAACGAGA  
CTCTAGCCTATTAATAGTTTCGCCGATACGTCGGCGCAACTTCTTAGAGGGACAAGTGGCGTTTAG  
CCACGCGAGATTGAGCAATAACAGGTCTGTGATGCCCTTAGATGTTCCGGGGCCGCACGCGCGCTAC  
ACTGAAGGAATCAGCGTGTGTTCTCCTGGCCAGAAATGGTCCGGTAACCCGTTGAACCTCCTTCGT  
GCTAGGGATTGGGGCTTGCAATTCCTCCCATGAACGAGGAATTCAGTAAGCGCGAGTCATCAG  
CTCGCGTTGATTACGTCCCTGCCCTTTGTACACACCGCCCGTCGCTACTACCGATTGGATGGTTTA  
GTGAGACCCTCGGATTGGTCCCGACGGTGGGCAACCGCCGTCGTGGCGCCGAAAAGACGGTCAAAC  
TTGACTATCTAGAGGAAGTAAAAGT-CACTAAGCGGAGGAAAAGAACTAACCCAGGATTCCCCTAG  
TAACGGCGAGTGAAGCGGAAGAGCCCAGCACCGAATCCCCTGCATTGACTGTAGCGGGACCTGTG  
GTGTTTGGGAGAGCCTCTGGGGCGCCGGCGGCGTCCGAGTCCCTCCTGATCGGGGTACCCAGAGCG  
GGTGTGAGGCTCTACGGCTTCCGCCGTCGTCCCTCTGTGCCTCCTAGGAGTCGGGTTGTTTGGGA  
ATGCAGCCCAAAGTGGGTGGTAAACTCCATCTAAGGCTAAATACTGGCACGAGTCCGATAGCGGAC  
AAGTACCGTGAGGGAAAAGTT-----  
-----  
-----  
-----  
-----  
-----

>Aurospio\_dibranchiata

-----GTGTTAACGGCCGCGGTACCCTGACCGTGCTAAGGT  
AGCATAATCATTTCCTTTTAATTGGAGGCTTGTATGAACGGACACACGAAAACGCAACTTTCTTA  
TCGAGGATAAAAATTAACCTTCAAGTGAAGAGACTTGAGTATCATAAAAAGACGAAAAGACCCCTAT  
GGAGCTTTACTTAAATTTTTTTTTTACTAAAAAGTTTTAGTTGGGGCGACTAAGGAGCAACACCACC  
CTCCTACTGACAAAAAAGATCCAACGTGA-TAAAAATCCAGCTACCCTAGGGATAACAGGCTAATC  
CTCCTTAAGAGCTCAAATTGACAGGAGGGCTTGGCACCTCGATGTTGGCTTAAGATCTCTACTAAG  
TGCAGCAGCTAGTAGGTTTGTTC AACCTTTAAAATCTTATATGCTTGTCTCAAAGACTAAGCCATG  
CATGTCTAAGTACAAGCTTAACATGGTGAACCGCGAATGGCTCATTAAATCAGTTATGGTTCCCTT





????????????????????????????????????????????????????????????????????????????????????  
????????????????????????????????????????????????????????????????????????????????????  
????????????????????????????????????????????????????????????????????????????????????  
????????????????????????????????????????????????????????????????????????????????????  
????????????????????????????????????????????????????????????????????????????????????  
????????????????????????????????????????????????????????????????????????????????????  
????????????????????????????????????????????????????????????????????????????????????  
????????????????????????????????????????????????????????????????????????????????????  
????????????????????????????????????????????????????????????????????????????????????

>Boccardia\_proboscidea

CGCCTCTAGATTAGAGGTCCATTCTGCCCTATGTAAATGGCCGCGGTAGCCTGACCGTGCTAAGGT  
AGCATAATCATTGTCGTTAATTGATGGCTGGAATGAATGAATATACGTAAGCTCAACTGTCTCC  
TTTTTAATAAAAAATTGACCCCAAGTGAAGAGACTTGGATTGACCAAAAAGACGAAAAGACCCAT  
AGAGCTTCACCTGACCTACTCGTCCAAGAGAAGGTTTAGTTGGGGCAACTAGAGAGTACTAAAACC  
TCTCTTCCAAAAAATTAGATCCGACACGACAGCAGAGAAAAGCTACCTTAGGGATAACAGGCTAATC  
CTCTTTGAGAGACCATATTGACAAGAGGGGTTGGCACCTCGATGTTGGCTCAAGGTTACAGCTTGA  
TGCAGCAGTTAGTGGGTTTGTTACCCCTTTAAATCCTTATATGCTTGTCTCAAAGACTAAGCCATG  
CATGTCTAAGTATAAGCTCTACACGGTGAACCGCGAATGGCTCATTAAATCAGTTATGGTTCCTT  
AGATCGTAAAATCCTACTTGGATAACTGTAGTAATTTAGAGCTAATACATGCACCTGAGCTCCGA  
CCCTCGGGAAAGAGCGCTTTTATTAGACCAAAACCAATGGCTCGCGCCAACCTTTGGTGACTCTGG  
ATAACTTC-AGCCGATCGCACGGCCGCGCCGGCAGCTATCTTTCAAATGTCTGCCCTATCAAGTT  
TCGATGGTTGGTGACTTGCCAACCATGCTTATAACGGGTAGCGGGGAATCAGGGTTTCGATTCCGGA  
GAGGGAGCATGAGAAACGGCTACCACATCCAAGGAAGGCAGCAGGCGCGCAAATTACCCACTCCTA  
GCTCGGGGAGGTAGTGACGAAAATAACAATACGGGACTCTTACGAGGCCCCGTAATTGGAATGAG  
TACACTTTAAATCCTTTAACGAGGATCTATTGGAGGGCAAGTCTGGTGCCAGCAGCCGGTAATT  
CCAGCTCCAATAGCGTATATTAAAGTTGTTGCAGTTAAAAAGCTCGTAGTTGGATCTCGGGGGCGG  
TCCGGCGGTCTCCTCGCGGAGGTT-ACTGTC-CTGCTCTCCTCACC GGCTTCCCCGGGTGCTCT  
TCGCTGAGGCGGCCGGAATGTTTACTTTGAAAAAATTAGAGTGTTCAAAGCAGGCCCTGAATATTG  
GCGCATGGAATAATGGAATAGGACCTCGGATTTTGTGGTTTTTCGGAAGTCGAGGTAATGATTAGT  
AGGGACGACGGGGCATTTCGTATTGCGCGGTTAGAGGTGAAATTTCTTGGATCCGCGCAAGACGAAC  
TACAGCGAAGGCGTCTGCCAAGTGCCTTCATTAATCAAGAGCGACAGTCAGAGGTTCAAGACG  
ATCAGATACCGTTCGTAGTTCTGACCATAAACGATGCCAGCTAGGGATGGGCGGACGTTGCACGACT  
CCGCCCCGACCTTCCGGGAAACCAAAGCTTTTGGGTTCCGGGGGAAGTATGGTTGCAAAGCTGAAA  
CTTAAAGGAATTGACGGAAGGGCACCACCAGGAGTGGAGCCTGCGGCTTAATTTGACTCAACACGG  
GGAAACTCACCCGGCCCGGACACCGTAAGGATTGACAGATTGAAAGCTCTTTCTTGATTTCGGTGGG  
TGGTGGTGCATGGCCGTTCTTAGTTGGTGGAGCGATTTGTCTGGTTAATTCGATAACGAACGAGA



CTCTAGCCTGCTAAATAGTTCGTGCGTTAGCCGGCGTAACTTCTTAGAGGGACAAGTGGCGTTCAG  
CCACGCGAGATTGAGCAATAACAGGTCTGTGATGCCCTTAGATGTTTCGGGGCCGCACGCGCGCTAC  
ACTGAAGGACTCAGCTGGT--TCTCCTGGCCTGAAAAGGTCTGGGCAAACCGTTGAACCTCCTTCGT  
GCTAGGGATTGGGGCTTGCAATTATCCCCATGAACGAGGAATCCCAGTAGGCGCGAGTCATCAG  
CTCGCGTCGATTACGTCCCTGCCCTTTGTACACACCGCCCGTCGCTACTACCGATCGGATGGTTTA  
GTGAGACCCTCGGACTGGCCCCGTCTGGCAGGCAACTGCTGACGTGTTGCCGGGAAGAAGGTGCAAC  
TTGACTATCTAGAGGAAGTAAAAGTTCACTAAGCGGAGGAAAAGAACTAACCCAGGATTCCCTTAG  
TAACGGCGAGTAAAACGGGAAGGGCCCAGCACCGAATCCCCTGCTTTT--AGTAGCGGGAACGTGT  
GTGTTTAGGAGAGCCTGTGGAGCTGCGG-AGCGTCCGAGTCCTTATGAAAGGGGGCGCCAGAGCG  
GGTGTCTAGTCTCTAGGACGCCCCGTCCAGTTGCTCAGTACCTCCTCGGAGTCGGGTTGTTTGA  
TTGCAGCCCCAAGCGGGTGGTAACTCCATCTAAGGCTAAATACTGGCACGAGACCGATAGCAAAC  
AAGTACCGTGAGGGAAAGTTGAAAAGAAGTTTGAAGAGAGAGTTCAAGAGTACGTGAAACCGTATA  
GAAGTAAACGGATGGGACCGCAGTGGACCGACGGGATTGAGTTCTTTC-GGGCGGATCGGAGACCT  
TCACCGGGAATGCACTTTCGTCGGGACAGCGCCACGACCGGTTCTTGGGCCGCCAGGCCCGGGG  
GAAGGTAGCTCGAGTGTATAGCCCTCCGGTGTTCGGGCCGGGGGACCGAGGAATACCCGCCGGA  
GACTGGTGGACTGGCGAGGACTGCTCGCAGTCTCGTCGACCGCGCTGTTTCGGGCCACCCAGGGTC  
TGTGGCGAAGTTGGCTACCCATCCGACC

>Dipolydora\_bidentata

CGCCTCCAGATTGGAGGTCCATTCTGCCCTATGTAAATGGCCGCGGTAGCCTGACCGTGCTAAGGT  
AGCATAATCATTGCGGTTTAATTGGTGGCTGGAATGAATGAATATACGAGAGCTCTACTGTCTCA  
TCTCTAATAAAAAATTGACCTTCAGGTGAAGAGACCTGAATTCCTTAAAAAGACGAAAAGACCCAT  
AGAGCTTTACCTAAATTATTCTTCAAGACAAAGGTTTAGTTGGGGCAACTAGAGAGAACTAAAACC  
TCTCTTTCTAAAAAATTGATCCGTTACGATATCAGAAAAAGCTACCTTAGGGATAACAGGCTAATC  
CTCTTTAAGAGACCATATTGACAAGAGGGTTTGGCACCTCGATGTTGGCTCAAGGTTACAGTCTGA  
TGCAGCAGTAAGTAGGTTTGTTCACCCTTTAAATCCTT-----  
-----TAAGCTCTACATGGTGAACCGCGAATGGCTCATTAAATCAGTTATGGTTCCTT  
AGATCTTAAAAATCCTACTTGGATAACTGTAGTAATTCTAGAGCTAATACATGCACCTGAGCTCCGA  
CCCGAGGGAAAGAGCGCTTTTATTAGACCAAACCAATGGTTCGCGCCAACCTTTGGTACTCTGG  
ATAACTTC-AGCTGATCGCAAGGCCGAGCCGGCGACGTATCTTTCAAATGTCTGCCCTATCAAGTT  
AAGATGGTTGGTACTTGCCAACCATGCTCGTAACGGGTAGCGGGGAATCAGGGTTCGATTCCGGA  
GAGGGAGCATGAGAAACGGCTACCACATCCAAGGAAGGCAGCAGGCGCGCAAATTACCCACTCCTG  
GATCGGGGAGGTAGTGACGAAAAATAACAATACGGGACTCTTACGAGGCCCGTAATTGGAATGAG  
TACACTTTAAATCCTTTAACGAGGATCTATTGGAGGGCAAGTCTGGTGCCAGCAGCCGCGTAATT  
CCAGCTCCAATAGCGTATATTAAAGTTGTTGCAGTTAAAAAGCTCGTAGTTGGATCTCGGGAGCGG  
TCCGGCGGTCCTCCGCAAGGAGGTTCACTGCCCGCCGCTTCCCTCACCGGCTTGGCCGGGTGCTCT







????????????????????????????????????????????????????????????????????????????????????????  
????????????????????????????????????????????????????????????????????????????????????????  
????????????????????????????????????????????????????????????????????????????????????????  
????????????????????????????????????????????????????????????????????????????????????????  
????????????????????????????????????????????????????????????????????????????????????????  
????????????????????????????????????????????????????????????????????????????????????????  
????????????????????????????????????????????????????????????????????????????????????????  
????????????????????????????????????????????????????????????????????????????????????????  
????????????????????????????????????????????????????????????????????????????????????????

>Laonice\_sp\_VR\_2006

-----  
-GCATAATCATTTCGCTCTTAATTGGTGGCTAGTATGAATGGACACACGAAAATAAGACTGTCTCC  
TTAATAATAAAAAATTAACCCCCACGTGAAGAGGCGTGGATACTACAGAAAGACAAAAAGACCCAT  
GGAGCTTTATTTACCGTAATACATAACCTAAAATTCAGTTGGGGCGACTGAGGAACAAACAAACC  
TTCCTTAAAACAAAAAGATCCGCTATGC-AACAGACTAAGCTACCCTAGGGATAACAGGCTAATT  
CTTCTTAAGAGCCCAAATTGACAGAAGAGA-----  
-----  
-----TGCGTACGAGCCTCGAACAGCGAAACCGCGAATGGCTCATTAAATCAGTTATGGTTCATT  
AGAGCTTTGCCAGTTACATGGATAACTGTAGTAATTCTAGAGCTAATACATGCCACCGAGCTCCGA  
CCCCGGGGGAAGAGCGCACTTATTAGACCACGATCAAC--GGGCAACCAGCATCTGGTGACTCTGG  
ATAACTTGAAGCGGATCGCAGGGCCGCGCCGGCGATTTCATTACAACGTCTGTGACCTATCAA--C  
TAGTAGGTAGGGTATACGCCTACCTAGGTGATGACGGGTAACGGGGAATCAGGGTTTCGATTCCGG  
GAGGGAGCATGAGAAACGGCTACCACATCCAAGGAAGGCAGCAGGCACGCAAATTACCCACTCCTG  
GCAAGGGGAGGTAGTGACGAAAAATAACAATACGGGACTCTTTCGAGGCCCCGTAATTGGAATGAG  
TACGATGTAATAATCCCTAACGAGGAAC TAATGGAGGGCAAGTCTGGTGCCAGCAGCCGCGGTAATT  
CCAGCTCCATTAGCGTATATTAAGCTGTTGCAGTTAAAAGCTCGTAGTTGGATCTGGGGAGCAG  
GCTGGCGGACCGCTTCGCTGCGGG--ACTGCCTCCTGCCCT-TCTGCCGGGCATGCAGGTTGCTCT  
TCGATGCGTGGCCCGCACTCTTACTTTGAAAAAATTAGAGTGCTCCAAACAGGCCCTGAATAATG  
CTGCATGGAATAATGGAACAGGACCTCGGGTGAAGTTGGTCGTCGGAACCCGAAGTAATGATCAAT  
AGGGGCTGCGGGGGCATCAGTATTCAGGGCGAGAGGTGAAATTCTATGACCCCTTGAAGACTCCC  
AAAAGCGAAAGCATTGCAAGAATGCCTTCTTTAATCAAGAACGAAAGTCAGAGGATCGAAGACG  
ATCAGATACCGTTCGTAGTTCTGACCGTAACGCTGGCGTCTGGTGATTGTGGGCGTGGGCGACCC  
TGACAGCAACCCCTCGGGAACCAAGATTTGGCTTCCGGGGGGAGTATGGTTGCAAAGCTGAAA  
CTTAAAGGAATTGACGGAAGGGCACCACCAGGAGTGGAGCCTGCGGCTTAATTTGACTCAACACGG  
GGAACCTCACCCGGCCCGGACACCGTAAGGATTGACAGATTGAGAGCTCTTTCTTGATTCGGTGGG  
TGGTGGTGCATGGCCGTTCTTAGTTGGTGGAGTGATTTGTCTGGTTAATTCGATAACGAACGAGA

CTCTAGCCTGCTAAATAGTTCGCCGATGCGTCGGCGCAACTTCTTAGAGGGACAGGCGGCTTTTAG  
CCGCATGAGATTGAGCAATAACAGGTCTGTGATGCCCTTAGATGTCTGGGGCCGCACGCGCGCTAC  
ACTGAAGGGATCAGCGTGCCT--CTCCTGTCCGAAAGGATCGGGTAACCCGTTGAACCTCCTTCGT  
GCTAGGGATAAGGGCCTGAAATTGCTCCCTTTGAACGAGGAATCCCAGTAAGCGCAAGTCATCAG  
CTTGCGTTGATTACGTCCCTGCCCTTTGTACACACCGCCCGTCGCTACTACCGATTGGATGGTTTA  
GTGAGACCCTCGGATCGACGCCCGCCGGCTCGTTCGGC----GGGAGTTGAGAAGAAGGTCAAAC  
TTGAAT-----TCACTAAGCGGAGGAAAAGAACTAACCAGGATTCCCCTAG  
TAACGGCGAGTGAAGAGGAAGAGCCCAGCACCGAATCCCCTACCTCGCGGGTTGCGGGAAGTGTG  
GTGTTTGGGAGAGCCTCTGAGGCGCCGGCGGCTTCCGAGTCTCCTTGACGGGGTTCGCCAGAGCG  
GGTGTGAGCCCTCTAGGTTGCCCGCCGGCTCTCTCTGAGCCTCCCCGGAGTCGGGTTGTTTGA  
TTGCAGCCCAAAGTGGGTGGTAAACTCCATCTAAGGCTAAATACTGGCACGAGACCGATAGCAAAC  
AAGTACTGTGAAGGAAAGTT-----  
-----  
-----  
-----  
-----

>Malacoceros\_cf\_indicus

CGCCTCTAGATTAGAGGTCCATCCTGCCCAATGTAAATGGCCGCGGTACCCTGACCGTGCAAAGGT  
AGCATAATAATTTGCCCCCTAATTAGGGGCTAGAATGAATGGACAAACGAGAGTTATACTGTCTCA  
CTATAAATAAAAATTAACCTTCAAGTGAAGAGGCTTG-ACAAGAAAAAAGACAAGAAGACCCCTAT  
TGAGCTTCATTTTATACCCACAAGAGGAAAAAATTTAGTTGGGGCGACTAAGGAGCATAAAAACC  
CTCCTTACTCCACAAAAGATCCGTAGCGATAGAAGAACTAGCTACCATAGGGATAACAGGCTAATC  
CTTCTCGAGAGCCCAAATTGACAGAAGGGATTGGCACCTCGATGTTGGCTTAGGAAAACACCAAAA  
TGCAGAAGTCAGCGGGTTTGTTCACCCTTAATATCCTATATGCTTGTCTCAAAGACTAAGCCATG  
CATGTCTAAGTACAAGCTCTACACGGTGAACCCGCAATGGCTCATTAAATCAGTTATGGTTCCTT  
AGATCGTACAATCCTACTTGGATAACTGTAGTAATTCTAGAGCTAATACATGCAAGCAAGCTCCGA  
CCTCCGGGAAGGAGCGCTTTTATTAGACAAAACCAATGTGGGCAACCTCTCGTTGGTACTCTGG  
ATAACTTTGAGCTGATCGCATGGCCGAGCCGGCGACGTATCTTTCAAATGTCTGCCCTATCAACTT  
TCGATGGTACGTGATATGCCTACCATGGTAGTAACGGGTAGCGGGGAATCAGGGTTCGATTCCGGA  
GAGGGAGCATGAGAAACGGCTACCACATCCAAGGAAGGCAGCAGGCGCGCAAATTACCCACTCCTG  
GCACGGGGAGGTAGTGACGAAAAATAACAATACGGGACTCTTTTCGAGGCCCCGTAATTGGAATGAG  
TACACTTTAAATCCTTTAACGAGGATCTATTGGAGGGCAAGTCTGGTGCCAGCAGCCGCGGTAATT  
CCAGCTCCAATAGCGTATATTAAGTTGTTGCAGTTAAAAAGCTCGTAGTTGGATCTCGGGAGCAG  
GCTGGCGGTCCGCCTCGCGGCGGTTTACTGCCCGTCTGCCCCAGCCGGTTTCCCCTGGTGTCTCT

TGGTTGGGGTGGCCGGAACGTTTACTTTGAAAAAATTAGAGTGTTCAAAGCAGGCCCTGAATAATG  
GTGCATGGAATAATGGAATAGGACCTCGGATTTTGTGGTTCGGAACTGGAGGTAATGATTAAG  
AGGGACGGCGGGGGCATTTCGTATTGCGGTGTAGAGGTGAAATTCTTGATCGCCGAAGACGAAC  
TACTGCGAAAGCGTTTGCCAAGCACGTTTTTCATTAGTCAAGAACGAAAGTCAGAGGTTCGAAGACG  
ATCAGATACCGTCGTAGTTCTGACCATAAACGATGCCAGCTAGGGATTTCGTGCGCGTTGTATGACT  
CGACGAGCACCTTCCGGGAAACCAAAGCTTTTGGGTCCGGGGGAAGTATGGTTGCAAAGCTGAAA  
CTTAAAGGAATTGACGGAAGGGCACACCAGGAGTGGAGCCTGCGGCTTAATTTGACTCAACACGG  
GGAAACTCACCCGGCCGGACACTGTAAGGATTGACAGATTGAGAGCTCTTCTTGATTGCGGTGGG  
TGGTGGTGCATGGCCGTTCTTAGTTGGTGGAGCGATTTGTCTGGTTAATTCGATAACGAACGAGA  
CTCTAGCCTATTAATAGTTCGCCGATTTCGTGCGCGCAACTTCTTAGAGGGACAAGTGGCGTTTAG  
CCACGCGAGATTGAGCAATAACAGGCTGTGATGCCCTTAGATGTTTCGGGGCCGCACGCGCGCTAC  
ACTGAAGGAATCAGCGTGTGTTCTCCTGGCCTGAAAAGGTGGGCAACCCGTTGAACCTCCTTCGT  
GCTAGGGATTGGGGCTTGCAATTCTTCCCATGAACGAGGAATTCAGTAAGCGCGAGTCATCAG  
CTCGCGTTGATTACGTCCCTGCCCTTGTACACACCGCCCGTCGCTACTACCGATTGGATGGTTTA  
GTGAGACCCTCGGATTGAACTTGACGGTGGGCAACTGCCGTCGAGGTG-CGAGAAGACGGTCAAAC  
TTGACTATCTAGAGGAAGTAAAAGT?????????????????????????????????????????  
?????????????????????????????????????????????????????????????????  
?????????????????????????????????????????????????????????????????  
?????????????????????????????????????????????????????????????????  
?????????????????????????????????????????????????????????????????  
?????????????????????????????????????????????????????????????????  
?????????????????????????????????????????????????????????????????  
?????????????????????????????????????????????????????????????????  
?????????????????????????????????????????????????????????????????  
?????????????????????????????????????????????????????????????????  
?????????????????????????????????????????????????????????????????  
?????????????????????????????????????????????????????????????????  
?????????????????????????????????????????????????????????????????  
?????????????????????????????????????????????????????????????????  
?????????????????????????????????????????????????????????????????  
?????????????????????????????????????????????????????????????????

>Malacoceros\_fuliginosus

-----  
-----AATTAGAGGCTGGAATGAATGAATATAACGAGAGTTAAGCTGTTTCA  
CTTCTAATAAAAACTAATCTTTAGGTGAAGAAGCCTAAATCATATAAAAAGACAAAAAGACCCAT  
TGAGCTTTACTAAAATAAAAATTTAATTTTGTAGTGGGGCGACAAAAGAAGACTAAATCT  
TCTTTATA-TAAAAATGATCCGAATCGATAACAAAAACAGCTACCATAGGGATAACAGGCTAATC  
TTCTTTGAGAGCCAAATTGACAAGAAGGATTGGCACCTCGATGTTGGCTTAGGATACCTGTTAGA  
TGCAGAAGTAAGTTGGTTTGTTCACCTTTAATATCCT-----TCTCAAAGATTAAGCCATG  
CATGTCTAAGTACAAGCTCCACAAGGTGAAACCGCGAATGGCTCATTAATCAGTTATGTTTCCCT





>Malacoceros\_sp\_V040

????????????????????????????????????????????????????????????????????????  
????????????????????????????????????????????????????????????????????????  
????????????????????????????????????????????????????????????????????????  
????????????????????????????????????????????????????????????????????????  
????????????????????????????????????????????????????????????????????????  
????????????????????????????????????????????????????????????????????????  
????????????????????????????????????????????????????????????????????????

-----  
-----  
-----  
-----  
-----  
-----  
-----  
-----  
-----  
-----  
-----  
-----  
-----  
-----  
-----  
-----  
-----  
-----  
-----  
-----

--GCGAGGCCCCCCCGGAAACATAAGCTTATGGGTTCCGGGGGAAGTATGGTTGCAAAACTGAAA  
CTTAAAGGAATTGACGGAAGGGCACCACCAGGAGTGGAGCCTGCGGCTTAATTTGACTCAACACGG  
GGAAACTCACC CGGCCCGACACCGTTAGGATTGACAGATTGAGAGCTCTTTCTTGATTGCGGTGGG  
TGGTGGTGCATGGCCGTTYTTAGTTGGTGGAGCGATTTGTCTGGTTAATTCGATAACGAACGAGA  
CTCTAGCCTATTA ACTAGTTTCGTCGATGCGTCGACGCAACTTCTTAGAGGGACTGGTGGCGTTTAG  
CCACACGAGAATGAGCAATAACAGGTCTGTGATGCCCTTAGATGTCCGGGGCCGCACGCGCCTAC  
ACTGAAGGACTCAGCGAGTA---TCCTGGCCAGAAATGGTCGGGCAACCCATTGAACCTCCTTCGT  
GCTAGGGATTGGGGTTTGCAATTCTCCCCATGAACGAGGAATTCAGTAAGCGCGAGTCATCAG  
CTCGCCTTGATTACGTCCCTGCCCTTGTACACACCGCCCGTCGCTACTACCGATTGGATGGCTTA  
GTGAGACCCTTGACTGGTCTCGAGGGCTGGAAACAGCCGCCCTGCTGCC-----  
-----  
-----  
-----  
-----  
-----GACTGTAGAGGGA ACTGTG  
GTGTTAGGGAGAGCCTCTGGGGCGTTGGCGGGCTCCAAGTCCTCCTGATCGGGGTGCCCATAGCG

GGTGTCAAGCCTTTACGATGGCTGCCGTCGTCCCTCTGTGCCTCCTAGGAGTCGGGTTGTTTGAGA  
ATGCAGCCCAAAGTGGGAGGTAAATTCCTTCTAAGGCTAAATACCAGCACGAGTCCGATAGCAAAC  
AAGTACCGTGAGGGAAAGTTGAAAAGAAGCTTTGAAGAGAGAGTTCAATAGTACGTGAAACCATGTA  
GAAGTAAACGGATGGGACCGCAGTCGAACCTCGGGATTAGCTCTCGCTT-GCTCGGTGAGGGACC  
TCTCGGGGAGTGCACTTTCCTGGTGGAGAGCGCCAGGACCGTTTTCTGGGCCGCCAAGCCCCGGGG  
GAAGGTAGCTCGAGTGTTATAGCCCCTGGAGGTGTTGGCCGGGGGGACCGCGGACTACCCGCCCGG  
CCCTGCCGTACTGTGGAGGACTGCTTGCAGTGCTCTGCGACCGCGTTGTTCCGGGTGTCCAGGGTT  
ACTGGCGTAGTCGGCAACCCATCCGACC

>Marenzelleria\_arctia

-----  
-GCATAATAATTTGCCTCTTAATTAGAGGCTGGAATGAATGAATATACGAGAGTCTAGCTGTTTCA  
TTTTTACTAAAAATTATCCTTTAAGTGAAGAGACTTAGATAGCATAAAAAGACAAAAGACCCAT  
TGAGCTTTATTTTACAAAATCTTTTCTCTAAAAATTTTGTGGGGCGACAAGAGAAGACTAAATCT  
TCTCTATTTTACAAAATGATCCGTAACGATAACAGAAACAGCTACCATAGGGATAACAGGCTAATC  
TTCTTTGAGAGCCCAAATTGACAAGAAGGA-----  
-----TAAGCCATG  
CATGTCTAAGTATAAGCTCGACAAGGTGAAACCGCGAATGGCTCATTAAATCAGTTATGGTTCCCT  
AGATCGTACTATCCTACTTGGATACCTGTAGTAATTCTAGAGCTAATACATGCACGGAAGCTCCGA  
CCCTCGGGGAAGAGCGCTTTTATTAGACCAAAACCAACGGGGGCAACCAATCTTTGGTGACTCTGG  
ATAACTTCGAGCGGATCGCACGGCCGCGCCGGCGACGTATCTTTCAAATGTCTGCCCTATCAAGTT  
TCGACGGTTCGGCGACATGCCTACCGTGCTTTAACGGGTAGCGGGGAATCAGGGTTTCGATTCCGGA  
GAGGGAGCATGAGAAACGGCTACCACATCCAAGGAAGGCAGCAGGCGCGCAAATTACCCACTCCTG  
GCTCGGGGAGGTAGTGACGAAAATAACAATACGGGACTCTTACGAGGCCCCGTAATTGGAATGAG  
TACACTTTAAATCCTTTAACGAGGATCCATTGGAGGGCAAGTCTGGTGCCAGCAGCCGCGGTAATT  
CCAGCTCCAATAGCGTATATTAAGTTGCTGCAGTTAAAAAGCTCGTAGTTGGATCTCGGGCGCGG  
GCCGGCGGTCCCCCTCGCGGGGTCAACTGCCTCCCGCGCTCCTGGTTCGGTGGCTCCGGATGCCCT  
TCGCTGGCGCAGCCGGCTGGTTTACTTTGAAAAAATTAGAGTGTTCAAAGCAGGCCCTGTATACCG  
TCGCATGGAATAATGGAATAGGACCTCGGATTTTGTGGTTGTTGGAG-TCGAGGTAATGATCAAT  
AGGGACGGCGGGGGCATTTCGTATTGCGCCGTTAGAGGTGAAATTCCTGGATCGGCGCAAGACGAAC  
TAAAGCGAAAGCAATTGCCAAGAGCGTCTTCTTTAATCAAGAGCGACAGTCAGAGGTTCGAAGACG  
ATCAGATACCGTCGTAGTTCTGACCATAAACGATGCCAGCTGGCGATGTGCCGGAGTTGTATGACT  
CTGCACGCAGTCTCCGGGAAACCAAAGCTTTTGGGTTCCGGGGGAAGTATGGTTGCAAAGCTGAAA  
CTTAAAGGAATTGACGGAAGGGCACCACCAGGAGTGGAGCCTGCGGCTTAATTTGACTCAACACGG  
GGAAACTCACCCGGCCCGGACACCGTAAGGATTGACAGATTGAGAGCTCTTTCTTGATTCCGGTGGG  
TGGTGGTGCATGGCCGTTCTTAGTTGGTGGAGCGATTTGTCTGGTTAATTCGATAACGAACGAGA

CTCTAGCCTATTAATAGTTCGCCGGTTTGCCGGCGTAACTTCTTAGAGGGACAAGTGGCGTTCAG  
CCACGCGAGAGTGAGCAATAACAGGTCTGTGATGCCCTTAGATGTTTCGGGGCCGCACGCGCTAC  
ACTGAAGGACTCAGCACGTCTTTTCCCGGCCAGAAATGGTCGGGCAACCCGTTGAACCTCCTTCGT  
GCTAGGGATTGGGGCTTGCAATTCTTCCCATGAACGAGGAATCCCAGTAAGCGCGAGTCATCAG  
CTCGCGTTGATTACGTCCCTGCCCTTGTACACACCGCCCGTCGCTACTACCGATTGGATGGTTTA  
GTGAGACCCTCGGACTGGTCCCGGGCGGGCGACCGCTGCCGAGGTGCTGGGAAGACGGTTCGAAC  
TTGACTATCTAGAGGAAGTAAAAGTTCACTAAGCGGAGGAAAAGAACTAACCCAGGATTCCCCTAG  
TAACGGCGAGTGAAGAGGGAAAAGCCCAGCACCGAATCCCCTGCATAGACTGTAGCGGGAACGTG  
GTGTTTCGGGAGAGCCTCTGGAGCGGGAC-GGCGTCCGAGTCCTTCTGATCGGGTTACCCAGAGCG  
GGTGTTAGGCCTCTACGGCGCCGCTTCCGTTCTCTGTGCCTCCAGGAGTCGGGTTGTTTTCGA  
ATGCAGCCCAAAGTGGGTGGTAAACTCCATCTAAGGCTAAATACTGGCGCGAGTCCGATAGCGGAC  
AAGTACCGTGAGGGAAAGTT-----  
-----  
-----  
-----  
-----  
-----

>Marezzelleria\_viridis

-----  
-----AATTAGAGGCTGGAATGAATGAATATACGAGAGTTTAGCTGTTTCA  
TTTTTACTAAAAATTATCCTTTAAGTGAAGAGACTTAAATAAAAATAAAAAGACAAAAGACCCCTAT  
TGAGCTTTATTTTATAAACTTTACCTACAGAAATTTTGTGGGGCAACAAGAGAAGACTAAATCT  
TCTCTATACTACAAAATGATCCGAAACGATAACAGAACCAGCTACCATAGGGATAACAGGCTAATC  
TTCTTTGAGAGCCCAAATTGACAAGAAGGATTGGCACCTCGATGTTGGCTTAGGATACCTGATAGA  
TGCAGAAGTAAGTGGGTTTGTTCACCTTTAATATCCTATATGCTTGTCTCAAAGACTAAGCCATG  
CATGTCTAAGTATAAGCTCGACAAGGTGAAACCGCAATGGCTCATTAAATCAGTTATGGTTCCTT  
AGATCGTACTATCCTACTTGGATACCTGTAGTAATTCTAGAGCTAATACATGCACGGAAGCTCCGA  
CCCCGGGGAAGAGCGCTTTTATTAGACAAAACCAACGGGGGCGACTAAACTTTGGTGACTCTGG  
ATAACTTCGAGCGGATCGCACGGCCGCGCCGGCGACGTATCTTTCAAATGTCTGCCCTATCAAGTT  
TCGACGGTCGGCGACATGCCTACCGTGCTTATTACGGGTAGCGGGGAATCAGGGTTCGATTCCGGA  
GAGGGAGCATGAGAAACGGCTACCACATCCAAGGAAGGCAGCAGGCGCGCAAATTACCCACTCCTG  
GCTCGGGGAGGTAGTGACGAAAATAACAATACGGGACTCTTACGAGGCCCCGTAATTGGAATGAG  
TACACTTTAAATCCTTTAACGAGGATCCATTGGAGGGCAAGTCTGGTGCCAGCAGCCGCGTAATT  
CCAGCTCCAATAGCGTATATTAAGTTGCTGCAGTTAAAAGCTCGTAGTTGGATCTCGGGCGCGG  
CGCGGGTCCCCCTCGCGGGGTTCACTGCCTCCCGCGCCCCTGGCCGGTACGCCGGGTGCCCT

TCGCTGGTGCAGCCGGCTGGTTTACTTTGAAAAAATTAGAGTGTTCAAAGCAGGCCCTGCATACCG  
TCGCATGGAATAATGGAATAGGACCTCGGATTTTGTGGTTGTTGGAG-TCGAGGTAATGATCAAT  
AGGGACGGCGGGGGCATTTCGTATTGCGCCGTTAGAGGTGAAATTCTTGGATCGGCGCAAGACGAAC  
TAGAGCGAAAGCAATTGCCAAGAGCGTCTTCTTTAATCAAGAGCGACAGTCAGAGGTTCGAAGACG  
ATCAGATAACCGTCGTAGTTCTGACCATAAACGATGCCAGCTGGCGATGTGCCGGAGTTGTATGACT  
CTGCACGCAGCCCCGGGAAACCAAAGCTTTTGGGTTCCGGGGGAAGTATGGTTGCAAAGCTGAAA  
CTTAAAGGAATTGACGGAAGGGCACCACCAGGAGTGGAGCCTGCGGCTTAATTTGACTCAACACGG  
GGAAACTCACCCGGCCCGGACACCGTAAGGATTGACAGATTGAGAGCTCTTTCTTGATTTCGGTGGG  
TGGTGGTGCATGGCCGTTCTTAGTTGGTGGARCGATTTGTCTGGTTAATTCGATAACGAACGAGA  
CTCTAGCCTATTAATAGTTTCGCCGTTTCGCCGGCGTAACCTTCTTAGAGGGACAAGTGGCGTTCAG  
CCACGCGAGAGTGAGCAATAACAGGTCTGTGATGCCCTTAGATGTTCCGGGGCCGCACGCGCGCTAC  
ACTGAAGGACTCAGCACGTCTTCTCCCGGCCAGAAATGGTCCGGCAACCCGCTGAACCTCCTTCGT  
GCTAGGGATTGGGGCTTGCAATCTTCCCATGAACGAGGAATTCAGTAAGCGCGAGTCATCAG  
CTCGCGTTGATTACGTCCCTGCCCTTTGTACACACCGCCCGTTCGCTACTACCGATTGGATGGTTTA  
GTGAGACCCTCGGACCGTCCCGGCGGCGGGCGACCGCTGCCGAGGTGCTGGGAAGACGGTTCGAAC  
TTGACTATCTAGAGGAAGTAAAAGTTCACTAAGCGGAGGAAAAGAACTAACCCAGGATTCCTTAG  
TAACGGCGAGTGAAGAGGGAAAAGCCCAGCACCGAATCCCGGCGTTCGACCGTTCGAGGGAAGTGTG  
GTGTTCCGGGAGAGCCTCTGGAGCGGGAC-GGCGTCCGAGTCCTTCTGATAGGGGTTACCCAGAGCG  
GGTGTTAGGCCTCTACGGCGCCGCTTTCCGTTCTCTGCGCCTCCAGGAGTCCGGTTGTTTGCGA  
ATGCAGCCCAAAGTGGGTGGTAAACTCCATCTAAGGCTAAATACTGGCGCGAGTCCGATAGCGGAC  
AAGTACCGTGAGGGAAAGTTGAAAAGAAGTTTGAAGAGAGAGTTCAAGAGTACGTGAAACCGTATA  
GAGGCAAACGGATGGGACCGCAGTCGACCCTCGGAATTCAGCTTTTCGCCCCGCTAGCTAGGGACCT  
TCACCGGGAGTGACTTTTCGGGGGGAGAGCGCCGCGACCGGTTCCCGGGCCGTCAGCTCCGGCGG  
GAAGGTAGCTCGAGTGTACAGCCCCCGGCAG--TTGGCCGGGGGGACCGAGGAATACCCGCCAAA  
GACTGGTTCGACTGGCGAGGACTGCTCGCAGTGTCTGCCGACTGCGCCGCTCGAGACCACTCGGGTC  
TGCGGCGAAGTCGGTTTCCCATCCGACC

>Microspio\_granulata

-----AGGT  
AGCATAATCATTGTCTTTAATTGGAGACTAGTATGAACGAGAATATGCCTCACCTACTTTTCTA  
ATTTAAACTGAAATTAATCTATAGGTGAATAAGCCTATATTATAAATAAAGACAGAAAGACCCAT  
AGAGCTTTATCCTCATAATCATATGAATAAAGGATTTTATTGGGGCAATATAAGATTACATAAACA  
TCTTAATATACAG-----TCACTAGATAGCTACCTTAGGGATAACAGACTAATA  
TATTAATAAAGCTCTTATTTGTTAATTTGCTTAGTACCTCGATGTTGGTTTAGGGTTTCCAATTGG  
TGTAGCCGCGGGATGGGTGTTTACCCATTAA-----  
-----GTATAAGCTCTACACGGCGAAACCGCGAATGGCTCATTAATCAGTTATGGTTCCTT





????????????????????????????????????????????????????????????????????????????????????  
????????????????????????????????????????????????????????????????????????????????????  
????????????????????????????????????????????????????????????????????????????????????  
????????????????????????????????????????????????????????????????????????????????????  
????????????????????????????????????????????????????????????????????????????????????  
????????????????????????????????????????????????????????????????????????????????????  
????????????????????????????????????????????????????????????????????????????????????  
????????????????????????????????????????????????????????????????????????????????????  
????????????????????????????????????????????????????????????????????????????????????

>Paraprionospio\_patiens

CGCCTCTAGATTAGAGGTTTCATCCTGCCAGTGTCAACGGCCGCGGTATCCTGACCGTGCTAAGGT  
AGCATAATCGTTTGCCTTTAATTGAAGGCTGGTATGAATGGACAAACGAAAGTACATCTGTATCA  
TTAAAGATGAAAATTATCTTTTAGGTGAAGAGCCCTGAATTTTTTAAAAAGACGAAAAGACCCAT  
GGAGCTTTACTTATCTTATTCGTAGTTAATAAAGTTTAGTTGGGGCGACTAAGGAACAATGAAAGC  
TTCCTATAAATTTAATTTATCCGTTACGA-TATGGAACCAGCTACCCTAGGGATAACAGGCTAATC  
CTCTTCGAGAGTTCAAATTTACAAGAGGGGTTGGCACCTCGATGTTGGCTTAAGGCTTCTTTTTGG  
CGCAGCAGCAAGTGGGTTTGTTC AACCTTTAAAGCCTT-----G  
CATGTCTAAGTACAAGCTTAACACGGTGAACCGCGAATGGCTCATTAAATCAGTTATGGTTCCTT  
AGATCGTACAATCCTACTTGGATAACTGTAGTAATTTCTAGAGCTAATACATGCAAGCAAGCTCCGA  
CCTTCGGGAAAGAGCGCTTTTATTAGACCAAACCAAT--GGGCAACTTCTAGTTGGTGACTCTGG  
ATAACTTTGAGCTGATCGCACGGCCGAGCCGGCGACGTATCTTTCAAATGTCTGCCCTATCAACTT  
TCGACGGTACGTGACATGCCTACCGTGGTTGTAACGGGTAACGGGGAATCAGGGTTTCGATTCCGGA  
GAGGGAGCATGAGAAACGGCTACCACATCCAAGGAAGGCAGCAGGCGCGCAAATTACCCACTCCTG  
GCACGGGGAGGTAGTGACGAAAATAACAATACGGGACTCTTTCGAGGCCCCGTAATTGGAATGAG  
TACTTTTAAATCCTTTAACGAGGATCTATTGGAGGGCAAGTCTGGTGCCAGCAGCCGCGG-----  
-----CAATAGCGTATATTAAAGTTGTTGCAGTTAAAAAGCTCGTAGTTGGATCTCGGGAGCAG  
GCCGGCGGTCCGCCTCGCGGCGG-CTACTGCCTGTCTGCCCCCTGCCGGTTTCCCTCGGTGCTCT  
TCGCTGGGGTGGCCGGAACGTTTACTTTGAAAAAATTAGAGTGTTCAAAGCAGGCCCTGAATAATG  
GTGCATGGAATAATGGAATAGGACCTCGGATTTTGTGGTTTTTCGGAGCTCGAGGTAATGATTAAG  
AGGGACGGCGGGGGCATTTCGTATTGCACTGTTAGAGGTGAAATTTCTGGATCGGTGCAAGACGAAC  
TACTGCGAAAGCATTGCAAGAATGTTTTTATTAATCAAGAACGAAAGTCAGAGGTTTCAAGACG  
ATCAGATACCGTTCGTAGTTCTGACCATAAACGATGCCAGCTAGGGATTTCGCCGGAGTTGTATGACT  
CGGCGAGCACCTTCCGGGAAACCAAAGCTTTTGGGTTCCGGGGGAAGTATGGTTGCAAAGCTGAAA  
CTTAAAGGAATTGACGGAAGGGCACCACCAGGAGTGGAGCCTGCGGCTTAATTTGACTCAACACGG  
GAAACTCACCCGGCCCGGACACCGTAAGGATTGACAGATTGAGAGCTCTTCTTGATTTCGGTGGG  
TGGTGGTGCATGGCCGTTCTTAGTTGGTGGAGCGATTTGTCTGGTTAATTCGATAACGAACGAGA

CTCTAGCCTATTAATAGTTCGCCGATTTCGTCCGGCGCAACTTCTTAGAGGGACAAGTGGCGTTTAG  
CCACGCGAGATTGAGCAATAACAGGTCTGTGATGCCCTTAGATGTTTCGGGGCCGCACGCGCGCTAC  
ACTGAAGGAATCAGCGTGTGTTCTCCTGGCCAGAAATGGTCGGGTAACCCGTTGAACCTCCTTCGT  
GCTAGGGATTGGGGTTTGC AATTATCCCCATGAACGAGGAATCCCAGTAAGCGCGAGTCATCAG  
CTCGCGTTGATTACGTCCCTGCCCTTTGTACACACCGCCCGTCGCTACTACCGATTGGATGGTTTA  
GTGAGACCCTCGGATTGGTCCCGGAGGTGGGCAACCGCCACCGTGGCGCCGAAAAGACGGTCAAAC  
TTGACTATCTAGAGGAAGTAAAAGT?????????????????????????????????????????  
?????????????????????????????????????????????????????????????????  
?????????????????????????????????????????????????????????????????  
?????????????????????????????????????????????????????????????????  
?????????????????????????????????????????????????????????????????  
?????????????????????????????????????????????????????????????????  
?????????????????????????????????????????????????????????????????  
?????????????????????????????????????????????????????????????????  
?????????????????????????????????????????????????????????????????  
?????????????????????????????????????????????????????????????????  
?????????????????????????????????????????????????????????????????  
?????????????????????????????????????????????????????????????????  
?????????????????????????????????????????????????????????????????  
?????????????????????????????????????????????????????????????????  
?????????????????????????????????????????????????????????????????

>Poecilochaetus\_serpens

CGCCTCCAGATTGGAGGTCCATCCTGCCCAATGTAAATGGCCGCGGTACCCTGACCGTGCAAAGGT  
AGCATAATCATTTCCTCCTAATTAGAGGCTAGTATGAATGGACACACGAGAGTCAAGCTGTTTCA  
CTCTTAATAAAAAATTAATCTTCAGGTGAAAAAGCCTGAATTAAATAAAAAAGACAAAAAGACCCAT  
TGAGTTTTATTGGAACCAGAAAAAGCAGAACCAATTTAGTTGGGGCGACTGAGGAAGAATTAATC  
TTCCTTACAAATAAAATGATCCGATACGATAAAAAGAAAGAACTACCATAGGGATAACAGGCTAATT  
TTCTTTGAGAGTCCATATTGACAAGAAAGTTTGGCACCTCGATGTTGGCTTAGAATACCTATAA--  
-----ATATGCTTGTCTCAAAGACTAAGCCATG  
CATGTCTAAGTACAAGCTTAACAAGGTGAAACCGCGAATGGCTCATTAAATCAGTTATGGTTCCTT  
AGATCGTTCATCCTACTTGGATAACTGTAGTAATTCTAGAGCTAATACATGCCAGCAAGCTCCGA  
CCTTACGGGAAGAGCGCTTTTATTAGACCAAACCAAC--GGGCAACCAAAGCTTGGTGACTCTGG  
ATAACTTTGTGCCGATCGCACGGCCGCGCCGGCGACGTATCTTCAAATGTCTGCCCTATCAACTT  
TCGATGGTACGTGCTATGCCATCCATGGTTGTAACGGGTAACGGGGAATCAGGGTTCGATTCCGGA  
GAGGGAGCATGAGAAACGGCTACCACATCCAAGGAAGGCAGCAGGCGCGAAATTACCCACTCCTG  
GCACGGGGAGGTAGTGACGAAAAATAACAATACGGGACTCTTTCGAGGCCCGTAATTGGAATGAG  
TACACTTTAAATCCTTTAACGAGGATCTATTGGAGGGCAAGTCTGGTGCCAGCAGCCGCGGTAATT  
CCAGCTCCAATAGCGTATATCAAAGTTGTTGCAGTTAAAAAGCTCGTAGTTGGATCTCGGGAGCAG  
CGGTGCGGTCCACCTCGCGGTGG-TCACTGCGTCTGCCCTATTTGCCGGACTCCCCGGTGCCTT





AGATCGTCCAATCCTACTTGGATAACTGTAGTAATTCTAGAGCTAATACATGCAAGCAAGCTCCGA  
CCTTCGGGGAAGAGCGCTTTTATTAGACCAAAACCAAC--GGGCAACCAAACCTTGGTGACTCTGG  
ATAACTTTGAGCAGATCGCACGGCCGCGCCGGCGACGTATCTTTCAAATGTCTGCCCTATCAACTT  
TCGATGGTACGTGCTATGCCTACCATGGTTGTAACGGGTAACGGGGAATCAGGGTTTCGATTCCGGA  
GAGGGAGCATGAGAAACGGCTACCACATCCAAGGAAGGCAGCAGGCGCGCAAATTACCCACTCCTG  
GCACGGGGAGGTAGTGACGAAAAATAACAATACGGGACTCTTTCGAGGCCCCGTAATTGGAATGAG  
TACACTTTAAATCCTTTAACGAGGATCTATTGGAGGGCAAGTCTGGTGCCAGCAGCCGCGGTAATT  
CCAGCTCCAATAGCGTATATCAAAGTTGTTGCAGTTAAAAAGCTCGTAGTTGGATCTCGGGAGCAG  
GCGTGCGGTCCGCCTCGCGGCGGTTCACTGCGTCTGCCCTATCTGCCGACTCCCCCGGTGCCCT  
TCGCTGGGGTGGCCGGGACGTTTACTTTGAAAAATTAGAGTGTTCAAAGCAGGCCCTGAATAATG  
GTGCATGGAATAATGGAATAGGACCTCGGATTTTGTGGTTTCCGGAGCTCGAGGTAATGATTAAG  
AGGGACGGCGGGGGCATTGTATTGCGGCGTTAGAGGTGAAATTTCTGGATCGTCGCAAGACAGAC  
CACAGCGAAAGCATTGCCAAGAATGTTTTCATTAATCAAGAACGAAAGTCAGAGGTTCGAAGACG  
ATCAGATACCGTCGTAGTTCTGACCATAAACGATGCCAGCTAGGGATCCGTCGGCGGTTGAATGACT  
CGGCGAGCACTTTCGGGAAACCAAAGCTTTTGGGTTCCGGGGGAAGTATGGTTGCAAAGCTGAAA  
CTTAAAGGAATTGACGGAAGGGCACCACCAGGAGTGGAGCCTGCGGCTTAATTTGACTCAACACGG  
GAAAACACCCCGCCCCGGACACTGTAAGGATTGACAGATTGAGAGCTCTTTCTTGATTTCGGTGGG  
TGGTGGTGCATGGCCGTTCTTAGTTGGTGGAGCGATTTGTCTGGTTAATTTCCGATAACGAACGAGA  
CTCTAGCCTGCTAAATAGTCCGCCGGTGTGCCGGCGCGACTTCTTAGAGGGACAAGTGGCGTTTAG  
CCACGCGAGATTGAGCAATAACAGGTCTGTGATGCCCTTAGATGTTTCGGGGCCGCACGCGCGCTAC  
ACTGAAAGAATCAACGTGTGTTCCCCTGGCCTGAAAAGGTCCGGCAACCCGCTGAACCTCTTTCGT  
GCTAGGGATTGGGGCTTGCAATTGTTCCCATGAACGAGGAATTTCCAGTAAGCGCGAGTCATCAG  
CTCGCGTTGATTACGTCCCTGCCCTTTGTACACACCGCCCGTCGCTACTACCGATTGGATGGTTTA  
GTGAGACCCTCGGATTGGTCCCGACGGTGGGCAACCGCCGTCGTGGCGCCGAAAAGACGGTCAAAC  
T-----TCACTAAGCGGAGGAAAAGAACTAACAAGGATTCCCCTAG  
TAACGGCGAGTGAAGCGGAAGAGCCCAGCACCGAATCCCCCGCGTCGACCGTGGCGGGAAGTGTG  
GTGTGTGGGAGAGCCTCTGGGCCGGCGGTGGCGTCCGAGTCCTCCTGATCGGGGACATCCATAGCG  
GGTGTGAGGCCTCTACGGCCTCCGCCGCCGGCCCTCTGCGCCTCCTCGGAGTCGGGTTGTTTGTGA  
ATGCAGCCCAAAGTGGGTGGTAAACTCCATCTAAGGCTAAATACTGGCACGAGACCGATAGCGGAC  
AAGTACCGTGAGGGAAAGTT-----  
-----  
-----  
-----  
-----  
-----

>Polydora\_cornuta

CGCCTCTAGATTAGAGGTACATTCTGCCCTATGTAAATGGCCGCGGTAGCCTGACCGTGCTAAGGT  
AGCATAATCATTGCCGTTTAATTGATGGCTAGAATGAATGAATATACGAGAGCTTAACTGTCTCA  
TCTTTAATATAAAATTGACCTTCAAGTGAAGAGACTTGAATTACAAAAAAGACGAAAAGACCCAT  
AGAGCTTTATTTTACCCTTTCTCACCTCAGAAAATTTAGTTGGGGCAACTAGAGAGAACTAAAACC  
TCTCTGAAAA---TTTGATCCGACACGAAAAAAGAAAAAGCTACCTTAGGGATAACAGGCTAATC  
CTCTTTTAGAGACCATATTGACAAGAGGGATTGGCACCTCGATGTTGGCTCAGGGTTACAGTTTGA  
TGCAGCAGTAAGTAGGTTTGTTCACCCTTTAAACCCTTATATGCTTGTCTCAAAGACTAAGCCATG  
CATGTCTAAGTATAAGCTCAACATGGTGAACCCGCAATGGCTCATTAAATCAGTTATGGTTCCCTT  
AGATCTTAACATCCTACTTGGATAACTGTAGTAATTCTAGAGCTAATACATGCACCCGAGCTCCGA  
CCCTCGGGAAAGAGCGCTTTTATTAGACCAAACCAATTGCTCGTGCCAACCTTTGGTGA CTCTGG  
ATAACTTC-AGCTGATCGCATGGCCGCGCCGGCGACGTATCTTTCAAATGTCTGCCCTATCAAGTT  
TCGATGGTTGGTGA CTTGCCAACCATGCTCGTAACGGGTAGCGGGGAATCAGGGTTTCGATTCCGGA  
GAGGGAGCATGAGAAACGGCTACCACATCCAAGGAAGGCAGCAGGCGCGCAAATTACCCACTCCTA  
GCTCGGGGAGGTAGTGACGAAAAATAACAATACGGGACTCTTACGAGGCCCGTAATTGGAATGAG  
TACACTTTAAATCCTTTAACGAGGATCTATTGGAGGGCAAGTCTGGTGCCAGCAGCCGCGGTAATT  
CCAGCTCCAATAGCGTATATTAAGTTGTTGCAGTTAAAAAGCTCGTAGTTGGATCTCGGGAGCGG  
TCCGGCGGTCTCCTCACGGAGGTTCACTGCCYGCCGCTCTCCTCACCGGCTTCCCCGGGTGCTCT  
TCGCTGAGGCGGCCGGAATGTTTACTTTGAAAAATTAGAGTGTTCAAAGCAGGCCCTGAATATTG  
GCGCATGGAATAATGGAATAGGACCTCGGATTTTGTGGTTCGGAAGTCGAGGTAATGATTAGT  
AGGGACGACGGGGCATTTCGTATTGCGCGGTTAGAGGTGAAATTCTTGGATCCGCGCAAGACGAAC  
TACAGCGAAGGCGTCTGCCAAGTGCCTTTCATTAATCAAGAGCGACAGTCAGAGGTTTCAAGACG  
ATCAGATACCGTCGTAGTTCTGACCATAAACGATGCCAGCTAGGGATGGGCGGACGTTGTTGACT  
CCGCCCCGACCTTCCGGGAAACCAAAGCTTTTGGGTTCCGGGGGAAGTATGGTTGCAAAGCTGAAA  
CTTAAAGGAATTGACGGAAGGGCACCACCAGGAGTGGAGCCTGCGGCTTAATTTGACTCAACACGG  
GGAAACTCACCCGGCCCGGACACCGTAAGGATTGACAGATTGAAAGCTCTTTCTTGATTGCGGTGGG  
TGGTGGTGCATGGCCGTTCTTAGTTGGTGGAGCGATTTGTCTGGTTAATTCGATAACGAACGAGA  
CTCTAGCCTGCTAAATAGTTTCGTGCTGTTTCCCGGCGCAACTTCTTAGAGGGACAAGTGGCGTTT  
CCACGCGAGATTGAGCAATAACAGGTCTGTGATGCCCTTAGATGTTCCGGGGCCGCACGCGCGCTAC  
ACTGAAGGACTCAGCTGGT--TCTCCTGGCCTGAAAAGGTTCGGGCAACCCGTTGAACCTCCTTCGT  
GCTAGGGATTGGGGTTTGC AATTATTCCCATGAACGAGGAATTCCCAGTAGGCGCGAGTCATCAG  
CTCGCGTCGATTACGTCCCTGCCCTTTGTACACACCGCCCGTCTACTACCGATCGGATGGTTTA  
GTGAGACCCTTGGACTGGTCCCGTCAGTGGGCAACCGCCGACGCGTTGCCGGGAAGAAGGTCGAAC  
TT-----CACTAAGCGGAGGAAAAGAACTAACCAGGATTCCTTAG  
TAACGGCGAGTGAAACGGGAAGAGCCCAGCACCGAATCCCCTGCCCTG--TGCAGCGGGA ACTGTG  
GTGTTTAGGAGAGCCTGTGGAGCGGCGG-AGCGTCCGAGTCCTTATGAAAGGGGACAGCCAGAGCG

GGTGTCTAGTCCCTCTAGGACGCCCCGCCCCGTTGCTCAGTACCTCCTCGGAGTCCGGGTTGTTTGTGA  
ATGCAGCCCCAAAGTGGGTGGTAACTCCATCTAAGGCTAAATACTGGCACGAGACCGATAGCAAAC  
AAGTACCGTGAGGGAAAGTTGAAAAGAAGTTTGAAGAGAGAGTTCAAGAGTACGTGAAACCGTATA  
GAAGTAAACGGATGGGACCGCAGTGGACCGGCGGGATTTCAGTTTTTTCGGGGCGGCTCGGTGACCT  
TCACGGGGAATGCACTTTCCTCGGGACAGCGCCACGACCGGTTTCTCGGCCGCCAGGCCCGTGGG  
GAAGGTAGCTCGAGTATTATAGCCCCGCGGTGTTCCGGCCGGAGAGACCGAGGAATACCCGCCGGA  
GACCGGTGGACTGGTGGAGACTGCTCGCAGTGTCTCGCCGACCGCGCCGTTTCGGGCCCCCAGGGTC  
AGTGGCGAAGTTGGCTCCCCATCCGACC

>Polydora\_hoplura

CGCCTCTAGATTAGAGGTCCATTCTGCCCTATGTAAATGGCCGCGGTAGCCTGACCGTGCTAAGGT  
AGCATAATCATTTGCCGTTTAAATTGATGGCTGGAATGAATGAATATACGAGAGCTCAACTGTCTCA  
TTTTTAATATAAAATTGACCCTCAAGTGAAGAGACTTGAATCTTAAAAAAGACGAAAAGACCCAT  
AGAGCTTTACCTGAAATATCTCATATAATAAAGGTTTAGTTGGGGCAACTAGAGAGCACTAAAACC  
TCTCTTTAAATTTAAGTGATCCGTTACGATAGTAGAAAAAGCTACCTTAGGGATAACAGGCTAATC  
CTCTTTAAGAGACCATATTGACAAGAGGGATTGGCACCTCGATGTTGGCTCAAGGTTACAGTTTGA  
TGCAGCAGTAAGTAGGTTTGTTCACCCTTTAAATCCTTATATGCTTGTCTCAAAGACTAAGCCATG  
CATGTCTAAGTATAAGCTCTACATGGTGAACCGCGAATGGCTCATTAAATCAGTTATGGTTCCCTT  
AGATCTTAAATCCTACTTGGATAACTGTAGTAATTCTAGAGCTAATACATGCACCTGAGCTCCGA  
CCCTCGGGAAAGAGCGCTTTTATTAGACCAAACCAATGGTCCGTGCCAACCTTTGGTGACTCTGG  
ATAACTTC-AGCTGATCGCATGGCCGAGCCGGCGACGTATCTTCAAATGTCTGCCCTATCAAGTT  
TCGATGGTTGGTGACTTGCCAACCATGCTCGTAACGGGTAGCGGGGAATCAGGGTTTCGATTCCGGA  
GAGGGAGCATGAGAAACGGCTACCACATCCAAGGAAGGCAGCAGGCGCGCAAATTACCCACTCCTA  
GCACGGGGAGGTAGTGACGAAAATAACAATACGGGACTCTTACGAGGCCCCGTAATTGGAATGAG  
TACACTTTAAATCCTTTAACGAGGATCTATTGGAGGGCAAGTCTGGTGCCAGCAGCCGCGTAATT  
CCAGCTCCAATAGCGTATATTAAGTTGTTGCAGTTAAAAAGCTCGTAGTTGGATCTCGGGAGCGG  
TCCGGCGGTCTCCTCACGGAGGTTCACTGCCCGCCGCTCTCCTCACCGGCTTCCCCGGGTGCTCT  
TTGCTGAGGCGGCCGGAATGTTTACTTTGAAAAAATTAGAGTGTTCAAAGCAGGCCCTGAATATTG  
GCGCATGGAATAATGGAATAGGACCTCGGATTTTGTGGTTTTTCGGAAGTCGAGGTAATGATTAGT  
AGGGACGACGGGGCATTTCGTATTGCACGGTTAGAGGTGAAATTCTTGGATCCGTGCAAGACGAAC  
TACAGCGAAGGCGTCTGCCAAGTGCCTTTCATTAATCAAGAGCGACAGTCAGAGGTTCGAAGACG  
ATCAGATACCGTTCGTAGTTCTGACCATAAACGATGCCAGCTAGGGATGGGCGGACGTTGTTGACT  
CCGCCCCGACCTTCCGGGAAACCAAAGCTTTTGGGTTCCGGGGGAAGTATGGTTGCAAAGCTGAAA  
CTTAAAGGAATTGACGGAAGGGCACCACCAGGAGTGGAGCCTGCGGCTTAATTTGACTCAACACGG  
GGAAACTCACCCGGCCCCGACACCGTAAGGATTGACAGATTGAAAGCTCTTTCTTGATTTCGGTGGG  
TGGTGGTGCATGGCCGTTCTTAGTTGGTGGAGCGATTTGTCTGGTTAATTCCGATAACGAACGAGA

CTCTAGCCTGCTAAATAGTTCGCCGGTTAGCCGGCGCAACTTCTTAGAGGGACAAGTGGCGTTTAG  
CCACGCGAGATTGAGCAATAACAGGTCTGTGATGCCCTTAGATGTTTCGGGGCCGCACGCGCGCTAC  
ACTGAAGGACTCAGCTGGT--TCTCCTGGCTTGAAAAAGTCGGGCAACCCGTTGAACCTCCTTCGT  
GCTAGGGATTGGGGTTTGCAATTCTTCCCCATGAACGAGGAATCCCAGTAGGCGCGAGTCATCAG  
CTCGCGTCGATTACGTCCCTGCCCTTTGTACACACCGCCCGTCGCTACTACCGATCGGATGGTTTA  
GTGAGACCCTTGGACTGGTCCCGTCAGTGGGCAACCACCGACGCGTTGCCGGGAAGAAGGTGGAAC  
TTGACTATCTAGAGGAAGTAAAAGTTCACTAAGCGGAGGAAAAGAACTAACCCAGGATTCCCTTAG  
TAACGGCGAGTGAAACGGGAAGAGCCCAGCACCGAATCCCCTGCCTGC---GCAGCGGGAAGTGTG  
GTGTTTAGGAGAGCCTGTGGAGCGGCGG-AGCGTCCGAGTCCTTATGAAAGGGGACAGCCAGAGCG  
GGTGTCTAGTCTCTAGGACGCCCCGTCCCCTGCTCAGTACCTCCTCGGAGTCGGGTTGTTTGTGA  
ATGCAGCCCAAAGTGGGTGGTAAACTCCATCTAAGGCTAAATACTGGCACGAGACCGATAGCAAAC  
AAGTACCGTGAGGGAAAGTTGAAAAGAAGTTTGAAGAGAGAGTTCAAGAGTACGTGAAACCGTATA  
GAAGTAAACGGATGGGACCGCAGTGGACCGGCGGGATTTCAGTTCCTTCGGGGCGGATTGGAGACCT  
TCACCGGGAATGCACTTTCGCCCGGACAGCGCCACGACCGGTTTCCCGGCCGCCAGGCCCGTTGG  
GAAGGTAGCTCGAGTGTATAGCCCTTCGGTGTTCGGGCCGGGAGACCGAGGAATTCCCGCCGGA  
GACCGGCGGACTGGTGGAGACTGCTCGCAGTGTCTCGCCGACCGCGCCGTTTCGGGCCCCCGAGGGTC  
AGTGGCGAAGTTGGCTCCCCATCCGACC

>Polydora\_onagawaensis

CGCCTCCAGATTGAAGGTCCATTCTGCCCTATGTAAATGGCCGCGGTAGCCTGACCGTGCTAAGGT  
AGCATAATCATTGCGCTTTAATTGATGGCTGGAATGAATGAATATAACGAGAGCTAAGCTGTCTCA  
TTTTTAATAAAAAATTGACCTTTAAGTGAAGAGACTTAAATCTTAAAAAAGACGAAAAGACCCAT  
AGAGCTTTATCTAAACTAATATTTATAGTAAAGATTTAGTTGGGGCAACTAGAGAGAACTAAAACC  
TCTCTTTCTTTAAAAATGATCCGTTACGATGGAAGAAAAAGCTACCTTAGGGATAACAGGCTAATC  
CTCTTTAAGAGACCATATTGACAAGAGGGATTGGCACCTCGATGTTGGCTCAAGGTTACAGTTTGA  
TGCAGCAGTAAGTAGGTTTGTTCACCCTTTAAATCCTTATATGCTTGTCTCAAAGACTAAGCCATG  
CATGTCTAAGTATAAGCTCTACATGGTGAACCGCGAATGGCTCATTAAATCAGTTATGGTTCCTT  
AGATCTTAAATCCTACTTGGATAACTGTAGTAATTCTAGAGCTAATACATGCACCTGAGCTCCGA  
CCCTCGGGAAAGAGCGCTTTTATTAGACCAAACCAATGGTTCGTGCCAACCTTTGGTACTCTGG  
ATAACTTC-AGCTGATCGCATGGCCGTGCCGGCGACGTATCTTTCAAATGTCTGCCCTATCAAGTT  
TCGATGGTTGGTACTTGCCAACCATGCTCGTAACGGGTAGCGGGGAATCAGGGTTCGATTCCGGA  
GAGGGAGCATGAGAAACGGCTACCACATCCAAGGAAGGCAGCAGGCGCGAAATTACCCACTCCTA  
GTTTCGGGGAGGTAGTGACGAAAATAACAATACGGGACTCTTTCGAGGCCCGTAATTGGAATGAG  
TACACTTTAAATCCTTTAACGAGGATCTATTGGAGGGCAAGTCTGGTGCCAGCAGCCGCGTAATT  
CCAGCTCCAATAGCGTATATTAAGTTGTTGCAGTTAAAAAGCTCGTAGTTGGATCTCGGGAGCGG  
TCCGGCGGTCCTCCTCGCGGAGGTTCACTGCCTGCCGCTCTCCTCACCGGCTTCTCCGGGTGCTCT





>Prionospio\_dubia

????????????????????????????????????????????????????????????????????????????????????  
????????????????????????????????????????????????????????????????????????????????????  
????????????????????????????????????????????????????????????????????????????????????  
????????????????????????????????????????????????????????????????????????????????????  
????????????????????????????????????????????????????????????????????????????????????  
????????????????????????????????????????????????????????????????????????????????????  
????????????????????????????????????????????????????????????????????????????????????  
????????????????????????????????????????????????????????????????????????????????????  
CATGTCTAAGTACAAGCTTAACACGGTGAAACCGCAATGGCTCATTAATCAGTTATGGTTCCTT  
AGATCGTACAATCCTACTTGGATAACTGTAGTAATTCTAGAGCTAATACATGCAAGCAAGCTCCGA  
CCTTCGGGAAAGAGCGCTTTTATTAGACCAAACCAAT--GGGCAACCTCTCGTTGGTGACTCTGG  
ATAACTTCGAGCTGATCGCACGGCCGAGCCGGCGACGTATCTTCAAATGTCTGCCCTATCAACTT  
TCGTCGGTAGGCGCCATGCCTACGGAGGTAGTAACGGGTAACGGGGAATCAGGGTTCGATTCCGGA  
GAGGGAGCATGAGAAACGGCTACCACATCCAAGGAAGGCAGCAGGCGCGCAAATTACCCACTCCTG  
GCACGGGGAGGTAGTGACGAAAAATAACAATACGGGACTCTTTCGAGGCCCGTAATTGGAATGAG  
TACTTTTAAATCCTTTAACGAGGATCTATTGGAGGGCAAGTCTGGTGCCAGCAGCCGCGGTAATT  
CCAGCTCCAATAGCGTATATTAAAGTTGTTGCAGTTAAAAAGCTCGTAGTTGGATCTCGGGAGCAG  
GCCGGCGGTCCGCCTCGCGGCGG-CCACTGCCGGCCCTGCCCCCTGCCGGCTTCCCCCGGTGCTCT  
TCGCTGGGGTGGCTGGTACGTTTACTTTGAAAAAATTAGAGTGTTCAAAGCAGGCCCTGAATAATG  
GTGCATGGAATAATGGAATAGGACCTCGGATTTTGTGGTTCGGAAGTGGAGGTAATGATTAAG  
AGGGACAGCGGGGGCATTTCGTATTGCGCCGTTAGAGGTGAAATTCTTGGATCGGCGCAAGACGAAC  
TACTGCGAAAGCATTTCGCAAGAATGTTTTTCATTAATCAAGAACGAAAGTCAGAGGTTTCAAGACG  
ATCAGATACCGTTCGTAGTTCTGACCATAAACGATGCCAGCTAGGGATTCCGCCGGAGTTGTATGACT  
CTGCGAGCACCTTCCGGGAAACCAAAGCTTTTGGGTTCCGGGGGAAGTATGGTTGCAAAGCTGAAA  
CTTAAAGGAATTGACGGAAGGGCACCACCAGGAGTGGAGCCTGCGGCTTAATTTGACTCAACACGG  
GGAAACTCACCCGGCCCGGACACTGTAAGGATTGACAGATTGAGAGCTCTTTCTTGATTTCGGTGGG  
TGGTGGTGCATGGCCGTTCTTAGTTGGTGGAGCGATTTGTCTGGTTAATTCGATAACGAACGAGA  
CTCTAGCCTATTAAATAGTTTCGCGGGTTTCGCCCAGCAACTTCTTAGAGGGACAAGTGGCGTTTAG  
CCACGCGAGATTGAGCAATAACAGGTCTGTGATGCCCTTAGATGTTTCGGGGCCGCACGCGCGCTAC  
ACTGAAGGAATCAGCGTGTGTTCTCCCGGCCGGAATGGTCCGGTAACCCGTTGAACCTCCTTCGT  
GCTAGGGATTGGGGCTTGAATTCCTCCCATGAACGAGGAATTCAGTAAGCGCGAGTCATCAG  
CTCGCGTTGATTACGTCCCTGCCCTTTGTACACACCGCCCGTTCGCTACTACCGATTGGATGGTTTA  
GTGAGACCCTCGGATTGGTCCCGGCGGCGGGCAACCGCCCGCGGCGCCGAGAAGACGGTCAAAC  
TTGACTATCTAGAGGAAGTAAAAGTTCACTAAGCGGAGGAAAAGAACTAACCCAGGATTCCTTAG  
TAACGGCGAGTGAAGCGGAAGAGCCCAGCACCGAATCCCCTGCGT--AACGYAGCGGGAAGTGTG  
GTGTTTGGGAGAGCCTGTGGGGCGCCGGCGGCGTCCGAGTCTCCTGATCGGGTCAACCAGAGCG



GGTGT CAGGCTCTACGGCTTCTGCCAGCGTCCCTCTGAGCCTCCTAGGAGTCGGGTTGTTTGTGA  
ATGCAGCCCAAAGTGGGTGGTAAACTCCATCTAAGGCTAAATACTGGCACGAGTCCGATAGCGGAC  
AAGTACCGTGAGGGAAAGTTGAAAAGA ACTTTGAAGAGAGAGTTCAAGAGTACGTGAAACCGTATA  
GAGGCAAACGGATGGGGCCGAGTCGACCCGCGGAATTCAGCTTTGCCGGTTTGGCTCGGAGCCTC  
TTACGGCGAGTGCAC TTTCCGCGGGGAGAGCGCCACGACCGGTTCTCGGGCCGTGAAGCCCTCCGG  
GAAGGTAGCTTGAGTGTATAGCCCCGGGAGGTGTTCCGCGGGGGACCGAGGAACCCGCGCCGGG  
CAGCAATGGACTGGCAGGGACTGCTCGCAGTGCTTGCCGACCGCGGTCATCGCATAACCGAGGGTC  
AGTGGCGAAGTCGGTTTCCCATCCGACC

>Prionospio\_sp\_C\_sensu\_Guggolz\_et\_al\_2020

-----  
-GCATAATCATTTCCTTTTAATTAGAGGCTTGTATGAACGGACACACGTAAGCTAAGCTGTCTCA  
TTAATAATAAAAAATTAACCTCTAGGTGAAGAGACCTAGATCATATAAAAAGACGAAAAGACCCAT  
GGAGCTTTACTTACGTTATAATTTTCTTATAAAGTTTAGTTGGGGCGACTAAGGAGCAAAAAAAC  
CTCCTCTTAATAAAATAGATCCGAAGCGA-TAAAAATCAGCTACCCTAGGGATAACAGGCTAATC  
CTCCTTGAGAGCCCAAATTGACAGGAGGGGTTGGCACCTCGATGTTGGCTTAAGGTTCTCCAAAG  
TGCAGCAGCAAGTAGGTTTGTTCACCCTTTAAAACCTT-----TG  
CATGTCT-AGTACAAGCTTAACATGGTGAACCGCGAATGGCTCATTAAATCAGTTATGGTTCCCTT  
AGATCGTACAATCCTACTTGGATAACTGTAGTAATTCTAGAGCTAATACATGCAAGCAAGCTCCGA  
CCTTCGGGAAAGAGCGCTTTTATTAGACCAAAACCAAT--GGGCAACCTCT-GTTGGTGA CTCTGG  
ATAACTTTGAGCTGATCGCATGGCCGAGCCGGCGACGTATCTTTCAAATGTCTGCCCTATCAACTT  
TCGACGGTACGTGATATGCC TACCCTGTTGTAACGGGTAACGGGGAATCAGGGTTTCGATTCCGGA  
GAGGGAGCATGAGAAACGGCTACCACATCCAAGGAAGGCAGCAGGCGCGCAAATTACCCACTCCTG  
GCACGGGGAGGTAGTGACGAAAATAACAATACGAGACTCTTTCGAGGCCTCGTAATTGGAATGAG  
TACACTTTAAATCCTTTAACGAGGATCTATTGGAGGGCAAGTCTGGTGCCAGCAGCCGCGGTAATT  
CCAGCTCCAATAGCGTATATTAAGTTGTTGCAGTTAAAAAGCTCGTAGTTGGATCTCGGGAGCAG  
GCCGGCGGTCCGCCTCGCGGCGG-TTACTGCCTGTCTGCCCCCTGCCGGTTTCCCCCGGTGCTCT  
TCACTGGGGTGGCCGGAACGTTTACTTTGAAAAAATTAGAGTGTTCAAAGCAGGCCCTGAATAATG  
GTGCATGGAATAATGGAATAGGACCTCGGATTTTGTGGTTTTTCGGAACCTTGAGGTAATGATTAAG  
AGGGACAGCGGGGGCATTTCGTATTACGCTGTTAGAGGTGAAATTCTTGGATCGGCGTAAGACGAAC  
TACTGCGAAAGCATTGCGCAAGAATGTTTTCATTAATCAAGAACGAAAGTCAGAGGTTCGAAGACG  
ATCAGATACCGTCGTAGTTCTGACCATAAACGATGCCAGCTAGGGATTTCGCCGGAGTTGTATGACT  
CTGCGAGCACCTTCCGGGAAACCAAAGCTTTTGGGTTCCGGGGGAAGTATGGTTGCAAAGCTGAAA  
CTTAAAGGAATTGACGGAAGGGCACCACCAGGAGTGGAGCCTGCGGCTTAATTTGACTCAACACGG  
GGAAACTCACCCGGCCCGGACACTGTAAGGATTGACAGATTGAGAGCTCTTTCTTGATTCGGTGGG  
TGGTGGTGCATGGCCGTTCTTAGTTGGTGGAGCGATTTGTCTGGTTAATTCGATAACGAACGAGA





AGATCGTACAATCCTACTTGGATAACTGTAGTAATTCTAGAGCTAATACATGCAAGCAAGCTCCGA  
CCTTCGGGAAAGAGCGCTTTTATTAGACCAAACCAAT--GGGCAACCTCACGTTGGTGACTCTGG  
ATAACTTTGAGCTGATCGCATGGCCGAGCCGGCGACGTATCTTTCAAATGTCTGCCCTATCAACTT  
TCGACTGGACGTGATATGCCTCCAGTGGTTGTAACGGGTAACGGGGAATCAGGGTTCGATTCCGGA  
GAGGGAGCATGAGAAACGGCTACCACATCCAAGGAAGGCAGCAGGCGCGCAAATTACCCACTCCTG  
GCACGGGGAGGTAGTGACGAAAAATAACAATACGGGACTCTTTCGAGGCCCCGTAATTGGAATGAG  
TACACTTTAAATCCTTTAACGAGGATCTATTGGAGGGCAAGTCTGGTGCCAGCAGCCGCGGTAATT  
CCAGCTCCAATAGCGTATATTAAGTTGTTGCAGTTAAAAAGCTCGTAGTTGGATCTCGGGAGCAG  
GCCGGCGGTCCGCCTCGCGGCGG-TTACTGCCTGTCTGCCCCCTGCCAGTTTCCCCCGGTGCCCT  
TCGCTGGGGTGGCTGGAACGTTTACTTTGAAAAATTAGAGTGTTCAAAGCAGGCCCTGAATAATG  
GTGCATGGAATAATGGAATAGGACCTCGGATTTTGTGGTTTTTCGGAACCTTGAGGTAATGATTAAG  
AGGGACAGCGGGGGCATTTCGTATTACGGTGTAGAGGTGAAATTCCTGGATCGCCGTAAGACGAA  
TACTGCGAAAGCATTGCCAAGCATGTTTTCATTAATCAAGAACGAAAGTCAGAGGTTCGAAGACG  
ATCAGATACCGTCGTAGTCTGACCATAAACGATGCCAGCTAGGGATTCCGCCGGAGTTGTATGACT  
CGGCGAGCACCTTCCGGGAAACCAAAGCTTTTGGGTTCCGGGGGAAGTATGGTTGCAAAGCTGAAA  
CTTAAAGGAATTGACGGAAGGGCACCACCAGGAGTGGAGCCTGCGGCTTAATTTGACTCAACACGG  
GGAAACTCACCCGGCCCGGACACTGTAAGGATTGACAGATTGAGAGCTCTTTCTTGATTCCGGTGGG  
TGGTGGTGCATGGCCGTTCTTAGTTGGTGGAGCGATTTGTCTGGTTAATTCCGATAACGAACGAGA  
CTCTAGCCTATTAATAGTTTCGCCGATTTCGTGCGCGCAACTTCTTAGAGGGACAAGTGGCGTTTAG  
CCACGCGAGATTGAGCAATAACAGGTCTGTGATGCCCTTAGATGTTCCGGGGCCGCACGCGCGCTAC  
ACTGAAGGAATCAGCGTGTGTTCTCCTGGCCCGAAAGGGTCCGGTAACCCAATGAACCTCCTTCGT  
GCTAGGGATTGGGGTTTGAATTATCCCCATGAACGAGGAATTCAGTAAGCGCGAGTCATCAG  
CTCGCGTTGATTACGTCCCTGCCCTTTGTACACACCGCCCGTCGCTACTACCGATTGGATGGTTTA  
GTGAGACCCTCGGATTGGTCCCGACGGTGGGCAACCGCCGTCGTG-CGCCGAAAAGACGGTCAAAC  
TTGACTATCTAGAGGNAGTAAAAGT-----  
-----  
-----CGGCGGCGTCCGAGTCCTCCTGATCGGGGTTACCCATAGCG  
GGTGTACAGGCTCTACGGCTTCCGCCGTGTCCTCTGAGCCTCCTAGGAGTCGGGTTGTTTGGGA  
ATGCAGCCCAAAGTGGGTGGTAAACTCCATCTAAGGCTAAATACTGGCATGAGTCCGATAGCGGAC  
AAGTACCGTGAGGGAAAGTTGAAAAGAAGTTTGAAGAGAGAGTTCAAGAGTACGTGAAACCGTATA  
GAGGCAAACGGATGGGGCCGAGTCGACCCGCGGAATTCATCTTGCAGCGGGTGCAGTTCGGAGCC  
TCTCGGCGAGTGCATTTCCGCGGGGAGAGCGCCACGACCGGTTCTCTGGCAGTCAAGCCCCGTCGG  
GAAGGTAGCTCGAGTGTATAGCCCAGCGAGGTGTTGGCCTGGGGGACCGAGGAACACCCGCCGGG  
ACGCGGCGGACCTGCAAGGACTGCTCGCAGTGTGCTAACCGCGTCGCGGGGTTACCCAGGGTC  
AGTGCGAAGTCGGTTTCCCATCCGACC

>Pseudopolydora\_paucibranchiata

CGCCTCTAGATTGGAGGTCCATTCTGCCCCATGTAAATGGCCGCGGTAACCTGACCGTGCTAAGGT  
AGCATAATCACTTGCCGTTTAATTGATGGCTAGAATGAATGAATATACGAAAGCTCCGCTGTCTCG  
CCCTAATTAATAATTGGCCTTCAAGTGAAGAGACTTGAATTAACAAAAAGACGAAAAGACCCAT  
AGAGCTTAGCTTAACACACCCTACTGAAAGAAAGCTTAGTTGGGGCAACTAGAGAAAACCTAAAACC  
TCTCTT-----AGATCCAAACTGAAAATAGAAAAGCTACCTTAGGGATAACAGGCTAATC  
TTGTTTGAGAGACCATATTGACAACAAGGCTTGGCACCTCGATGTTGGCTCAGGATTTCACTTTGA  
TGCAGCAGTATGAAGTTTGTCTCCCTTTAATATCCTATATGCTTGTCTCAAAGACTAAGCCATG  
CATGTCTAAGTATAAGCTCTACATGGTGAACCCGCAATGGCTCATTAAATCAGTTATGGTTCCCT  
AGATCGCACTATCCTACTTGGATAACTGTAGTAATTCTAGAGCTAATACATGCATCGAAGCTCCGA  
CCTCGGGGAAAGAGCGCTTTTATTAGACCAAACCAATTCGGCCGTCCAACCTTTGGTGAATCTGG  
ATAACTTG-AGCTGATCGCACGGCCGAGCCGGCGACGTATCTTTCAAATGTCTGCCCTATCAAGTC  
TCGACGGTTGGTGAAGTTGCCAACCCTGCTTATTACGGGTAGCGGGGAATCAGGGTTCGATTCCGGA  
GAGGGAGCATGAGAAACGGCTACCACATCCAAGGAAGGCAGCAGGCGCGCAAATTACCCACTCCTA  
GCTCGGGGAGGTAGTGACGAAAAATAACAATACGGGACTCTTACGAGGCCCCGTAATTGGAATGAG  
TACACTTTAAATCCTTTAACGAGGATCTATTGGAGGGCAAGTCTGGTGCCAGCAGCCGCGGTAATT  
CCAGCTCCAATAGCGTATACTAAAGTTGTTGCAGTTAAAAAGCTCGTAGTTGGATCTCGAGACCGG  
CCCCTCGGTCCTCCTCGCGGAGGTTTACTGGCCGCCGGCCTCCTCGCCGGCTTCTGCAGGTGCTCT  
TTACTGCGGCGCCGGAGCGTTTACTTTGAAAAATTAGAGTGTTCAAAGCAGGCCCTGAATACTG  
GTGCATGGAATAATGGAATAGGACCTCGGATTTTGTGGTTTTTCGGAAGTCGAGGTAATGATTAGT  
AGGGACGGCGGGGGCATTTCGTATTGCGCGGTTAGAGGTGAAATTCTTGGATCCGTGCAAGACGAAC  
TACAGCGAAGGCGTTTGCCAAGTGCCTTTCATTAATCAAGAGCGACAGTCAGAGGTTTCAAGACG  
ATCAGATAACCGTCGTAGTTCTGACCATAAACTCTGCCAGCTAGGGATGGGCGGTCGTTGAACGACT  
CCGCCCCGACCTTCCGGGAAACCAAAGCTTTTGGGTTCCGGGGGAAGTATGGTTGCAAAGCTGAAA  
CTTAAAGGAATTGACGGAAGGGCACCACCAGGAGTGGAGCCTGCGGCTTAATTTGACTCAACACGG  
GGAAACTCACCCGGCCCGGACACCGTAAGGATTGACAGATTGAAAGCTCTTTCTTGATTGCGGTGGG  
TGGTGGTGCATGGCCGTTCTTAGTTCGTGGAGCGATTTGTCTGGTTAATTCGATAACGAACGAGA  
CTCTAGCCTGCTAAATAGTTCGCCGGTATGCCGGTGCAGCTTCTTAGAGGGACAAGTGGCGTTTAG  
CCACGCGAGATTGAGCAATAACAGGTCTGTGATGCCCTTAGATGTTCCGGGGCCGCACGCGCGCTAC  
ACTGAAGGAATCAGCTGGTGTCTCCTGGTCTGGAAAGATCGGGCAACCCGTTGAACCTCCTTCGT  
GCTAGGGATTGGGGCTTGCAATTGTTCCCATGAACGAGGAATTCCAGTAGGCGCGAGTCATCAG  
CTCGCGTCGATTACGTCCCTGCCCTTTGTACACACCGCCCGTGCCTACTACCGATCGGATGGTTTA  
GTGAGACCCTTGGACTGGTCCCGTTGGTGGGCAACCACTAACGTGTTGCCGGGAAGAAGGTGCAAC  
TTGACTATCTAGAGGAAGTAAAGTTCACTAAGCGGAGGAAAAGAACTAACAAGGATTCCTTAG  
TAACGGCGAGTGAACCGGAAGAGCCCAGCACCGAATCCCCTGCATCGACTGTAGCGGGAACGTG  
GTGTTTAGGAGAGCCTGTGGAGCGGTGG-AGCGTCCGAGTCCTCACGAACGGGGTTTGCCAGAGCG

GGTGTCTAGTCCCTCTAGGACGCACCATCCCCTTGCTCAGTACCTCCTAGGAGTCGGGTTGTTTGAGA  
TTGCAGCCCCAAAGCGGGTGGTAAACTCCATCTAAGGCTAAATACTGGCACGAGACCGATAGCAAAC  
AAGTACCGTGAGGGAAAGTTGAAAAGAAGTTTGAAGAGAGAGTTCAAGAGTACGTGAAACCGTATA  
GAAGCAAAGTATGGAACCGCAGTGGACTGGCGGGATTAGCTTTTCT-GGGCGGTGTGTGACCC  
TAACAGGGAGTGCACCTTCCGCCAGGACAGCGCCACGTCCGGTTCTTCTGCCGCCAGGCCCGGGAG  
GAAGGTAGCTTAAGTATTATAGCCTCTCGGTGTTCCGGCCGGAGGGACCGTGAATACCCGCCGGA  
GACCGGTCGACTGGTGGAGACTGCACGCAGTGTCTGCCGACTGCGCTGTTCCGGCCCCCAGGGAC  
TGTGGCGAAGTTGGCTCTCCATCAGACC

>Pseudopolydora\_tsubaki

CGCCTCTAGATTAGAGGTCCATTCTGCCCTATGTAAATGGCCGCGGTAACCTGACCGTGCTAAGGT  
AGCATAATCATTGTCATTTAATTGGTGGCTAGTATGAACGAATATACGAGATCAGAAGTGTCTCT  
TGTTTACTAAAAATTGACCTTCAAGTGAAGAGACTTGACTTAAATAAAAAGACGAAAAGACCCAT  
AGAGCTTTATTTTAACTACTCTCTTAAGTAAAATTTAGTTGGGGCAACTAGAGGGAACTAAAAA  
CCTCTAAAATAAAAATAAGATCCACGCTGATAAAAGAAAAGCTACCTTAGGGATAACAGGCTAATC  
CTGTTTTAGAGACCATATTGACAACAGGGCTTGGCACCTCGATGTTGGCTCAAGGCAACCCCCGA  
TGCAGCAGTAGGTAGGTTTGTTCACCCTTTAATTCCTT-----  
-----TAAGTATAAGCTCAACATGGTGAACCGCGAATGGCTCATTAAATCAGTTATGGTTCCTT  
AGATCGTATCATCCTACTTGGATAACTGTAGTAATTTAGAGCTAATACATGCACCGAAGCTCCGA  
CCCTGGGGAAAGAGCGCTTTTATTAGACCAAACCAATGGCGGCGGCCACCCTTTGGTGAATCTGG  
ATAACTTC-AGCCGATCGCACGGCCGTGCCGGCGACGTATCTTTCAAATGTCTGCCCTATCAAGTT  
TCGACGGTTCGTGACATGCCAACCCTGCTTATAACGGGTAGCGGGGAATCAGGGTTCGATTCCGGA  
GAGGGAGCATGAGAAACGGCTACCACATCCAAGGAAGGCAGCAGGCGCGCAAATTACCCACTCCTA  
GCTCGGGGAGGTAGTGACGAAAATAACAATACGGGACTTTACGAGGCCCCGTAATTGGAATGAG  
TACACTTTAAATCCTTTAACGAGGATCTATTGGAGGGCAAGTCTGGTGCCAGCAGCCGCGTAATT  
CCAGCTCCAATAGCGTATATTAAGTTGTTGCAGTTAAAAAGCTCGTAGTTGGATCTCGGGAGCCG  
TCCGGCGGTCTCCTCGCGGAGGTTCACTGCCC GCGGCTCTCCTCGCCGGCTTCCCCGGGTGCTCT  
TCACTGAGGCGGCCGGAGCGTTTACTTTGAAAAAATTAGAGTGTTCAAAGCAGGCCCTGAATATTG  
GCGCATGGAATAATGGAATAGGACCTCGGATTTTGTGGTTTTTCGGAAGTCGAGGTAATGATTAGT  
AGGGACGACGGGGCATTTCGTATTGCGCGGTTAGAGGTGAAATTTCTGGATCCGCGCAAGACGAAC  
TACAGCGAAGGCGTTTGCCAAGTGCCTTTCATTAATCAAGAGCGACAGTCAGAGGTTCGAAGACG  
ATCAGATACCGTCGTAGTTCTGACCATAAACGATGCCAGCCAGGGACGGGCGGACGTTGAACGACT  
CCGCCCCGACCTTCCGGGAAACCAAAGCTTTTGGGTTCCGGGGGAAGTATGGTTGCAAAGCTGAAA  
CTTAAAGGAATTGACGGAAGGGCACCACCAGGAGTGGAGCCTGCGGCTTAATTTGACTCAACACGG  
GAAACTCACCCGGCCCCGACACCGTAAGGATTGACAGATTGAAAGCTCTTCTCGATTCCGGTGGG  
TGGTGGTGCATGGCCGTTCTTAGTTGGTGGAGCGATTTGTCTGGTTAATTCGATAACGAACGAGA

CTCTAGCCTGCTAAATAGTTTCGCCTCTGTGCTCGGGATACTTCTTAGAGGGACAAGTGGCTTTT  
CCACGCGAGATTGAGCAATAACAGGTCTGTGATGCCCTTAGATGTTTCGGGGCCGCACGCGCTAC  
ACTGAAGGAATCAGCTGGTC-CTTCCTGGCCTGGAAAGGTTCGGGCAACCCGTTGAACCTCCTTCGT  
GCTAGGGATTGGGGCTTGAATTATTCATGAACGAGGAATTCCCAGTAGGCGGAGTCATCAG  
CTCGCGTCGATTACGTCCCTGCCCTTTGTACACACCGCCCGTCGCTACTACCGATCGGATGGTTTA  
GTGAGACCCTCGGACTGGTCCCGTTGGGGGGCAACTCCTTTTCGCGTTGCCGGGAAGAAGG-----  
-----TCACTAAGCGGAGGAAAAGAACTAACCCAGGATTCCCTTAG  
TAACGGCGAGTGAACCGGAAGAGCCCAGCACCGAATCCCCTGCATCGACTGTAGAGGAACTGTG  
GTGTTTGGGAGAGACCGTGGAGCGGCGG-GGCTTCCGAGTCCTCATGAACGGGGTTCCGCAGAGCG  
GGTGTCTAGTCTATAGGAGGCACCGTCCCCTGCTCGGTCCTTAGGAGTTCGGGTTGTTTGA  
TTGCAGCCCTAAGCGGGTGGTAACTCCATCTAAGGCTAAATACTGGCACGAGACCGATAGCAAAC  
AAGTACCGTGAAGGAAAGTTGAAAAGAAGTTTGAAGAGAGAGTTCAAGAGTACGTGAACCCGTATA  
GAAGTAAACCGATGGAACCGCAGTGGACGGGCGGGATTAGCTTTCTCTCGGC-GTCCGGGGACCG  
TTAAAAGGAGTGCACTTTCCGCCCCAACAGCGCCACGACCGGTTCTCCGGCCGCCAGGCCCGAGAG  
GAAGGTAACTCGAGTGTATAGCCTCTCGAAG--CCGGCCGGGAGGACCGAGGAGTATCCGCCGGC  
TTCCAGTAGACTGACGTGGACTGCTCGCAGTGTCTGCTGACTGCGCTTTTTCGGGTCCAACAGGGTC  
TGTGGCGAAGTTGGCCATCCATCGGACC

>Pygospio\_elegans

CGCCTCTAGATTAGAGGTCCATTCTGCCCTATGTAAATGGCCGCGGTAACCTGACCGTGCTAAGGT  
AGCATAATCATTGGCCATTTAATTGGTGGCTAGAATAAATGAATACACGAAAGTTAAGCTGTCTCA  
TTTTTAATAAAAAATTGACCCCCCTGGTGAAGAGACCAGTATTAACAAAAAGACGAAAAGACCCCTAT  
AGAGCTTTATCCTATATAATTATCTTAAAAAGGATTTAGTTGGGGCAACTAGAGAGAACTAAATCC  
TCTCTTACAAAAACACTGATCCGAATCGACAGAAGAGAAAGCTACCTTAGGGATAACAGGCCAATC  
CTTTTTGAGAGACCATATTGACAAAAGGGATTAGCACCTCGATGTTGGCTCAAGGTTACAGCTTGA  
TGCAGCAGTAAGCGGGTTTGTTCACCCTTTAACCTT-----CTAGCCATG  
CATGTCTAAGTATAAGCTCTATATGGTGAACCGCGAATGGCTCATTAAATCAGTTATGGTTTATT  
AGATCTTAAAATCCTACTTGGATAACTGTAGTAATTCTAGAGCTAATACATGCAAAAAAGCTCCGA  
CCTCGCGGAAAGAGCGCTTTTATTAGACAAAACCAAAGGGGCCGCTAACCTCTGGTACTCTGG  
ATAACTTC-AGCTGATCGCACGTCTAAGACGGCGACGTATCTTTCAAATGTCTGCCCTATCAAGTT  
TCGATGGTTGTTGCTTTGCCAACCATGCTTATAACGGGTAGCGGGGAATCAGGGTTTCGATTCCGGA  
GAGGGAGCATGAGAAACGGCTACCACATCCAAGGAAGGCAGCAGGCGCGCAAATTACCCACTCCCA  
GCTCGGGGAGGTAGTGACGAAAATAACAATACGGGACTCTTACGAGGCCCCGTAATTGGAATGAG  
TACAATTTAAATCCTTTAACGAGGATCTATTGGAGGGCAAGTCTGGTGCCAGCAGCCGCGGTAATT  
CCAGCTCCAATAGCGTATATTAAGTTGTTGCAGTTAAAAAGCTCGTAGTTGGATCTCGGGGACGG  
TCCGGCGGTGCTCCTCGCGGAGTTATACTGCCCATCGTTCTCCTCGCCGGCTGTCTAGGGTGGACT

TCGTTGAGTTGGCCGGGACGTTTACTTTGAAAAAATTAGAGTGTTCAAAGCAGGCCCTGAATACTG  
GTGCATGGAATAATGGAATAGGATCTCGGATTTTGTGGTTTTTGGAAAGTCGAGGTAATGATAAAT  
AGGGACGACGGGGCATTTCGTATTGCACGGTTAGAGGTGAAATTCTTGGATCCGTGCAAGACGAAC  
TACAGCGAAGGCGTCTGCCAAGTGCCTTTCATTAATCAAGAGCGACAGTCAGAGGTTTGAAGACG  
ATCAGATAACCGTCGTAGTTCTGACCATAAACGATGCCAGCTAGGGATGGGCGGACGTTGCACGACT  
CCGCCCCGACCTTCCGGGAAACCAAAGCTTTTAGGTTCCGGGGGAAGTATGGTTGCAAAGCTGAAA  
CTTAAAGGAATTGACGGAAGGGCACCACCAGGAGTGGAGCCTGCGGCTTAATTTGACTCAACACGG  
GGAAACTCACCCGGCCCGGACACCGTTAGGATTGACAGATTGAAAGCTCTTTCTTGATTGCGGTGGG  
TGGTGGTGCATGGCCGTTCTTAGTTGGTGGAGCGATTTGTCTGGTTAATTCGATAACGAACGAGA  
CTCTAGCCTGCTAAATAGTTACCCGTTTCCCGGTGCAACTTCTTAGAGGGACAAGTGGCGTTCAG  
CCACGCGAGATTGAGCAATAACAGGTCTGTGATGCCCTTAGATGTCCGGGGCCGCACGCGCGCTAC  
ACTGAAGGAATCAACTGGT--CCTCCTGTCCTGAAAAGGATGGGTAACCCGATGAACCTCCTTCGT  
GCTAGGGATTGGGGTTTGTAAATCTTCCCCATGAACGAGGAATTCCCAGTAAGCGCGAGTCATCAA  
CTCGCGTTGATTACGTCCCTGCCCTTGTACACACCGCCCGTGCCTACTACCGATCGGATGGTTTA  
GTGAGACCCTCGGACCGGTCCCGTCAGCGGTTCCCGCAGACGCGCTGCTGGGAAGAAGTTCGAAC  
TTG-----TCACTAAGCGGAGGAAAAGAACTAACCAGCA-TCCCTCAG  
TAACGGCGAGTGAACCGGGAGGAGCCCAGCACCGAATCCCCTGCCGCTA-GGCAGCGGGAAGTGTG  
GTGTTAAGGAGAGCCTGTGGAGCAGCGG-TGCGTCCGAGTCCCCATGAACGGGGTTTCCAGAGCG  
GGTGTAAAGTCTCTAAGGCGCCCCGCACTGTTGCTCAGTACCTCCTAGGAGTCGGATTGTTTGAGA  
ATGCAGTCCAAAGCGGTGGTAAACTCCATCTAAGGCTAAATACTGGCACGAGTCCGATAGCGAAC  
AAGTACCATGAGGGAAAGTT-----  
-----  
-----  
-----  
-----  
-----  
-----

>Pygospio\_sp\_VVP\_2014

-----  
-GCATAATCATTGCCATTTAATTGGTGGCTAGAAATAAATGAATACACGAAAATTAAGCTGTCTCA  
CTTTTAATAAAAATTGATCTCCTGGTGAAGAAACCAGGATTCTACAAGAAGACGAAAAGACCCAT  
AGAGCTTTACCCTATATAATATTCATAAAAAGGGTTTAGTTGGGGCAACTAGAGAGAACTAAATCC  
TCTCTTTTAAGAAAAAGATCCGAATCGATAGAAGAAAAAGCTACCTTAGGGATAACAGGCCAATC  
CTTTTGGAGAGACCATATTGACAAAAGGGA-----  
-----TAAGCCTG  
CATGTCTAAGTATAAGCTCTATATGGTGAACCGCGAATGGCTCATTAAATACAATTATGGTTTTATT



AGATCTTAAAATCCTACTTGGATAACTGTAGTAATTCTAGAGCTAATACATGCAAAATAGCTCCGA  
CTTCACGGAAAGAGCGCTTTTATTAGACCAAACCAAAGGGGCGTCTAACCTCTGGTACTCTGG  
ATAACTTC-AGCTGATCGCACGTCTAAGACGGCGACGTATCTTTCAAATGTCTGCCCTATCAAGTT  
TCGATGGTTGTTGCTATGCCAACCATGCTTATAACGGGTAGCGGGGAATCAGGGTTCGATTCCGGA  
GAGGGAGCATGAGAAACGGCTACCACATCCAAGGAAGGCAGCAGGCGCGCAAATTACCCACTCCCA  
GCTCGGGGAGGTAGTGACGAAAAATAACAATACGGGACTCTTACGAGGCCCCGTAATTGGAATGAG  
TACAATTTAAATCCTTTAACGAGGATCTATTGGAGGGCAAGTCTGGTGCCAGCAGCCGCGGTAATT  
CCAGCTCCAATAGCGTATATTAAGTTGTTGCAGTTAAAAAGCTCGTAGTTGGATCTCGGGAGCGG  
TCCGGTGGTCCCTCGCGGAGGTTTACTGCC-ATCGTTCTCCTCGCCGGCTGTCTAGGGTGAGCT  
TCGTTGAGTTGGCCGGGACGTTTACTTTGAAAAATTAGAGTGTTCAAAGCAGGCCCTGTATAATG  
GTGCATGGAATAATGGAATAGGATTTCCGATTTTGTGGTTATTGGAAGTCGAAATAATGATAAAT  
AGGGACGACGGGGCATTTCGTATTGCACGGTTAGAGGTGAAATTCTCGGATCCGTGCAAGACGAAC  
TACAGCGAAGGCGTCTGCCAAGTGCCTTTTATTAATCAAGAGCGACAGTCAGAGGTTCGAAGACG  
ATCAGATACCGTCGTAGTTCTGACCATAAACGATGCCAGCTAGGGATGGGCGGACGTTGCACGACT  
CCGCCCCGACCTTCCGGGAAACCAAAGCTTTTAGGTTCCGGGGGAAGTATGGTTGCAAAGCTGAAA  
CTTAAAGGAATTGACGGAAGGGCACCACCAGGAGTGGAGCCTGCGGCTTAATTTGACTCAACACGG  
GGAAACTCACCCGGCCCCGGACACCGTTAGGATTGACAGATTGAAAGCTCTTTCTTGATTCCGGTGGG  
TGGTGGTGCATGGCCGTTCTTAGTTGGTGGAGCGATTTGTCTGGTTAATTCCGATAACGAACGAGA  
CTCTAGCCTGCTAAATAGTTTCATCGGTTCCGCCGGTGAACCTTCTTAGAGGGACAAGTGGCGTTCAG  
CCACGCGAGATTGAGCAATAACAGGTCTGTGATGCCCTTAGATGTCCGGGGCCGCACGCGCGCTAC  
ACTGAAGGAATCAACTGGT--CCTCCTGTCTGAAAAGGATGGGTAACCCGATGAACCTCCTTCGT  
GCTAGGGATTGGGGTTTGTAAATCTTCCCCATGAACGAGGAATTCCCAGTAAGCGCGAGTCATCAA  
CTCGGTTGATTACGTCCCTGCCCTTTGTACACACCGCCCGTCGCTACTACCGATTGGATGGTTTA  
GTGAGATCCTCGGACCGGTCCCGTCAGCGGTTCCGCCGACGCGCTGCTGGGAAGAAGCTCGAAC  
TTGGTCATCTAGAGGAAGTAAAAGT-----CATTCCTCAG  
TAACGGCGAGTGAACCGGGAGGAGCCCAGCACCGAATCCCGTGCCGCTA-GGCACCGGAACTGTG  
GTGTTAAGGAGAGCCTGTGGAGCAGCGG-TGCGTCCGAGTCCCCATGAACGGGGTTTGCCAGAGCG  
GGTGTTAGTCTCTATGGCGCCCCGCACTGTTGCTCAGTACCTCCTAGGAGTCGGATTGTTTGAGA  
ATGCAGTCCAAAGCGGGTGGTAAACTCCATCTAAGGCTAAATACTGGCACGAGTCCGATAGCGAAC  
AAGTACCATGAGGGAAAGTT-----  
-----  
-----  
-----  
-----  
-----

>Rhynchospio\_arenincola

-----  
-GCATAATAATTTGCCTCTTAATTAGAGGCTGGCATGAATGAACCCACGAGAGTCTAACTGTTTCA  
TCCTTGCTAAAAACTATCCTTAAAATGAAGAGATTTTAATAAAAATAAAAAGACAAAAAGACCCAT  
TGAGCTTTATCTAAAACCTTCCCCCTGCCTAAGATTTTGTGGGGCGACATAAGAAGATTAGATCT  
TCTTACAAAATAAATATGATCCGCCGCGATAAAGAAACCAGCTACCATAGGGATAACAGGCTAATC  
TTCCTTAAGAGCCCGAATTGACAGGAAGGT-----  
-----TTAAGCCATG  
CAAGTCTAAGTACGAGCCCAGCACGGCGAAACCGCGGATGGCTCATTAAATCAGTTATGGTTCCCTT  
AGATCGTCCCGTCCCTACTCGGATAACTGTAGTAATTCTAGAGCTAATACGTGCCACGAAGCTCCGA  
CCTTCGGGGAAGAGCGCATTATTAGACCAAAGCCAATCGGGGCGTCT--GTCATGGTGACTCTGG  
ATAACTACAAGTCGATCGCACGGCCGCGCCGGCGACAGATCTATCAAATGTCTGCCCTATCAAGTC  
TCGACGGTTGTTTAGCCGGCAACCGTGCTGATAACGGGTGACGGGGAATCAGGGTTCGATTCCGGA  
GAGGGAGCATGAGAAACGGCTACCACTTCCAAGGAAGGCAGCAGGCACGCAAATTACCCACTCCCC  
GCTCGGGGAGGTAGTGACGAAAAATAACAATACGGGACTCTTACGAGGCCCGTAATTGGAATGAG  
TACACTTTAAATCCTTTAACGAGGATCCATTGGAGGGCAAGTCTGGTGCCAGCAGCCGCGGTAATT  
CCAGCTCCAATAGCGTATATTAAAGTTGTTGCAGTTAAAAGCTCGTAGTTGGACGTGGGGAGCAG  
CCCGGCGGTCCGCTCGACGGCGG-TCACTGCCTCCTGCTCCTCTTGCCGGCGGTGCGGGGTGCTCT  
TGGTTGGTGCTGCCGGGACGTTTACTTTGAAAAATTAGAGTGTTCAAAGCAGGCCCTGAATACTG  
GTGCATGGAATAATGGAACAGGACCTCGCGTTTTCGTTGGTTTTACGAAGTCGAGGTAATGATTAAT  
AGGGACCGCGGGGGCATTGTATTGCGCCGTTAGAGGTGAAATTCTTGGATCGGCGCAAGACAAAC  
TAGAGCGAAGGCGTTTGCCAAGCACGTCTTCATTAATCAAGAGCGACAGTCAGAGGTTTCAAGACG  
ATCAGATAACCGTCGTAGTTCTGACCATAAACGATGCCAGCTAGGGACTCGCGGCGGTTGCTTGACC  
CCGCGAGGACCTCCCCGAAACGAAAGCTTTCCGGGTTCCGGGGGAAGTATGGTTGCAAAGCTGAAA  
CTTAAAGGAATTGACGGAAGGGCACCACCAGGAGTGGAGCCTGCGGCTTAATTTGACTCAACACGG  
GGAAACTCACCCGGCCCGGACACCGTGAGGATTGACAGATTGAGAGCTCTTTCTTGATTCCGGTGGG  
TGGTGGTGATGGCCGTTCTTAGTTGGTGGAGCGATTTGTCTGGTTGATTCCGATAACGAACGAGA  
CTCTAGCCTATTGAATAGTCGGCCTGCTAGCGGGCGTGACTTCTTAGAGGGACGAGCGGCTTTTCAG  
CCGTACGAGATTGAGCAATAACAGGTCTGTGATGCCCTTAGATGTCCGGGGCCGCACGCGCGCTAC  
ACTGAAGGACTCAGCGTGTG-TCTCCTGCTCAGAAATGAGTGGGCAACCCGTTGAACCTCCTTCGT  
GCTAGGGATTGGGGATTGCAATTGTTCCCATGAACGAGGAATTTCCAGTAAGCGCGAGTCATCAG  
CTCGCGTTGATTACGTCCCTGCCCTTTGTACACACCGCCCGTCTACTACCGATCGGATGGTTTA  
GTGAGACCCTCGGACTGGTCCCGACGGCAGTTCTCTGTCTGTCGCGGTGCCGGGAAGACGGTCAAC  
TTGACTATCTAGAGGAAGTAA----TCACTAAGCGGAGGAAAAGAACTAACAAGGATTTCCCTAG  
TAACGGCGAGTGAAGCGGGAAGAGCCCAGCACCGAATCCCCTGCGCTCG-CGCAGAGGGAGCTGTG  
GTGTTTGGGAGAGCCTCTGGTGCAGTGCACGGTCCGAGTCTCCTTGATCGGGGTTGCCCATAGCG

GGTGT CAGGCCTCTACGACCGGCGGCCGCTGCCTCTGCGCCTCCCAGGAGTCGGGTTGTTTGAGA  
ATGCAGCCCAAAGCGGGTGGTAAACTCCATCTAAGGCTAAATACCGGCACGAGACCGATAGTAGAC  
AAGTACCGTGAGGGAAAGTT-----  
-----  
-----  
-----  
-----

>Rhynchospio\_foliosa

-----AAAGGT  
AGCATAATAATTTGCCTCCTAATTAGAGGCTCGCATGAATGAATGCACGAGAGTCTAGCTGTTTCA  
CTTCTAATAAAAACTATCCTTTAAGTGAAGAGACTTAAATAAAAATAAAAAGACAAAAGACCCAT  
TGAGCTTTACTTAAATGCCACACCTACCCACAAGTTTTGTTGGGGCGACAGAGGAAGACTTAATCT  
TCCTTCTTCAAAGAGCGATCCACTATGATAAAGAAACCAGCTACCATAGGGATAACAGGCTAATC  
TTCTTTGAGAGCCCAAATTGACAAGAAGGTTTGGCACCTCGATGTTGGCTTAAGGTACCTGACAGA  
TGCAGAAGTAAGTGGGTTTGTTCACCTTTAATACCTT-----ATTAAGCCATG  
CACGTCTAAGTACAAGCCTCAGAAGGCGAAACCGCGAACGGT---ATAAATCAGTTGTGGTTCTGT  
TTGATG-GTGACCCTAGTTGGACAACCTGTGGCAATTCTAGAGCTAATACATGAAATTAAGCTCCGA  
CCTTCGGGGACGAGCGCTTTTATTAGACCAAAACCAACCGTGCCGGCGGAATTATGGTGACTCTGG  
ATGA-CACATGTGGATCGCAAGGCTAAGCAGGCGACAGATCTTTCGAACGTCTGCCCTATCAAGTC  
TCGACGGTTGTAGAGGGGCCAACCGTGCTGATAACGGGTGACGGGGAATCAGGGTTTCGATTCCGGA  
GAGGGAGCCTGAGAAACGGCTACCACTTCCAAGGAAGGCAGCAGGCGCGCAAATTACCCACTCCTA  
GCCCAGGGAGGTAGTGACGAAAATAACAATGCTGGTCTCTCACGAGGCCAGTAATTGGAATGAG  
TACACTTTAAAGACTTTAACCAGGACCTATTGGAGGGCAAGTCTGGTGCCAGCAGCCGCGGTAATT  
CCAGCTCCAATGGCGTATACTAAAGTTGTTGCAGTTAAAAAGCTCGTAGTTGGATCTCGGGGAGCG  
AGCGTCGGTCTCTTCGCGGAGGCTTACTGGCTCACGCTCTCTGCGCAGTCCGGCCCCGGGTGCCCT  
TGATTGTCGCCGCTGCGACGTTTACTTTGAAAAAATTAGAGTGTTCAAAGCAGGCCCTGGATAGTC  
ATGCATGGAATAATGGAAGAGGGCCTCGAAGTTTGTGGCCTTGAGATGTGAGGCAATGACTAAG  
AGGGACGACGGGGACATTTATATTGCGCCAGGAGAGGTGAAATTCTTGGATTGGCGCAAGATAAAC  
TGGAGCGAAGGCGTTTGTCAAGCACGTCTTCTTAATCAAGAGCGACAGTCAGAGGCTCGAAGACG  
ATCAGATACCGTCGTAGTTCTGACCGTAAACGCTGCCAGCTAGGGATTTCGCTGTGGTTGCTAGACC  
CTGCGAGGACCTTCCCGGAAACGAAAGCTTTCCGGGTTCCGGGGGTAGTATGGTTGCAAAGCTGAAA  
CTTAAAGGAATTGACGGAAGGGCACCACCAGGAGTGGAGCCTGCGGCTT-ATTTGACTCAACACGG  
GGAATCTCACCCGGCCCGGACACCGTGAGGATTGACAGATTGAGAGCTCTTTCTTGATTCCGGTGGG  
TGGTGGTGCATGGCCGTTCTTAGTTGGTGGAGTGATTTGTCTGGTTAATTCCGATAACGAACGAGA

CTCTAGCCTATTAAGTCAAGCCCCCTAAGGGGAGTGACTTCTTAGAGGGACAAGTGGCTTTTCAG  
TCACACGAGATTGAGCAATAACAGGTCTGTGATGCCCTTAGATGTCCGGGGCCGCACGCGTGCTAC  
ACTGAAGGACTCAGCGTGTG--CTCCTTGCCTGAAAAGGCTGGGCAACCCGTTGAACCTCCTTCGT  
GCTAGGGATTGGAGCTTGAATTTGTTCCCCATGAACGAGGAATTTCCAGTACGCGCCAGTCATCAG  
CTGGCGTTGATTACGTCCCTGCCCTTTGTACACACCGCCCGTCGCTACTACCGATCGGATGGTTTA  
GTGAGACCCTCGGACTGGTCCGTACGGCACCTCGGTGCTGTCTCGGCGCCGGGAAGACGGTCAAAC  
TTGACTATCTAGAGGAAGTAAAAGTTCACTAAGCGGAGGAAAAGAACTAACAGGATTCCCCTAG  
TAACGGCGAGTGAAGCGGAAGAGCCCAGCACCGAATCCCCTGCTTTACACGTAGCGGAACTGTG  
GTGTTAGGGAGAGCCTCTGGTCAGGGAGTTGCGGCCAAGTCTTGTGAAGAAGGGCTCCCCTGGAG  
GGTGTGAGCCCGTACGCTGACAGCTCCTTGACCTCTGCGCCTCCTTGGAGTCGGGTTGTTTGA  
ATGCAGCCCTAAGCGGGTGGTAACTCCATCTAAGGCTAAATATCAGCACGAGACCGATAGCAGAC  
AAGTACCGTGAGGGAAAGTTGAAAAGAAGTTTGA-----  
-----  
-----  
-----  
-----

>Sabella\_pavonina

AGCCTGTAGATTACAGGTATCCCCTGCCCGGTGTTAACGGCCACAGTATCCTGACTGTGCAAAGGT  
AGCATAATAATTTGCCATTTAATTGGTGGCTAGTATGAATGGGTAAACAGAGATTTATTTTATTCT  
TATT--CTGTAAATTAGTAATTATGTGAAAACCATAAATTTACCTGAAAGACAAAAGACCCCTAC  
TGAGCTTAAAGATTCCC-----CACCTCTTTTAGCTGGGACGACTAAAGAGCAAACCTAAAC  
CTCTTAGATTATATACTGCCCTTAATGATCCGAATATAAGTTACCATAGGGATAACAGGCTAATT  
CTCCTTAGGAGCCCAAATCGACAGGAGAGCTTGGCACCTCGATGTTGGCTTAGGGTACTCTTTCC  
TGCAGAAGGAAGTTGGTTTTGTTCAACCATTAAACCCCT-----  
-----TAAGTACATACTTAACACGGTGAACCTGCGAATGGCTCATTAAATCATATGTTATTTCTT  
AGATCGTACAATCCTACTTGGATAACTGTGGTAATTCTAGAGCTAATACATGCATCAAAGCTCCGA  
CCTCCGGGGAAGAGCGCTTTTATTAGACCAAACCAATGGGGGCGTCC---CGTTGGTACTCTGA  
ATAACTTTAAGCTGATCGCATGGCCGTGCCGGCGACGTATCTTTCAAGTGTATGCCCTATCAATTG  
TCGAAGGTAAGTACTTGGCTTACCTTGATGATAACGGGTAGCGGGGAATCAGGGTTCGATTCCGGA  
GAGGGAGCATGAGAAACGGCTACCACATCCAAGGAAGGCAGCAGGCGCGCAAATTACCCACTCCTG  
ACACGGGGAGGTAGTGACGAAAATAACAATACGGGACTCTTTTCGAGGCCCCGTAATTGGAATGAG  
TACACTTTAAATCCTTTAACGAGGATCTATTGGAGGGCAAGTCTGGTGCCAGCAGCCGCGGTAATT  
CCAGCTCCAATAGCGTATATTAAGTTGTTGCAGTTAAAAGCTCGTAGTTGGATCTCGGGTCCGG  
ACTGGCGTCTATTACAGTAGGT--ACTGCTTGTTCGACCCCGCGGTTTCCCTTGGTGTCTCT







????????????????????????????????????????????????????????????????????????????????????  
????????????????????????????????????????????????????????????????????????????????????  
????????????????????????????????????????????????????????????????????????????????????  
????????????????????????????????????????????????????????????????????????????????????  
????????????????????????????????????????????????????????????????????????????????????  
????????????????????????????????????????????????????????????????????????????????????  
????????????????????????????????????????????????????????????????????????????????????  
????????????????????????????????????????????????????????????????????????????????????  
????????????????????????????????????????????????????????????????????????????????????

>Spio\_filicornis

-----TTAAAGGTCCCTCCCTGCCCAATGTCAATGGCCGCGGTACCTTGACCGTGCTAAGGT  
AGCATAATAATTTGTCTTTAATTAAGACTGGAATGAATGGAACACGAGAGTTAAGCTGTTTCC  
TTCCTAATAAAAATTAACCTGTAAGTGAAGAGGCTTACATAAAAATAAAAAGACAAAAGACCCAT  
TGAGCTTTACTACTCACGTTTTTCTACACGTAGTTTTGTTGGGGCAACAAGAGAGGACTTTATCT  
TCTCTAATACTATAACAGATCCGATGCGATATTAGAAAAAGCTACCATAGGGATAACAGGCTAATC  
CTTCTTAAGAGATCAAATTTGACAGAAGGGTTTGGCACCTCGATGTTGGCTTAGGGGACCATTTAGA  
TGCAGAAGTTTGTGGGTTTGTTCACCTTTAAAACCCATATGCTTGTCTCAAAGACTAAGCCATG  
CATGTCTAAGTATAAGCTCGACACGGCGAAACCGCGAATGGCTCATTAATCAGTTATGGTTCCCTT  
AGATCGTACTATCCTACTTGGATAACTGTAGTAATTCTAGAGCTAATACATGCAACGAAGCTCCGA  
CCCTCGGGGAAGAGCGCTTTTATTAGATCAAACCAGAGGTCTCGGCCAACCTTTGGTGACTCTGG  
ATAACTTC-AGCCGATCGCACGGCCGAGCCGGCGACGTATCTTTCAAATGTCTGCCCTATCAACTT  
TCGACGGTTGGTGACTTGCCAACCGTGTTATTACGGGTAGCGGGGAATCAGGGTTTCGATTCCGGA  
GAGGGAGCATGAGAAACGGCTACCACATCCAAGGAAGGCAGCAGGCGCGCAAATTACCCACTCCTA  
GCTCGGGGAGGTAGTGACGAAAATAACAATACGGGACTCTTACGAGGCCCCGTAATTGGAATGAG  
TACACTTTAAATCCTTTAACGAGGATCTATTGGAGGGCAAGTCTGGTGCCAGCAGCCGCGTAATT  
CCAGCTCCAATAGCGTATATTAAGTTGTTGCAGTTAAAAGCTCGTAGTTGGATCTCGGGAGAGG  
GCCGGCGGTCCGCCTCGCGGCGGTTCACTGCCCCCTCCTCCCCTCGCCGGTCTCCCCGGTGCCCT  
TCGTTGGGTGGGCCGGAGCGTTTACTTTGAAAAAATTAGAGTGTTCAAAGCAGGCCTTGATACCG  
TTGCATGGAATAATGGAATAGGACCTCGGATTTTGTGGTTTTCGGAACCGGAGGTAATGATTAAT  
AGGGACCGCGGGGGCATTGTATTGCGCGGTTAGAGGTGAAATTCTTGGATCCGTGCAAGACAGAC  
TACAGCGAAGGCGTCTGCCAAGCACGTCTTCTTTAATCAAGAGCGACAGTCAGAGGTTCGAAGACG  
ATCAGATACCGTCTAGTTCTGACCATAAACTATGCCAGCTAGGGATTTCGCGGGCGGTTGTACGACT  
CGGCGAGGACCTTCCCGGAAACGAAAGCTTTTGGGTTCCGGGGGAAGTATGGTTGCAAAGCTGAAA  
CTTAAAGGAATTGACGGAAGGGCACCACCAGGAGTGGAGCCTGCGGCTTAATTTGACTCAACACGG  
GAAACTCACCCGGCCCGGACACCGTAAGGATTGACAGATTGAGAGCTCTTCTTGATTTCGGTGGG  
TGGTGGTGCATGGCCGTTCTTAGTTGGTGGAGCGATTTGTCTGGTTAATTCGATAACGAACGAGA



CTCTAGCCTATTAATAGTTCGCCGGTTAGCCGGCGCAACTTCTTAGAGGGACAGGTGGCGTTCAG  
CCACGCGAGATTGAGCAATAACAGGTCTGTGATGCCCTTAGATGTCCGGGGCCGCACGCGCTAC  
ACTGAAGGACTCAGCGTGT--TCTCCTGGCCAGAAATGGTCGGGCAACCCGTTGAACCTCCTTCGT  
GCTAGGGATTGGGGGTTGCAATTGTTCCCCATGAACGAGGAATCCCAGTAAGCGCGAGTCATCAG  
CTCGCGTTGATTACGTCCCTGCCCTTTGTACACACCGCCCGTCGCTACTACCGATCGGATGGTTTA  
GTGAGACACTCGGACTGGTCCCGACGGCGGGTGACCGCCTTCGTGTTGCCGGGAAGAATGTCAAAC  
TTGATTATCTAGAGGAAGTAAAAGT?????????????????????????????????????  
?????????????????????????????????????????????????????????????  
?????????????????????????????????????????????????????????????  
?????????????????????????????????????????????????????????????  
?????????????????????????????????????????????????????????????  
?????????????????????????????????????????????????????????????  
?????????????????????????????????????????????????????????????  
?????????????????????????????????????????????????????????????  
?????????????????????????????????????????????????????????????  
?????????????????????????????????????????????????????????????  
?????????????????????????????????????????????????????????????  
?????????????????????????????????????????????????????????????  
?????????????????????????????????????????????????????????????  
?????????????????????????????????????????????????????????????  
?????????????????????????????????????????????????????????????  
?????????????????????????????????????????????????????????????  
?????????????????????????????????????????????????????????????

>Spio\_sp\_2573

-----  
-GCATAATAATTTGTCTTTTAATTAAGACTGGAATGAATGGAACACGAGAGTTAAGCTGTTTCC  
CCCTTAATAAAAATTAACCTGTAAGTGAAGAGGCTTATATATAATAAAAAGACAAAAGACCCCTAT  
TGAGCTTTACTACACCTGTTTTCTTTGTTAGTAGTTTTGTTGGGGCAACAAGAGAGGACTTTATCT  
TCTCTAATATCTTAACAGATCCGATGCGATATTAGAAAAGCTACCATAGGGATAACAGGCTAATC  
CTTCTTAAGAGATCAAATTGACAGAAGGGT-----  
-----  
-----TAAATCAGTTATGGTTCCTT  
AGATCGTACTATCCTACTTGGATAACTGTAGTAATCTAGAGCTAATACATGCAACGAAGCTCCGA  
CCCTCGGGGAAGAGCGCTTTTATTAGACCAAACCAGAGGTCTCGGCCAACCTTTGGTGACTCTGG  
ATAACTTC-AGCCGATCGCACGGCCGAGCCGGCGACGTATCTTTCAAATGTCTNCCCTATCAACTT  
TCGACGGTTGGTGACTTGCCAACCGTGGTTATTACGGGTAGCGGGGAATCAGGGTTCGATTCCGGA  
GAGGGAGCATGAGAAACGGCTACCACATCCAAGGAAGGCAGCAGGCGCGCAAATTACCCACTCCTA  
GCTCGGGGAGGTAGTGACGAAAATAACAATACGGGACTCTTACGAGGCCCGTAATTGGAATGAG  
TACTTTTAAATCCTTTAACGAGGATCTATTGGAGGGCAAGTCTGGTGCCAGCAGCCGCGGTAATT  
CCAGCTCCAATAGCGTATATTAAAGTTGTTGCAGTTAAAAGCTCGTAGTTGGATCTCGGGAGAGG  
GCCGGCGTCCGCCTCGCGGCGGTTCACTGCCCCCTCCTCCCCTCGCCGGTCTCCCCGGTGCCCT

TCGTTGGGTGGGCCGGAGCGTTTACTTTGAAAAAATTAGAGTGTTCAAAGCAGGCCTTGTATACCG  
TTGCATGGAATAATGGAATAGGACCTCGGATTTTGTGGTTTTTCGGAACGCGAGGTAATGATTAAT  
AGGGACCGCGGGGGCATTGTATTGCGCGGTTAGAGGTGAAATTCTTGGATCCGTGCAAGACAGAC  
TACAGCGAAGGCGTCTGCCAAGCACGTCTTCTTTAATCAAGAGCGACAGTCAGAGGTTGCAAGACG  
ATCAGATACCGTCGTAGTTCTGACCATAAACTATGCCAGCTAGGGATTTCGCGGGCGTTGTACGACT  
CGGCGAGGACCTTCCCGGAAACGAAAGCTTTTGGGTTCCGGGGGAAGTATGGTTGCAAAGCTGAAA  
CTTAAAGGAATTGACGGAAGGGCACCACCAGGAGTGGAGCCTGCGGCTTAATTTGACTCAACACGG  
GGAAACTCACCCGGCCCGGACACCGTAAGGATTGACAGATTGAGAGCTCTTTCTTGATTTCGGTGGG  
TGGTGGTGCATGGCCGTTCTTAGTTGGTGGAGCGATTTGTCTGGTTAATTCGATAACGAACGAGA  
CTCTAGCCTATTAATAGTTCGCCGTTAGCCGGCGCAACTTCTTAGAGGGACAGGTGGCGTTCAG  
CCACGCGAGATTGAGCAATAACAGGTCTGTGATGCCCTTAGATGTCCGGGGCCGCACGCGCGCTAC  
ACTGAAGGACTCAGCGTGT--TCTCCTGGCCAGAAATGGTCCGGCAACCCGTTGAACCTCCTTCGT  
GCTAGGGATTGGGGTTGCAATTGTTCCCATGAACGAGGAATTCAGTAAGCGCGAGTCATCAG  
CTCGCGTTGATTACGTCCCTGCCCTTGTACACACCGCCCGTTCGCTACTACCGATCGGATGGTTTA  
GTGAGACACTCGGACTGGTCCCGACGGCGGGTGACCGCCTTCGTGTTGCCGGGAAGAATGTCAAAC  
TTGATTATCTAGAGGAAGTAAAAGTTCACTAAGCGGAGGAAAAGAACTAACAGGATTCCTTAG  
TAACGGCGAGTGAAACGGGAAGAGCCCAGCACCGAATCCCTGCATCGACTGTAGAGGGAAGTGTG  
GTGTTAAGGAGAGCCTGTGGAGCGGGAG-GCGTCCGAGTCCTCCTGATTGGGGTTGCCAGAGCG  
GGTGTGAGGCTCTACGGCGCCCCGCCCGTTGCTCAGTACCTCCTAGGAGTCGGGTTGTTTGAGA  
TTGCAGCCCAAAGTGGGTGGTAAACTCCATCTAAGGCTAAATACTGGCACGAGACCGATAGCAAAC  
AAGTACCGTGAGGGAAAGTT-----  
-----  
-----  
-----  
-----  
-----

>Spiophanes\_cf\_convexus

CGCCTCTAGATTAGAGGTTTCATCCTGCCCTATGTAAATGGCCGCGGTACTTTGACCGTGTTAAGGT  
AGCATAATAATTTGCCTTTTAATTGAAGGCTTGTATGAATGGATAAACGAGAATAAAGCTGTCTCA  
ATTTTAATAAAAATTAATATTCAAATGAAGAAGTTTGAATAAAAATAAAAAGACAAGAAGACCCGTG  
TGAGCTTTATCTCAGATATTTTCTTGAATGAGATTTAATTGGGGCGATTAAGGAAGAATAAAATC  
TTCCTAAAAGTTAAATGTATCCATAGTGA-TAAATAATTAGCTACCACAGGGATAACAGGCTAATT  
TCTTTTAAGAGTTCATATCGAAAAAGAAGTTTGGCACCTCGATGTTGGCTTAGGATAAGAATTA  
TGCAGAAGTACTGGGTTTGTTCACCCCTTAAATTCCT-----AAGATTAAGCCATG  
CATGTCTAAGTACAAGCTTAACACGGTGAACCGCGAATGGCTCATTAAATCAGTTATGGTTCCCTT

AGATCGTACAATCCTACTTGGATAACTGTAGTAATTCTAGAGCTAATACATGCAAGCAAGCTCCGA  
CCTTCGGGGAAGAGCGCTTTTATTAGACCAAAACCAAT--GGGCGACCTTCCTTTGGTGACTCTGG  
ATAACTTT--GCTGATCGAATGGCCGTGCCGTGCATGTATCTTTCAAATGTCTGCCCTATCAAGTT  
TCGTAGGTAGTCGATATGACTACCTAGCTTGTAAACGGGTAACGGGGAATCAGGGTTTCGATTCCGGA  
GAGGGAGCATGAGAAACGGCTACCACATCCAAGGAAGGCAGCAGGCGCGCAAATTACCCACTCCTG  
GCACGGGGAGGTAGTGACGAAAAATAACAATACGGGACTCTTTCGAGGCCCCGTAATTGGAATGAG  
TACACTTTAAATCCTTTAACGAGGATCTATTGGAGGGCAAGTCTGGTGCCAGCAGCCGCGGTAATT  
CCAGCTCCAATAGCGTATATTAAGTTGTTGCAGTTAAAAAGCTCGTAGTTGGATCTCGGGAGCAG  
GCTGGCGGTCCGCCTCGCGGCGG-TTACTGCCCCTGCCCCCTGCCGTCTTCCCTTGGTACTCT  
TCATTGGGGTGGACGGAACGTTTACTTTGAAAAATTAGAGTGTTCAAAGCAGGCCCTGAATAATG  
GTGCATGGAATAATGGAATAGGACCTCGGATTTTGTGGTTTTTCGGAACCTGAGGTAATGATTAAG  
AGGGACAGCGGGGGCATTAGTATTACGGTGTAGAGGTGAAATTCTTGGATCGCCGTAAGACTAAC  
TACTGCGAAAGCATTGCCAAGCATGTTTTCTTTAATCAAGAACGAAAGTCAGAGGTTCGAAGACG  
ATCAGATACCGTCGTAGTTCTGACCATAAACGATGCCAGCTAGGGATTTCGCCGGCGTTGTATGACT  
CGGCGAGCACCTTCGGGAAACCAAAGCTTTTGGGTTCCGGGGGAAGTATGGTTGCAAAGCTGAAA  
CTTAAAGGAATTGACGGAAGGGCACCACCAGGAGTGGAGCCTGCGGCTTAATTTGACTCAACACGG  
GAAAACACCCCGCCCGGACACTGTAAGGATTGACAGATTGAGAGCTCTTTCTTGATTTCGGTGGG  
TGGTGGTGCATGGCCGTTCTTAGTTGGTGGAGCGATTTGTCTGGTTAATTCCGATAACGAACGAGA  
CTCTAGCCTATTAATAGTTTCGCCGATTTCGTCCGCGCAACTTCTTAGAGGGACAAGTGGCGTTTAG  
CCACGCGAGATTGAGCAATAACAGGTCTGTGATGCCCTTAGATGTTTCGGGGCCGCACGCGCGCTAC  
ACTGAAGGGATCAACGTGTGTTCTCCTGGCCCGGAAGGGTCCGGTAACCCCTTGAACCCCTTCGT  
GCTTGGGATAGGGCTTGCAATTACCCCT-TGAACGAGGAATTCCCAGTAAGCGCGTGTATCAG  
CACGCGTTGATTACGTCCCTGCCCTTTGTACACACCGCCCGTCGCTACTACCGATTGGATGGTTTA  
GTGAGACCCTCGGATTGGTCCCGCGGTGGGCGACCGCTGCCGTGGCGCCG-AAAGACGGTCAAAC  
TTGACTATCTAGAGGAAGTAAAAGTTCACTAAGCGGAGGAAAAGAACTAACAAGGATTCCCCCTAG  
TAACGGCGAGTGAAGCGGAAGAGCCCAGCACCGAATCCCCTGCATGAACTGTAGCGGGAACGTGT  
GTGTTTGGGAGAGCCTCTGGAGCGCCCGCGGCGTCCGAGTCTCCTGATCGGGGCTACCCATAGCG  
GGTGTACGGCCTTACGGCCTCCGGCGTCTTCTCTGAGCCTCCCTGGAGTCCGGTTGTTTGGGA  
ATGCAGCCCTAAGTGGGTGGTAAACTCCATCTAAGGCTAAATACTGGCACGAGTCCGATAGCGGAC  
AAGTACCGTGAGGGAAAGTT-----  
-----  
-----  
-----  
-----  
-----

>Spiophanes\_uschakowi

-----  
-GCATAATAATTTGCTTTTTAATTGAAGGCTTGTATGAATGGATAAACGAGAATAAAGCTGTCTCA  
ATTTTAGTATAAAATTAATATTCAAATGAAGAAGTTTGAATAATATAAAAAGACAAGAAGACCCCTGT  
TGAGCTTTATTTATTATATTATTTTAAATATAAATTTAATTGGGGTGATTAAGGAAGAAAAAATC  
TTCCTAGAAAATTTAGTGTATTCAAAATGA-TAAATAATAAGCTACCACAGGGATAACAGGCTAATT  
TCTTTTGAGAGTTCATATCGAAAAAGAAGT-----  
-----AAAGATTAAGCCATG  
CATGTCTAAGTACAAGCTTCACAAGGTGAAACCGCAATGGCTCATTAAATCAGTTATGGTTCCTT  
AGATCGTACAATCCTACTTGGATAACTGTAGTAATTCTAGAGCTAATACATGCAATCAAGCTCCTA  
CCTTCGGGGAAGAGCGCTTTTATTAGACCAAACCAAT--GGGCAACCGTCCTTTGGTGACTCTGG  
ATAACTTC--GCTGATCGTATGGCCGCGCCGTCGATGTATCTTTCAAATGTCTGCCCTATCAAGTC  
TCGTAGGTAGTCGACATGACTACCTAGCTGATTACGGGTAACGGGGAATCAGGGTTCGATTCCGGA  
GAGGGAGCATGAGAAACGGCTACCACATCCAAGGAAGGCAGCAGGCGCGCAAATTACCCACTCCTG  
GCACGGGGAGGTAGTGACGAAAAATAACAATACGGGACTCTTTTCGAGGCCTCGTAATTGGAATGAG  
TACACTTTAAATCCTTTAGCAAGGATCTATTGGAGGGCAAGTCTGGTGCCAGCAGCCGCGGTAATT  
CCAGCTCCAATAGCGTATATTAAGTTGTTGCAGTTAAAAAGCTCGTAGTTGGATCTCGGGAGCAG  
GCTGGCGGTCCGCCTCGCGGCGG-CTACTGCCTGTCTGCCCCCTGCCGTCATCCAGGGTACTCT  
TCGTTGGGCTGGGCGGTTTCGTTTACTTTGAAAAATTAGAGTGTTCAAAGCAGGCCCTGAATAATG  
GTGCATGGAATAATGGAATAGGACCTCGGATTTTTGTTGGTTAAGGAAGTGGAGGTAATGATTAAG  
AGGGACTGCGGGGGCATTAGTATTACGGTGTAGAGGTGAAATTCAAGGATCATCGTAAGACTAAC  
TACAGCGAAAGCATTGCGCAAGAACGTTTTCTTTAATCAAGAACGAAAGTCAGAGGTTGCAAGACG  
ATCAGATAACCGTCGTAGTTCTGACCATAAACAATGCCAGCTAGGGATCCGCCTGTGTTGTACGACC  
GGGCGAGGACCTTCCGGGAAACCAAAGCTTTTGGGTTCCGGGGGAAGTATGGTTGCAAAGCTGAAA  
CTTAAAGGAATTGACGGAAGGGCACCACCAGGAGTGGAGCCTGCGGCTTAATTTGACTCAACACGG  
GAAAACCTCACCCGGCCCGGACACTGTAAGGATTGACAGATTGAGAGCTCTTTCTTGATTCCGGTGGG  
TGGTGGTGCATGGCCGTTCTTAGTTGGTGGAGCGATTTGTCTGGTTAATTCGATAACGAACGAGA  
CTCTAGCCTATTAATAGTTCGCCGATTTCGTGCGCGCAACTTCTTAGAGGGACAAGTGGCGTTTAG  
CCACGCGAGATTGAGCAATAACAGGTCTGTGATGCCCTTAGATGTTCCGGGGCCGCACGCGCGCTAC  
ACTGAAGGGATCAGCGTGTGTTCTCCTGGCCCGGAAGGGTCCGGTAACCCGTTGAACCCCTTCGT  
GCTTGGGATAGGGCTTGCAATTACCCCT-TGAACGAGGAATTCAGTAAGCGCGTGTATCAG  
CACGCGTTGATTACGTCCCTGCCCTTTGTACACACCGCCGTCGCTACTACCGATTGGATGGTTTA  
GTGAGACCCTCGGATTGGTCCCGACGGCGGGCAACCGCCGTCGTGGCGCCGAAAAGACGGTCAAAC  
TTGACTATCTAGAGGAAGTAAAAGTTCACTAAGCGGAGGAAAAGAACTAACAAGGATTCGCCCTAG  
TAACGGCGAGTGAAGAGGGAAGAGCCCAGCACCGAATCCCTGCATTGACTGTAGTGGGAACTGTG  
GTGTTTGGGAGAGCCTCTGGAGTTGTGCCTGCGTCCGAGTCTCCTGATCGGGGTTGCCCATAGCG



-----  
-----  
-----  
-----  
-----  
-----  
-----TCACTAAGCGGAGGAAAAGAACTAACAAGGATTCCCCTAG  
TAACGGCGAGTGAAGCGGAAGAGCCCAGCACCGAATCCCCGGCGGTCTCCGTCGCGGGAACGTG  
GTGTTTGGGAGCGCCAATGGGGCGCCGCCGGCGTCCGAGTCTCCTGATCGGGGTCACCCAGAGCG  
GGTGTCAAGCCTCTACGGCCTCCGGCGTCGTCCCTCTGAGCCTCCCCGGAGTCGGGTTGTTTGGGA  
ATGCAGCCCAAAGTGGGTGGTAAACTCCATCTAAGGCTAAATACCGGCGTGAGTCCGATAGCGGAC  
AAGTACCGTGAGGGAAAGTTGAAAAGAAGTTTGAAGAGAGAGTTCA-----  
-----  
-----  
-----  
-----

>Trochochaeta\_multisetosa

-----  
-----  
-----GCATAATCATTTCCTYTTAATTAGAGGCTGGAATGAATGGATAAACGAAATTACAACGTCTCC  
TCTCTGATAAAAAATTAAGCTTCAAGTTAAAACGCTTGGATAAGATAAAAAGGACAAAAAGACCCAT  
TGAGCTTTATTTTACTTCCCAATTGTAATAAAAATTTAGTTGGGGCGACGAAGGAAAAAATAAATC  
TTCCTTATAACAAACATGATCCAACTGATAAAAAGAAAAGCTACCATAGGGATAACAGACTAATC  
TTTTTTAAGAGACCATATTGACAAAAAGGA-----  
-----

-----TAAGTACAAGCTTAACACGGTGAACCCGGAATGGCTCATTAAATCAGTTATGGTTCCTT  
AGATCGTACAATCCTACTTGGATAACTGTAGTAATTCTAGAGCTAATACATGCAAGCAAGCTCCGA  
CCTTCGGGGAAGAGCGCTTTTATTAGACCAAACCAAT--GGGCAACCTTGATCTGGTGACTCTGG  
ATAACTTTGAGCTGATCGCATGGCCGAGCCGGCGACGTATCTTTCAAATGTCTGCCCTATCAACTT  
TCGTAGGTAGTTGATATGACTACCTAGGTTGTAACGGGTAACGGGGAATCAGGGTTCGATTCCGGA  
GAGGGAGCATGAGAAACGGCTACCACATCCAAGGAAGGCAGCAGGCGCGCAAATTACCCACTCCTG  
GCACGGGGAGGTAGTGACGAAAAATAACAATACGGGACTCTTTTGAGGCCCCGTAATTGGAATGAG  
TACACTTTAAATCCTTTAACGAGGATCTATTGGAGGGCAAGTCTGGTGCCAGCAGCCGGTAATT  
CCAGCTCCAATAGCGTATATTAAAGTTGTTGCAGTTAAAAAGCTCGTAGTTGGATCTCGGGTGCAG  
GCTGGCGGTCCGCCTCGCGGCGG-TTACTGCCTGTCTGCCCCAGCCGGTCTCCCTTGGTGCTCT



AGATCGTACAATCCTACTTGGATAACTGTAGTAATTCTAGAGCTAATACATGCAAGCAAGCTCCGA  
CCTTCGGGGAAGAGCGCTTTTATTAGACCAAAACCAAT--GGGCAACCTTGATCTGGTGACTCTGG  
ATAACTTTGAGCTGATCGCATGGCCGAGCCGGCGACGTATCTTTCAAATGTCTGCCCTATCAACTT  
TYGTAGGTAGTTGATATGACTACCTAGGTTGTAACGGGTAACGGGGAATCAGGGTTCGATTCCGGA  
GAGGGAGCATGAGAAACGGCTACCACATCCAAGGAAGGCAGCAGGCGCGCAAATTACCCACTCCTG  
GCACGGGGAGGTAGTGACGAAAAATAACAATACGGGACTCTTTTGAGGCCCCGTAATTGGAATGAG  
TACACTTTAAATCCTTTAACGAGGATCTATTGGAGGGCAAGTCTGGTGCCAGCAGCCGCGGTAATT  
CCAGCTCCAATAGCGTATATTAAGTTGTTGCAGTTAAAAAGCTCGTAGTTGGATCTCGGGTGCAG  
GCTGGCGGTCCGCCTCGCGGCGG-TTACTGCCTGTCTGCCCCAGCCGGTCTCCCTTGGTGCTCT  
TCACTGGGGTGGCCGGAACGTTTACTTTGAAAAATTAGAGTGTTCAAAGCAGGCCCTGGATAATA  
GTGCATGGAATAATGGAATAGGACCTCGGATTTTGTGGTTTTTCGGAGCTCGAGGTAATGATTAAG  
AGGGACGGCGGGGGCATTGTATTACGGTGTTAGAGGTGAAATTTCTGGATCGCCGTAAGACAAAC  
TACTGCGAAAGCATTGCCAAGCATGTTTTCATTAATCAAGAACGAAAGTCAGAGGTTYGAAGACG  
ATCAGATACCGTCGTAGTTCTGACCATAAACGATGCCAGCTAGGGATTTCGTCGGAGTTGTATGACT  
CGACGAGCACCTTCGGGAAACCAAAGCTTTTGGGTTCCGGGGGAAGTATGGTTGCAAAGCTGAAA  
CTTAAAGGAATTGACGGAAGGGCACCACCAGGAGTGGAGCCTGCGGCTTAATTTGACTCAACACGG  
GGAAACTCACCCGGCCCGGACACTGTAAGGATTGACAGATTGAGAGCTCTTTCTTGATTTCGGTGGG  
TGGTGGTGCATGGCCGTTCTTAGTTGGTGGAGCGATTTGTCTGGTTAATTCCGATAACGAACGAGA  
CTCTAGCCTACTAAATAGTTTCGCAGATTTGTCTGCGCAACTTCTTAGAGGGACAAGTGGCGTTTAG  
CCACGCGAGATTGAGCAATAACAGGTCTGTGATGCCCTTAGATGTTCCGGGGCCGCACGCGCGCTAC  
ACTGAAGGAATCAGCGTGTGTTCTCCTGGCCAGAAATGGTTGGGTAACCCGTTGAACCTCCTTCGT  
GCTAGGGATTGGGGCTTGCAATTTCTCCCATGAACGAGGAATTTCCAGTAAGCGCGAGTCATCAG  
CTCGGTTGATTACGTCCCTGCCCTTTGTACACACCGCCCGTCGCTACTACCGATTGGATGGTTTA  
GTGAGACCTTCGGATTGGTCCCGACGGTGGGCAACCACCGTCGAGGTGCCGAGAAGATGTTCAAAC  
TTGACTATCTAGAGGAAGTAAAAGTTCACTAAGCGGAGGAAAAGAACTAACAAGGATTCCCCTAG  
TAACGGCGAGTGAAGCGGAAGAGCCCAGCACCGAATCCCCTGCGTTTG-CGTAGCGGGACCTGTG  
GTGTTTGGGAGAGCCTCTGAGGCGTCGACGGCGTCCGAGTCCTCCTGATCGGGGTCACCCAGAGCG  
GGTGTAAAGGCCATACGACTTCCGTCTTCGTCTCTCTGTGCCTCCCTGGAGTCGGGTTGTTTGTGA  
ATGCAGCCCAAAGTGGGTGGTAAACTCCATCTAAGGCTAAATACTGGCACGAGTCCGATAGCGGAC  
AAGTACCGTGAGGGAAAGTTGAAAAGAAGTTTGAAGAGAGAGTTCAAGAGTACGTGAAACCGCATA  
GAGGCAAACGGATGGGACCGCAGTCGACCTTCAGAATTCATCTGCCGAGGGGCTGGCGTCTACTCT  
TCATCGACAGTGCATTTCTGGAGGTGGAGCGCTACGACCGGTTTCTGGGCCGTCAAGCCCCGGGG  
AAAGGTAGCTCGAGTGTATAGTCCCCGGTG-TGTCGGCCGGGGAGACCGAGGAACACCCGCTGA  
GCCCTGCGCACCTGGAAGGACTGCTTGCAGTGCTTACTAACCAGGTTGTAGGGGCCAGCCAGGGTC  
TGTAGCGAAGTCGGT-TTCCATCCGACC



>Boccardiella\_hamata

CGCCTCTAGATTAGAGGTCCATTCTGCCCTATGTAAATGGCCGCGGTAGCCTGACCGTGCTAAGGT  
AGCATAATCATTGCCGTTTAATTGGTGGCTGGAATGAACGAATATACGAGAGTTTAGCTGTCTCC  
TTTTTAATAAAAAATTGACTTTCAGGTGAAGAGACCTGAATATTTAAAAAAGACGAAAAGACCCAT  
AGAGCTTCACCTTTACCACTTTACTAAATAAAGGTTTAGTTGGGGCAACTAGAGAGAACTAAAACC  
TCTCTTTAATAAAAATTGATCCGATGCGATAACAGAAAAAGCTACCTTAGGGATAACAGGCTAATC  
TTCTTTGAGAGACCATATTGACAAGAAGGATTGGCACCTCGATGTTGGCTCAAGGTTACAGTTTGA  
TGCAGCAGTAAGTAGGTTTGTTCACCCCTTTAAATCCTTATATGCTTGTCTCAAAGACTAAGCCATG  
CATGTCTAAGTATAAGCTCTATATGGTGAACCGCGAATGGCTCATTAAATCAGTTATGGTTCCTT  
AGATCTTAAAATCCTACTTGGATAACTGTAGTAATTCTAGAGCTAATACATGCACCTGAGCTCCAA  
CCCTCGGGGAAGAGCGCTTTTATTAGACCAAACCAATGGTCCGTGCCAACCTTTGGTGA CTCTGG  
ATAACTTC-AGCTGATCGCACGGCCGCGCCGGCGACGTATCTTTCAAGTGTCTGCCCTATCAAGTT  
TCGATGGTTGGTGA CTTGCCAACCATGCTCGTAACGGGTAGCGGGGAATCAGGGTTCGATTCCGGA  
GAGGGAGCATGAGAAACGGCTACCACATCCAAGGAAGGCAGCAGGCGCGCAAATTACCCACTCCTA  
GCTCGGGGAGGTAGTGACGAAAAATAACAATACGGGACTCTTACGAGGCCCGTAATTGGAATGAG  
TACACTTTAAATCCTTTAACGAGGATCTATTGGAGGGCAAGTCTGGTGCCAGCAGCCGCGGTAATT  
CCAGCTCCAATAGCGTATATTAAGTTGTTGCAGTTAAAAAGCTCGTAGTTGGATCTCGGGGGCGG  
TCCGGCGGTCTCCTCGCGGAGGTTCACTGCCTGCCGCCCTCCTCACCGGCTTCCCCGGGTGCTCT  
TCGCTGAGGCGGCCGGAATGTTTACTTTGAAAAATTAGAGTGTTCAAAGCAGGCCCTGAATATTG  
GCGCATGGAATAATGGAATAGGACCTCGGATTTTGTGGTTTTTCGGAAGTCGAGGTAATGATTAGT  
AGGGACGACGGGGCATTTCGTATTGCGCGGTTAGAGGTGAAATTCTTGGATCCGCGCAAGACGAAC  
TACAGCGAAGGCGTCTGCCAAGTGCCTTTCATTAATCAAGAGCGACAGTCAGAGGTTTCAAGACG  
ATCAGATAACCGTCGTAGTTCTGACCATAAACGATGCCAGCTAGGGATGGGCGGACGTTGCACGACT  
CCGCCCCGACCTTCCGGGAAACCAAAGCTTTTGGGTTCCGGGGGAAGTATGGTTGCAAAGCTGAAA  
CTTAAAGGAATTGACGGAAGGGCACCACCAGGAGTGGAGCCTGCGGCTTAATTTGACTCAACACGG  
GGAAACTCACCCGGCCCGGACACCGTAAGGATTGACAGATTGAAAGCTCTTTCTTGATTGCGGTGGG  
TGGTGGTGCATGGCCGTTCTTAGTTGGTGGAGCGATTTGTCTGGTTAATTCGATAACGAACGAGA  
CTCTAGCCTGCTAAATAGTTCCGCCGTAAGCCGGCGTAACCTTCTTAGAGGGACAAGTGGCGTTCAG  
CCACGCGAGATTGAGCAATAACAGGTCTGTGATGCCCTTAGATGTTCCGGGGCCGCACGCGCGCTAC  
ACTGAAGGACTCAGCTGGT--TCTCCTTGCTGAGAAGGCTGGGTAACCCGTTGAACCTCCTTCGT  
GCTAGGGATTGGGGTTTGCAATTATCCCCATGAACGAGGAATTCCCAGTAGGCGCGAGTCATCAG  
CTCGCGTCGATTACGTCCCTGCCCTTTGTACACACCGCCCGTCTACTACCGATCGGATGGTTTA  
GTGAGACCTCTGGACTGGTCCCGTCAGCGGGCAACCGCCGACGCGTTGCCGGGAAGAAGGTCGAAC  
TTGACTATCTAGAGGAAGTAAAAGTTCACTAAGCGGAGGAAAAGAACTAACAAGGATTCCTTAG  
TAACGGCGAGTGAACGGGATGAGCCCAGCACCGAATCCCCTGCCAC--GGCAGCGGGA ACTGTG  
GTGTTTAGGAGAGCCTGTGGGGCGGCGG-GGCGTCCGAGTCCTTATGAAAGGGGTTGCCAGAGCG

GGTGTCTAGGACGCCCCGTCCCGTCGCTCAGTACCTCCTCGGAGTCGGGTTGTTTGAGA  
TTGCAGCCCAAAGCGGGTGGTAACTCCATCTAAGGCTAAATACTGGCACGAGACCGATAGCAAAC  
AAGTACCGTGAGGGAAAGTTGAAAAGAACTTTGAAGAGAGAGTTCAAGAGTACGTGAAACCGTATA  
GAAGTAAACGGATGGGACCGCAGTGGACCGGCGGGATTTCAGTTCTCGC-GGGCGGATCGGAGACCT  
TCACCGGGAATGCACTTTCCGCCGGGACAGCGCCACGACCTGTTCCGGGGCCGCCAGGCCCGGAGG  
GAAGGTAGCTCGAGTGTATAGCCCTTCGGTGTTCGGCCGGGGGACATAGGAATACCCGCCGGA  
GACCGGTGGACTGTTCGAGGACTGCACGCAGTGTTCGGCGACCGCGCCTCTCGGGCCCCCAGGGTC  
AGTGGCGAAGTTGGCTCCCCATCCGACC

>Boccardia\_pseudonatrix

CGCCTCCAGATTGGAGGTCCA-TCTGCCCTATGTAAATGGCCGCGGTATCCTGACCGTGCTAAGGT  
AGCATAATCATTTGCCGTTAATTGGCGGCTAGTATGAAAGAATAGACGAGAGCAATGCTGTCTCT  
TTTTTACTAAAAATTGATCTTCAGGTACAGTCACCTGAATTCCAAACCGGAACGAAAAGACCCAT  
AGAGCTTTACCTAACTACTCTAAAGACGGAAGTTTTAGTTGGGGCAACTAGCGAGTACTAAAACC  
TCCCTACCCATTTCTCTGATCCCCACAGATTAAGAAATAGCTACCTTAGGGATAACAGGCTAATT  
CCCCTAAGAGACCATATTGACAGGGGAGTTTGGCACCTCGATGTTGGCTTAGGG-CGCAACTTGA  
TGCAGCAGTCCGCGGGTTTGTTCACCCCTTAATACCC-ATATGCTTGTCTCAAAGACTAAGCCATG  
CATGTCTAAGTATAAGCTCTACACGGTGAACCGCGAATGGCTCATTAAATCAGTTATGGTTCCCT  
AGATCGTAAAATCCTACTTGGATAACTGTAGTAATTCTAGAGCTAATACATGCACCTCAGCTCCGA  
CCCTCGGGAAAGAGCGCTTTTATTAGACCAAACCAATGGCTCGCGCCAACCTTTGGTGACTCTGG  
ATAACTTC-AGCCGACCGCACGGCCGAGCCGGCGGGCGTATCTTTCAAATGTCTGCCCTATCAAGTT  
TCGATGGTTGGTGACTTGCCAACCATGCTCATAACGGGTAGCGGGGAATCAGGGTTTCGATTCCGGA  
GAGGGAGCATGAGAAACGGCTACCACATCCAAGGAAGGCAGCAGGCGCGCAAATTACCCACTCCTA  
GCTCGGGGAGGTAGTGACGAAAATAACAATACGGGACTCTTACGAGGCCCCGTAATTGGAATGAG  
TACACTTTAAATCCTTTAACGAGGATCTATTGGAGGGCAAGTCTGGTGCCAGCAGCCGCGGTAATT  
CCAGCTCCAATAGCGTATATTAAGTTGTTGCAGTTAAAAAGCTCGTAGTTGGATCTCGGGGGCGG  
TCCGGCGGTCTCCTCGCGGAGGTTCACTGCCTGCCGCCCTCCTCACCGGCTTCCCCGGGTGCTCT  
TCGCTGAGGCGGCCGGAATGTTTACTTTGAAAAAATTAGAGTGTTCGAAGGCAGGCCCTGAATATTG  
GCGCATGGAATAATGGAATAGGACCTCGGATTTTGTGGTTTTTCGGAAGTCGAGGTAATGATTAGT  
AGGGACGACGGGGCATTTCGTATTGCGCGGTTAGAGGTGAAATTCCTGGATCCGCGCAAGACGAAC  
TACAGCGAAGGCGTCTGCCAAGTGCGTCTTCATTAATCAAGAGCGACAGTCAGAGGTTCGAAGACG  
ATCAGATACCGTTCGTAGTTCTGACCATAAACGATGCCAGCTAGGGATGGGCGGACGTTGCACGACT  
CCGCCCCGACCTTTCCGGAAACCAAAGCTTTTGGGTTCCGGGGGAAGTATGGTTGCAAAGCTGAAA  
CTTAAAGGAATTGACGGAAGGGCACCACCAGGAGTGGAGCCTGCGGCTTAATTTGACTCAACACGG  
GGAAACTCACCCGGCCCGGACACCGTAAGGATTGACAGATTGAAAGCTCTTTCTTGATTTCGGTGGG  
TGGTGGTGCATGGCCGTTCTTAGTTGGTGGAGCGATTTGTCTGGTTAATTCCGATAACGAACGAGA

CTCTAGCCTGCTAAATAGTTCGCCGGTAAGCCGGCGCAACTTCTTAGAGGGACAAGTGGCTTTCAG  
CCACGCGAGATTGAGCAATAACAGGTCTGTGATGCCCTTAGATGTTTCGGGGCCGCACGCGCGCTAC  
ACTGAAGGACTCAGCTGGT--TCTCCTGGCCTGAAAAGGTCTGGGCAACCCGTTGAACCTCCTTCGT  
GCTAGGGATTGGGGTTGCAATTTTTCCCCATGAACGAGGAATCCCAGTAGGCGCGAGTCATCAG  
CTCGCGTCGATTACGTCCCTGCCCTTGTACACACCGCCCGTCGCTACTACCGATCGGATGGTTTA  
GTGAGACCCTCGGACTGGTCCCGTCAGTGGGCAACTGCTGACGCGTTGCCGGGAAGAAGGTGCAAC  
TTGACTATCTAGAGGAAGTAAAAGT-CACTAAGCGGAGGAAAAGAACTAACCAGGATTCCTGAG  
TAACGGCGAGTGAACGGGAAGAGCCCAGCACCGAATCCCCTGGCTTTTAGCTAGCGGGAAGTGTG  
GTGTTTAGGAGAGCCTGTGGAGCGGCGG-AGCGTCCGAGTCCCTATGAACGGGGGCAGCCAGAGCG  
GGTGTCTAGTCCCTTAGGACGCCCCGTCCCCTGCTCAGTACCTCCTCGGAGTCGGGTTGTTTGA  
TTGCAGCCCAAAGTGGGTGGTAAACTCCATYTAAGGCTAAATACTGGCACGAGACCGATAGCAAAC  
AAGTACCGTGAGGGAAAGTTGAAAAGAAGTTTGAAGAGAGAGTTCAAGAGTACGTGAAACCGTATA  
GAAGTAAACGGATGGGACCGCAGTGTACCGGCGGGATTAGTTCGCTC-GGGCGGCTCGGAGACCT  
TTACCGGGAATGCACTTTCGTCGGGACAGCGCCACGACCGGTTCTCGAGCCGCCAGGCCCGGAGG  
TAAGGTAGCTCGAGTATTATAGACCTCCGGTGTTCGGGCCGGGGGACCGAGGAATACCCGCCGGA  
GACCGGTGGACTGGTGGAGACTGCTCGCAGTGTCTCGCCGACCGCGCCGTTTCGGGCCCCCCAGGGTC  
TGTGGCGAAGTTGGC-CCCCATCCAACC

>Dipolydora\_giardi

-----TTAAGAGGTCATTCTGCCCTATGTAAATGGCCGCGGTAGCCTGACCGTGCTAAGGT  
AGCATAATCATTGCCGTTTAATTGGTGGCTGGAATGAATGAATATAACGAGAGCTCTACTGTCTCA  
CCTTTAATAAAAAATTGACCCTCAAGTGAAGAGACTTGAATTTCCCAAAAAGACGAAAAGACCCAT  
AGAGCTTTACCTAAAACATTCTACAAGTCTAAGGTTTAGTTGGGGCAACTAGAGAGAACTAAAACC  
TCTCTTCTAAAAAATTGATCCGTTACGACATCAGAAAAAGCTACCTTAGGGATAACAGGCTAATC  
CTCTTTAAGAGACCATATTGACAAGAGGGTTTGGCACCTCGATGTTGGCTCAAGGTTACAGTCTGA  
TGCAGCAGTAAGTAGGTTTGTTCACCCTTTAAATCCTTATATGCTTGTCTCAAAGACTAAGCCATG  
CATGTCTAAGTATAAGCTCTACATGGTGAACCGCGAATGGCTCATTAAATCAGTTATGGTTCCTT  
AGATCTTAAAAATCCTACTTGGATAACTGTAGTAATTCTAGAGCTAATACATGCAATCAAGCTCCGA  
CCCAGGGAAAGAGCGCTTTTATTAGACCAAACCAATGGTTCGCGCCAACCTTTGGTACTCTGG  
ATAACTTC-AGCTGATCGCAAGGCCGAGCCGGCGACGTATCTTTCAAATGTCTGCCCTATCAAGTT  
TCGATGGTTGGTACTTGCCAACCATGCTCGTAACGGGTAGCGGGGAATCAGGGTTCGATTCCGGA  
GAGGGAGCATGAGAAACGGCTACCACATCCAAGGAAGGCAGCAGGCGCGCAAATTACCCACTCCTG  
GATCGGGGAGGTAGTGACGAAAATAACAATACGGGACTCTTACGAGGCCCCGTAATTGGAATGAG  
TACACTTTAAATCCTTTAACGAGGATCTATTGGAGGGCAAGTCTGGTGCCAGCAGCCGCGGTAATT  
CCAGCTCCAATAGCGTATATTAAAGTTGTTGCAGTTAAAAAGCTCGTAGTTGGATCTCGGGAGCGG  
TCCGGCGGTCCTCCGCAAGGAGGTTCACTGCCCGCCGCTCTCCTCACCGGCTTGCCCGGGTGTCTCT

TCGTTGGGTTGGCCGGAATGTTTACTTTGAAAAAATTAGAGTGTTCAAAGCAGGCCCTGAATATTG  
GCGCATGGAATAATGGAATAGGACCTCGGATTTTGTTGGTTTTTCGGAAGTCGAGGTAATGATTAGT  
AGGGACGACGGGGCATTTCGTATTGCACGGTTAGAGGTGAAATTCTTGGATCCGTGCAAGACGAAC  
TACAGCGAAGGCGTCTGCCAAGTGCCTTTCATTAATCAAGAGCGACAGTCAGAGGTTTGAAGACG  
ATCAGATAACCGTCGTAGTTCTGACCATAAACGATGCCAGCTAGGGATGGGCGGACGTTGTTGACT  
CCGCCCCGACCTTCCGGGAAACCAAAGCTTTTGGGTTCCGGGGGAAGTATGGTTGCAAAGCTGAAA  
CTTAAAGGAATTGACGGAAGGGCACCACCAGGAGTGGAGCCTGCGGCTTAATTTGACTCAACACGG  
GGAAACTCACCCGGCCCGGACACCGTAAGGATTGACAGATTGAGAGCTCTTTCTTGATTGCGGTGGG  
TGGTGGTGCATGGCCGTTCTTAGTTGGTGGAGCGATTTGTCTGGTTAATTCGATAACGAACGAGA  
CTCTAGCCTGCTAAATAGTTTCGTTCGTAAGCCGGCGCAACTTCTTAGAGGGACAAGTGGCGTTTAG  
CCACGCGAGATTGAGCAATAACAGGTCTGTGATGCCCTTAGATGTTCCGGGCGCACGCGCGCTAC  
ACTGAAGGAATCAGCTGGT--TCTCCTGGCCTGAAAAGGTCCGGCAACCCGTTGAACCTCCTTCGT  
GCTAGGGATTGGGGTTGCAATTCCTCCCATGAACGAGGAATTCAGTAGGCGCGAGTCATCAG  
CTCGCGTCGATTACGTCCCTGCCCTTTGTACACACCGCCCGTCGCTACTACCGATCGGATGGTTTA  
GTGAGACCCTCGGACTGGTCCCGTCAGCGGGCAACCGCCGACGCGTTGCCGGGAAGAAGGTGCAAC  
TTGACTATCTAGAGGAAGTAAAAGT-CACTAAGCGGAGGAAAAGAACTAACAGGATTCCTTAG  
TAACGGCGAGTGAAACGGGAAGTGCCAGCACC GAATCCCCTGCCGTTT-GGCAGCGGGAAATGTG  
GTGTTTAGGAGAGCCTGTGGAGCGGCGG-AGCGTCCGAGTCCTTATGAAAGGGGGCAGCCAGAGCG  
GGTGTTAGTCTCTAGGACGTCCCGTCCCGTTGCTCAGTACCTCCTCGGAGTCGGGTTGTTTGTGA  
ATGCAGCCCTAAGTGGGTGGTAAACTCCATCTAAGGCTAAATACTGGCACGAGACCGATAGCAAAC  
AAGTACCGTGAGGGAAAGTTGAAAAGAACTTTGAAGAGAGAGTTCAAGAGTACGTGAAACCGTATA  
GAAGTAAACGGATGGGACCGCAGTGGACCGACGGGATTCAATTCCTTTCCGGGGCGGATCAGAGACCT  
TAACCGGGAATGCACTTTCCGTCCGGACAGCGCCAGGACCGGTTCTCCGGCCGCCAGGCCCGTTGG  
GAAGGTAGCTCGAGTGTTATAGCCCTACGGTGTTCCGGCCGGGAGGACCGAGGAATACCCGCCGGA  
GACCGTTGGACTGGCGAGGACTGCTCGCAGTGCTCGTCGACCGCGGCGTTTCAGGCCCCCAGGGTC  
GCTGGCGAAGTTGGCTCCCCATCCGAC-
